# Supplementary material for: Dynamic Transcriptome Analysis Reveals Potential Long Non-coding RNAs Governing Postnatal Pineal Development in Pig
Source: Front Genet. 2019 May 3;10:409. doi: 10.3389/fgene.2019.00409 (PMC6510172; doi:10.3389/fgene.2019.00409)
Supplement: Table S3 — GO biological process enrichment analysis of the differentially expressed genes between different developmental stages. [file Table_3.XLSX]

## Sheet: Y180-Y30_up
Category	Term	Count	%	PValue	Genes	List Total	Pop Hits	Pop Total	Fold Enrichment	Bonferroni	Benjamini	FDR
GOTERM_BP_FAT	GO:0006811~ion transport	68	10.9149	2.36523e-11	STEAP3, KCNJ16, SLC8A3, SLC22A13, GABRB3, KCNAB1, ATP1B2, TRPV2, GLRA3, GRIK3, GABRB1, KCNJ10, KCNK13, KCNIP1, KCNIP3, KCNQ5, SLC1A6, SLC22A4, MCOLN2, NSF, ATP6, GRID1, TRPM6, TRPM8, CACNG7, TRPA1, CNGA1, PRKCB, GABRR2, CLIC4, RYR3, KCNH6, KCNH7, PLLP, KCNH5, SCN1B, CACNB2, ATP6V1B2, P2RY6, SCNN1B, HCN4, GABRA2, MLC1, TRPC5, KCNB1, SLC12A5, ATP1A3, CACNA2D3, CACNA2D4, CNNM1, SLC17A7, KCNJ5, SLC4A…	497	768	13528	2.41004	6.00059e-08	6.00059e-08	4.17948e-08
GOTERM_BP_FAT	GO:0019226~transmission of nerve impulse	41	6.58106	1.54738e-10	SCN1B, GABRB3, GLRA3, DRD4, CACNB2, ADORA1, KCNIP1, TGFB1, ACSBG1, KCNQ5, SYN1, SLC1A6, SYN2, SNPH, CNTNAP2, LGI4, GABRA2, DLGAP1, GPR176, EGR2, PCDHB5, SLC12A5, BSN, PDYN, STX1B, GABRR2, GRM5, SLC17A7, CBLN1, CAMK4, GRIA1, GRM7, KCNN3, GRM6, TMOD2, PLLP, CACNA1E, SCN8A, CACNA1A, HTR2A, CACNA1B	497	350	13528	3.18855	3.92569e-07	1.96285e-07	2.73429e-07
GOTERM_BP_FAT	GO:0030001~metal ion transport	48	7.70465	2.51279e-10	STEAP3, SLC8A3, KCNJ16, SCN1B, KCNAB1, ATP1B2, TRPV2, CACNB2, KCNJ10, KCNK13, KCNIP1, KCNIP3, KCNQ5, SLC22A4, HCN4, SCNN1B, NSF, TRPM6, TRPM8, TRPC5, CACNG7, KCNB1, SLC12A5, TRPA1, ATP1A3, CACNA2D3, CNGA1, PRKCB, CACNA2D4, KCNJ5, SLC17A7, SLC4A11, SLC6A8, SLC17A1, RYR3, KCNN3, SLC17A2, KCNH6, CACNA1G, KCNH7, CACNA1E, CP, SCN8A, CACNA1D, CACNA1A, KCNH5, CACNA1B, SLC9A1	497	465	13528	2.80974	6.37494e-07	2.12498e-07	4.44022e-07
GOTERM_BP_FAT	GO:0006812~cation transport	53	8.50722	3.64783e-10	STEAP3, KCNJ16, SLC8A3, SLC22A13, KCNAB1, ATP1B2, TRPV2, KCNJ10, KCNK13, KCNIP1, KCNIP3, KCNQ5, SLC22A4, NSF, ATP6, TRPM6, TRPM8, CACNG7, TRPA1, CNGA1, PRKCB, RYR3, KCNH6, KCNH7, KCNH5, SCN1B, CACNB2, ATP6V1B2, HCN4, SCNN1B, TRPC5, KCNB1, SLC12A5, ATP1A3, CACNA2D3, CACNA2D4, KCNJ5, SLC17A7, SLC4A11, UCP2, SLC6A8, KCNN3, SLC17A1, SLC17A2, CACNA1G, CACNA1E, CP, SCN8A, PDZK1, CACNA1D, CACNA1A, CACNA…	497	553	13528	2.60872	9.25453e-07	2.31363e-07	6.4459e-07
GOTERM_BP_FAT	GO:0007267~cell-cell signaling	55	8.82825	8.21219e-10	GABRB3, GLRA3, FGF12, VGF, KCNIP1, ADORA1, LNPEP, PGR, KCNQ5, PCDH1, TNFRSF11A, SLC1A6, SNPH, RAPGEF4, FGF1, GPR176, PCDHB5, BSN, PDYN, STX1B, GABRR2, GRM5, INHBA, CBLN1, CAMK4, GRM7, GRM6, STC1, GAL3ST4, SCN1B, NDP, DRD4, CACNB2, NMB, PCSK1, SYN1, AGT, SYN2, DLGAP1, GABRA2, SLC12A5, SLC17A7, CXCL14, GRIA1, SALL1, KCNN3, NTRK2, TMOD2, ADRA1A, CACNA1E, AREG, PHEX, CACNA1A, CACNA1B, HTR2A	497	600	13528	2.4951	2.08343e-06	4.16687e-07	1.45114e-06
GOTERM_BP_FAT	GO:0007268~synaptic transmission	34	5.45746	1.44356e-08	SCN1B, GABRB3, GLRA3, DRD4, CACNB2, ADORA1, KCNIP1, KCNQ5, SYN1, SLC1A6, SYN2, SNPH, GABRA2, DLGAP1, GPR176, PCDHB5, SLC12A5, BSN, PDYN, STX1B, GABRR2, SLC17A7, GRM5, CBLN1, CAMK4, GRIA1, GRM7, KCNN3, GRM6, TMOD2, CACNA1E, CACNA1A, HTR2A, CACNA1B	497	298	13528	3.10556	3.66225e-05	6.10384e-06	2.55085e-05
GOTERM_BP_FAT	GO:0007155~cell adhesion	56	8.98876	6.86896e-08	AEBP1, MYBPC1, LMO7, SDC3, NRCAM, CD96, PCDH1, GP5, CD44, CNTNAP2, CNTNAP1, KIRREL2, RET, PCDHB5, ICAM5, CNTNAP5, STXBP1, PTPRT, CTNNA3, CD84, AMIGO2, AMBN, F5, HEPACAM, CX3CR1, CNTN2, CNTN1, CNTN3, CD226, CLDN18, ITGB4, ASTN1, CTNND2, PCDHGC5, CX3CL1, LAMB3, PTK2B, COMP, AGT, TNN, GPNMB, FLRT2, OLR1, ADAM23, NFASC, CCL11, CASS4, CDH18, CDH19, NPHS1, CYFIP2, FBLN7, BMPR1B, COL20A1, CDH10, NTM	497	700	13528	2.17755	0.00017425	2.48947e-05	0.000121378
GOTERM_BP_FAT	GO:0022610~biological adhesion	56	8.98876	7.0142e-08	AEBP1, MYBPC1, LMO7, SDC3, NRCAM, CD96, PCDH1, GP5, CD44, CNTNAP2, CNTNAP1, KIRREL2, RET, PCDHB5, ICAM5, CNTNAP5, STXBP1, PTPRT, CTNNA3, CD84, AMIGO2, AMBN, F5, HEPACAM, CX3CR1, CNTN2, CNTN1, CNTN3, CD226, CLDN18, ITGB4, ASTN1, CTNND2, PCDHGC5, CX3CL1, LAMB3, PTK2B, COMP, AGT, TNN, GPNMB, FLRT2, OLR1, ADAM23, NFASC, CCL11, CASS4, CDH18, CDH19, NPHS1, CYFIP2, FBLN7, BMPR1B, COL20A1, CDH10, NTM	497	701	13528	2.17444	0.000177934	2.22435e-05	0.000123944
GOTERM_BP_FAT	GO:0015672~monovalent inorganic cation transport	33	5.29695	2.26083e-07	SLC8A3, KCNJ16, SCN1B, KCNAB1, ATP1B2, KCNJ10, ATP6V1B2, KCNK13, KCNIP1, KCNIP3, KCNQ5, SLC22A4, HCN4, SCNN1B, NSF, ATP6, KCNB1, SLC12A5, ATP1A3, CNGA1, KCNJ5, SLC17A7, SLC4A11, SLC6A8, UCP2, KCNN3, SLC17A1, SLC17A2, KCNH6, KCNH7, SCN8A, KCNH5, SLC9A1	497	318	13528	2.82465	0.000573409	6.37284e-05	0.0003995
GOTERM_BP_FAT	GO:0050877~neurological system process	77	12.3596	1.96657e-06	GABRB3, PTGS2, WFS1, TRPV2, RRH, GLRA3, CRHBP, RCVRN, NR2E3, KCNIP1, CALB1, ADORA1, TGFB1, KCNIP3, FOS, KCNQ5, SLC1A6, SNPH, LGI4, CNTNAP2, PLCB2, IMPDH1, EGR2, C5AR1, GPR176, TRPM8, PCDHB5, TMIE, TRPA1, BSN, PDYN, STX1B, NTSR2, CNGA1, GABRR2, GRM5, CBLN1, PPEF2, CAMK4, RASGRF1, GRM7, GRM6, PLLP, IL12B, RBP4, SCN1B, RBP3, NDP, DRD4, CTNND2, CACNB2, CABP4, ACSBG1, ESPN, SYN1, AGT, SYN2, SCNN1B, GU…	497	1210	13528	1.73214	0.00497676	0.000498794	0.00347497
GOTERM_BP_FAT	GO:0007610~behavior	37	5.939	2.305e-05	CCK, PTGS2, WFS1, CRHBP, DRD4, ASTN1, CTNND2, CX3CL1, CALB1, KCNIP3, ESPN, TAL2, FOS, NPAS2, AGT, C5AR1, EGR2, MET, NR4A2, ATP1A3, BRS3, FOSB, CCL11, CCR9, CXCL14, PTGDS, RASGRF1, GRIA1, GRM7, NTRK2, CX3CR1, GRM6, TMOD2, RASD2, PTAFR, CACNA1A, HTR2A	497	469	13528	2.14737	0.0568015	0.00530212	0.0407227
GOTERM_BP_FAT	GO:0006813~potassium ion transport	19	3.04976	2.32511e-05	KCNJ16, KCNAB1, ATP1B2, KCNB1, SLC12A5, ATP1A3, KCNJ10, KCNK13, KCNIP1, CNGA1, KCNIP3, KCNJ5, KCNQ5, KCNN3, KCNH6, KCNH7, HCN4, NSF, KCNH5	497	160	13528	3.23229	0.0572825	0.00490366	0.0410779
GOTERM_BP_FAT	GO:0006873~cellular ion homeostasis	31	4.97592	4.972e-05	CCK, WFS1, GRIK3, DRD4, ADORA1, TGFB1, ACSBG1, S1PR3, ALAS2, PTK2B, AGT, SLC1A6, LGI4, EGR2, C5AR1, TRPM8, ACO1, RXFP3, SLC12A5, NTSR2, PRKCB, CCL11, CCR9, SLC4A11, RYR3, CACNA1G, PLLP, STC1, SCN8A, CP, CACNA1A	497	374	13528	2.25615	0.118511	0.00965637	0.0878214
GOTERM_BP_FAT	GO:0048666~neuron development	29	4.6549	5.30119e-05	S100A6, CCK, ONECUT2, CABP4, NR2E3, NRCAM, EFHD1, CD44, PTK2B, CNTNAP2, LGI4, TNN, LHX6, RET, EGR2, KIF5C, MAP1B, STXBP1, NR4A2, NFASC, NTN1, RASGRF1, NTRK2, CNTN2, BMPR1B, SLITRK5, NTM, CACNA1A, GFRA3	497	339	13528	2.3285	0.125843	0.00956077	0.0936333
GOTERM_BP_FAT	GO:0055085~transmembrane transport	41	6.58106	6.09483e-05	SLC8A3, RBP4, SLC22A13, KCNAB1, TRPV2, AQP4, ATP6V1B2, KCNQ5, SLC2A5, SLC22A4, SV2B, MCOLN2, HCN4, SV2C, ATP6, TRPM6, TRPM8, TRPC5, KCNB1, SLC12A5, TRPA1, CNGA1, SLC17A7, SLC16A4, UCP2, SLC17A1, RYR3, SLC25A35, SLC17A2, KCNH6, CACNA1G, KCNH7, CACNA1E, SCN8A, SLC46A3, PDZK1, CACNA1D, CACNA1A, KCNH5, CACNA1B, SLC9A1	497	569	13528	1.96132	0.143268	0.0102558	0.107644
GOTERM_BP_FAT	GO:0006816~calcium ion transport	17	2.72873	6.4293e-05	SLC8A3, TRPM6, TRPM8, TRPC5, TRPV2, CACNG7, TRPA1, CACNB2, CACNA2D3, CACNA2D4, PRKCB, RYR3, CACNA1G, CACNA1E, CACNA1D, CACNA1A, CACNA1B	497	142	13528	3.25865	0.150508	0.010143	0.113548
GOTERM_BP_FAT	GO:0055082~cellular chemical homeostasis	31	4.97592	6.69154e-05	CCK, WFS1, GRIK3, DRD4, ADORA1, TGFB1, ACSBG1, S1PR3, ALAS2, PTK2B, AGT, SLC1A6, LGI4, EGR2, C5AR1, TRPM8, ACO1, RXFP3, SLC12A5, NTSR2, PRKCB, CCL11, CCR9, SLC4A11, RYR3, CACNA1G, PLLP, STC1, SCN8A, CP, CACNA1A	497	380	13528	2.22052	0.156141	0.00993677	0.118177
GOTERM_BP_FAT	GO:0009409~response to cold	7	1.1236	7.99205e-05	FOS, ADRB2, TRPM8, DIO2, AGT, TRPA1, VGF	497	21	13528	9.07311	0.183531	0.0112016	0.14113
GOTERM_BP_FAT	GO:0050801~ion homeostasis	32	5.13644	0.000107557	CCK, WFS1, GRIK3, DRD4, ADORA1, TGFB1, ACSBG1, S1PR3, ALAS2, PTK2B, AGT, SLC1A6, LGI4, EGR2, C5AR1, TRPM8, ACO1, RXFP3, SLC12A5, NTSR2, PRKCB, CCL11, CCR9, SLC4A11, RYR3, CACNA1G, PLLP, STC1, SCN8A, CP, CACNA1A, SLC9A1	497	409	13528	2.12963	0.238822	0.0142599	0.189889
GOTERM_BP_FAT	GO:0048878~chemical homeostasis	37	5.939	0.000141171	RBP4, CCK, WFS1, GRIK3, DRD4, PDE3B, VGF, ADORA1, TGFB1, ACSBG1, S1PR3, ALAS2, PTK2B, SLC1A6, AGT, LGI4, EGR2, C5AR1, TRPM8, ACO1, RXFP3, SLC12A5, MLXIPL, NTSR2, PRKCB, CCL11, CCR9, SLC4A11, RYR3, CACNA1G, PLLP, STC1, CACNA1E, CP, SCN8A, CACNA1A, SLC9A1	497	512	13528	1.96702	0.30105	0.0177494	0.249163
GOTERM_BP_FAT	GO:0031644~regulation of neurological system process	17	2.72873	0.00015647	CCK, EGR2, PTGS2, GRIK3, DRD4, MAP1B, CTNND2, STXBP1, VGF, ADORA1, CALB1, ADRB2, RASGRF1, AGT, NTRK2, CACNA1A, HTR2A	497	153	13528	3.02437	0.327664	0.018727	0.276131
GOTERM_BP_FAT	GO:0051046~regulation of secretion	20	3.21027	0.000162024	RBP4, RAB3C, DRD4, TNFSF15, STXBP1, PDE3B, ADORA1, STX1B, NKX6-1, TGFB1, INHBA, PCSK1, AGT, GRM7, NTRK2, RAPGEF4, PDE8B, NSF, CACNA1A, HTR2A	497	202	13528	2.69498	0.337072	0.0185123	0.285919
GOTERM_BP_FAT	GO:0009628~response to abiotic stimulus	29	4.6549	0.000216525	RBP4, TRPV2, RRH, CABP4, KMO, RCVRN, NR2E3, VGF, TGFB1, FOS, PTK2B, AGT, GUCA1A, TRPM8, ACTA1, CRYAB, TRPA1, MAP1B, ATP1A3, XRRA1, CCL11, ADRB2, HSPB6, DIO2, HSPB8, GRM6, PDC, IL12B, SLC9A1	497	368	13528	2.145	0.422694	0.0236032	0.381921
GOTERM_BP_FAT	GO:0015674~di-, tri-valent inorganic cation transport	18	2.88925	0.000258327	STEAP3, SLC8A3, TRPM6, TRPM8, TRPC5, TRPV2, CACNG7, TRPA1, CACNB2, CACNA2D3, CACNA2D4, PRKCB, RYR3, CACNA1G, CACNA1E, CACNA1D, CACNA1A, CACNA1B	497	176	13528	2.78379	0.480797	0.0269412	0.455495
GOTERM_BP_FAT	GO:0006814~sodium ion transport	15	2.4077	0.000293288	SLC8A3, SCN1B, ATP1B2, SLC12A5, ATP1A3, SLC17A7, SLC4A11, SLC6A8, SLC17A1, SLC17A2, SLC22A4, SCN8A, HCN4, SCNN1B, SLC9A1	497	130	13528	3.14069	0.524876	0.0293285	0.516989
GOTERM_BP_FAT	GO:0050804~regulation of synaptic transmission	15	2.4077	0.000466865	EGR2, PTGS2, GRIK3, DRD4, MAP1B, CTNND2, STXBP1, VGF, ADORA1, CALB1, RASGRF1, AGT, NTRK2, CACNA1A, HTR2A	497	136	13528	3.00213	0.694166	0.0445433	0.821771
GOTERM_BP_FAT	GO:0009583~detection of light stimulus	8	1.28411	0.000473637	GUCA1A, RBP4, RRH, GRM6, PDC, CABP4, RCVRN, NR2E3	497	39	13528	5.58345	0.699378	0.0435386	0.833644
GOTERM_BP_FAT	GO:0009991~response to extracellular stimulus	20	3.21027	0.0004885	RBP4, A2M, LDHA, CCK, ACTA1, PTGS2, GDAP1, MAP1B, NR4A2, HRK, TGFB1, PCSK1, ALDH1A2, FOS, CD44, ALB, SFRP2, ANGPT1, STC1, CP	497	220	13528	2.47448	0.710508	0.0433067	0.859698
GOTERM_BP_FAT	GO:0019725~cellular homeostasis	33	5.29695	0.000497137	CCK, WFS1, GRIK3, DRD4, ADORA1, TGFB1, ACSBG1, S1PR3, ALAS2, PTK2B, SLC1A6, AGT, HAAO, LGI4, EGR2, C5AR1, TRPM8, ACO1, RXFP3, SLC12A5, NTSR2, PRKCB, CCL11, CCR9, SLC4A11, RYR3, CACNA1G, PLLP, STC1, SCN8A, SH3BGRL3, CP, CACNA1A	497	466	13528	1.92755	0.716785	0.0425691	0.874835
GOTERM_BP_FAT	GO:0007202~activation of phospholipase C activity	10	1.60514	0.000572386	GRM5, P2RY6, C5AR1, AGT, RXFP3, P2RY1, HTR2B, PLCB2, NTSR2, HTR2A	497	65	13528	4.18759	0.766029	0.0472652	1.00662
GOTERM_BP_FAT	GO:0010863~positive regulation of phospholipase C activity	10	1.60514	0.000572386	GRM5, P2RY6, C5AR1, AGT, RXFP3, P2RY1, HTR2B, PLCB2, NTSR2, HTR2A	497	65	13528	4.18759	0.766029	0.0472652	1.00662
GOTERM_BP_FAT	GO:0030182~neuron differentiation	31	4.97592	0.000766967	S100A6, CCK, ONECUT2, CABP4, NR2E3, NRCAM, EFHD1, ALDH1A2, CD44, PTK2B, CNTNAP2, LGI4, TNN, LHX6, RET, EGR2, MAP1B, KIF5C, STXBP1, NR4A2, NFASC, NTN1, NKX6-1, RASGRF1, NTRK2, CNTN2, BMPR1B, SLITRK5, NTM, CACNA1A, GFRA3	497	438	13528	1.92648	0.857233	0.0608609	1.34664
GOTERM_BP_FAT	GO:0042592~homeostatic process	46	7.38363	0.000786758	RBP4, CCK, WFS1, GRIK3, DRD4, PDE3B, VGF, IL7R, ADORA1, TGFB1, ACSBG1, S1PR3, ALAS2, PTK2B, SLC1A6, AGT, HAAO, LGI4, FAS, C5AR1, EGR2, TRPM8, ACO1, RXFP3, SLC12A5, MLXIPL, NTSR2, PRKCB, EPHA3, CCR9, CCL11, INHBA, ADRB2, SLC4A11, RYR3, CACNA1G, TGFBR3, PLLP, STC1, CACNA1E, CP, SH3BGRL3, SCN8A, CACNA1A, HTR2A, SLC9A1	497	751	13528	1.66723	0.86423	0.0604927	1.38116
GOTERM_BP_FAT	GO:0060341~regulation of cellular localization	21	3.37079	0.000822454	RBP4, RAB3C, CRYAB, DRD4, TNFSF15, STXBP1, PDE3B, ADORA1, STX1B, NKX6-1, TGFB1, INHBA, PCSK1, AGT, GRM7, NTRK2, RAPGEF4, PDE8B, NSF, CACNA1A, HTR2A	497	248	13528	2.30486	0.875994	0.0612962	1.4434
GOTERM_BP_FAT	GO:0009266~response to temperature stimulus	11	1.76565	0.000884045	FOS, ADRB2, TRPM8, HSPB6, DIO2, CRYAB, TRPV2, HSPB8, AGT, TRPA1, VGF	497	83	13528	3.60738	0.893947	0.063864	1.55069
GOTERM_BP_FAT	GO:0010518~positive regulation of phospholipase activity	10	1.60514	0.000891668	GRM5, P2RY6, C5AR1, AGT, RXFP3, P2RY1, HTR2B, PLCB2, NTSR2, HTR2A	497	69	13528	3.94483	0.89598	0.0626158	1.56397
GOTERM_BP_FAT	GO:0043269~regulation of ion transport	12	1.92616	0.000986412	P2RY12, ADRB2, PTGS2, WFS1, P2RY1, DRD4, RCVRN, SCNN1B, ADORA1, PDZK1, TGFB1, HTR2A	497	99	13528	3.29931	0.918223	0.0671855	1.72878
GOTERM_BP_FAT	GO:0051969~regulation of transmission of nerve impulse	15	2.4077	0.00101484	EGR2, PTGS2, GRIK3, DRD4, MAP1B, CTNND2, STXBP1, VGF, ADORA1, CALB1, RASGRF1, AGT, NTRK2, CACNA1A, HTR2A	497	147	13528	2.77748	0.923918	0.067252	1.77818
GOTERM_BP_FAT	GO:0010517~regulation of phospholipase activity	10	1.60514	0.00109849	GRM5, P2RY6, C5AR1, AGT, RXFP3, P2RY1, HTR2B, PLCB2, NTSR2, HTR2A	497	71	13528	3.83371	0.93848	0.0707512	1.92341
GOTERM_BP_FAT	GO:0030003~cellular cation homeostasis	21	3.37079	0.00110721	C5AR1, TRPM8, WFS1, ACO1, RXFP3, SLC12A5, DRD4, TGFB1, PRKCB, CCL11, CCR9, S1PR3, SLC4A11, ALAS2, PTK2B, AGT, RYR3, CACNA1G, STC1, CP, CACNA1A	497	254	13528	2.25042	0.939828	0.0695298	1.93854
GOTERM_BP_FAT	GO:0021700~developmental maturation	12	1.92616	0.00116492	NRCAM, PGR, RET, PTGS2, CD44, PTK2B, MAP1B, STXBP1, NR4A2, LGI4, LHX6, CACNA1A	497	101	13528	3.23398	0.948032	0.0712614	2.0386
GOTERM_BP_FAT	GO:0042391~regulation of membrane potential	14	2.24719	0.00128185	EGR2, CCK, GRIK3, DRD4, ADORA1, NTSR2, TGFB1, ACSBG1, SLC1A6, CACNA1G, LGI4, PLLP, SCN8A, CACNA1A	497	134	13528	2.84381	0.961386	0.0763012	2.24105
GOTERM_BP_FAT	GO:0016337~cell-cell adhesion	22	3.5313	0.00128859	RET, CLDN18, PCDHB5, OLR1, ICAM5, ASTN1, CTNND2, STXBP1, LMO7, PCDHGC5, PTPRT, CTNNA3, NRCAM, CD84, AMIGO2, PCDH1, CD44, CDH18, CDH19, CYFIP2, BMPR1B, CDH10	497	276	13528	2.16966	0.962042	0.0749313	2.25271
GOTERM_BP_FAT	GO:0007166~cell surface receptor linked signal transduction	93	14.9278	0.00133178	GNA14, GPR160, CD8A, ADCY7, CD8B, RRH, GRIK3, SKAP1, ADORA1, TGFB1, FOS, S1PR3, CXCR6, RAPGEF4, ANGPT1, NPSR1, FGF1, RAMP3, RET, PTGER2, C5AR1, GPR176, CD3E, RXFP3, SLA2, PROKR1, PTPRT, TLE2, PDYN, NTSR2, GABRR2, GRM5, CCR9, INHBA, ADRB2, LPAR5, GRM7, GRM6, CX3CR1, CNTN1, STC1, MST1R, IL12B, PTAFR, LCP2, NKD1, CCK, APC2, C3, NDP, DRD4, ITGB4, NMB, IL7R, ADAP1, CPZ, APLNR, EPHB6, TNFRSF1B, P2RY6, …	497	1856	13528	1.3639	0.965986	0.0756158	2.32738
GOTERM_BP_FAT	GO:0007169~transmembrane receptor protein tyrosine kinase signaling pathway	19	3.04976	0.00153564	RET, CD8A, CD8B, CD3E, MET, PTPRT, TGFB1, EPHA3, EPHB6, ADRB2, EPHA8, PTK2B, NTRK2, ANGPT1, MST1R, AREG, FGF1, CACNA1A, LCP2	497	224	13528	2.30878	0.979736	0.0847993	2.67911
GOTERM_BP_FAT	GO:0006955~immune response	42	6.74157	0.00156844	CD8A, CD8B, C3, MASP2, VTCN1, SUSD2, GPSM3, TNFSF15, PAX5, CX3CL1, IL7R, SKAP1, TGFB1, CD96, TNFRSF1B, HRH2, POU2F2, FCER1G, INPP5D, FAS, LY75, TLR10, C5AR1, CR2, OLR1, C4A, THEMIS, SLA2, MYLPF, CNGA1, PDCD1LG2, CCL11, CCR9, CBLB, CXCL14, AIRE, TGFBR3, IL12B, TREM2, CLEC5A, PTAFR, LCP2	497	690	13528	1.65683	0.981356	0.0846919	2.73557
GOTERM_BP_FAT	GO:0060193~positive regulation of lipase activity	10	1.60514	0.00162835	GRM5, P2RY6, C5AR1, AGT, RXFP3, P2RY1, HTR2B, PLCB2, NTSR2, HTR2A	497	75	13528	3.62924	0.983989	0.0859595	2.83866
GOTERM_BP_FAT	GO:0000904~cell morphogenesis involved in differentiation	20	3.21027	0.00165922	S100A4, S100A6, CCK, EGR2, KIF5C, MAP1B, NR4A2, NFASC, STXBP1, CABP4, NTN1, TGFB1, NRCAM, CNTN2, TGFBR3, TNN, BMPR1B, SLITRK5, CACNA1A, GFRA3	497	244	13528	2.23109	0.985197	0.0857367	2.89172
GOTERM_BP_FAT	GO:0002460~adaptive immune response based on somatic recombination of immune receptors built from immunoglobulin superfamily domains	10	1.60514	0.00196108	CR2, CD8A, C4A, C3, MASP2, SLA2, FCER1G, FAS, IL12B, INPP5D	497	77	13528	3.53498	0.993127	0.0985523	3.40927
GOTERM_BP_FAT	GO:0002250~adaptive immune response	10	1.60514	0.00196108	CR2, CD8A, C4A, C3, MASP2, SLA2, FCER1G, FAS, IL12B, INPP5D	497	77	13528	3.53498	0.993127	0.0985523	3.40927
GOTERM_BP_FAT	GO:0055080~cation homeostasis	22	3.5313	0.00200682	C5AR1, TRPM8, WFS1, ACO1, RXFP3, SLC12A5, DRD4, TGFB1, PRKCB, CCR9, CCL11, S1PR3, SLC4A11, ALAS2, PTK2B, AGT, RYR3, CACNA1G, STC1, CP, CACNA1A, SLC9A1	497	286	13528	2.09379	0.993881	0.0987822	3.48745
GOTERM_BP_FAT	GO:0048167~regulation of synaptic plasticity	9	1.44462	0.0022485	EGR2, PTGS2, RASGRF1, AGT, MAP1B, CTNND2, VGF, ADORA1, CALB1	497	64	13528	3.82772	0.99669	0.107936	3.89962
GOTERM_BP_FAT	GO:0042110~T cell activation	13	2.08668	0.00227396	IKZF1, CD8A, ELF4, THEMIS, CD3E, CD8B, SLA2, IL7R, TGFB1, CBLB, IL12B, FAS, RHOH	497	126	13528	2.80834	0.996898	0.10707	3.94293
GOTERM_BP_FAT	GO:0030217~T cell differentiation	9	1.44462	0.00248375	CD8A, IKZF1, CD3E, THEMIS, FAS, IL12B, IL7R, TGFB1, RHOH	497	65	13528	3.76883	0.99818	0.114258	4.29922
GOTERM_BP_FAT	GO:0009582~detection of abiotic stimulus	9	1.44462	0.00248375	GUCA1A, RBP4, RRH, GRM6, TRPA1, PDC, CABP4, RCVRN, NR2E3	497	65	13528	3.76883	0.99818	0.114258	4.29922
GOTERM_BP_FAT	GO:0007611~learning or memory	12	1.92616	0.00250122	FOS, EGR2, PTGS2, RASGRF1, GRIA1, CRHBP, GRM7, CTNND2, TMOD2, ATP1A3, CALB1, HTR2A	497	111	13528	2.94263	0.998259	0.112972	4.32883
GOTERM_BP_FAT	GO:0007601~visual perception	18	2.88925	0.00255364	GUCA1A, RBP4, WFS1, NDP, RBP3, RRH, CACNB2, RCVRN, CABP4, NR2E3, PDE6H, CNGA1, CACNA2D4, GABRR2, PPEF2, GRM6, PDC, IMPDH1	497	216	13528	2.26828	0.998477	0.113192	4.41763
GOTERM_BP_FAT	GO:0050953~sensory perception of light stimulus	18	2.88925	0.00255364	GUCA1A, RBP4, WFS1, NDP, RBP3, RRH, CACNB2, RCVRN, CABP4, NR2E3, PDE6H, CNGA1, CACNA2D4, GABRR2, PPEF2, GRM6, PDC, IMPDH1	497	216	13528	2.26828	0.998477	0.113192	4.41763
GOTERM_BP_FAT	GO:0019932~second-messenger-mediated signaling	19	3.04976	0.00260294	ADCY7, RXFP3, DRD4, ADORA1, NTSR2, RCAN2, P2RY12, GRM5, S1PR3, ADRB2, P2RY6, HRH2, AGT, P2RY1, GRM6, RAPGEF4, HTR2B, PTAFR, HTR2A	497	235	13528	2.20071	0.998656	0.113277	4.50108
GOTERM_BP_FAT	GO:0007200~activation of phospholipase C activity by G-protein coupled receptor protein signaling pathway coupled to IP3 second messenger	8	1.28411	0.00273481	GRM5, P2RY6, AGT, RXFP3, P2RY1, HTR2B, NTSR2, HTR2A	497	52	13528	4.18759	0.999039	0.116679	4.72395
GOTERM_BP_FAT	GO:0031175~neuron projection development	20	3.21027	0.00283639	S100A6, CCK, EGR2, KIF5C, MAP1B, NR4A2, NFASC, STXBP1, NTN1, NRCAM, EFHD1, CD44, PTK2B, RASGRF1, CNTN2, TNN, BMPR1B, SLITRK5, CACNA1A, GFRA3	497	256	13528	2.12651	0.999258	0.118758	4.89528
GOTERM_BP_FAT	GO:0002683~negative regulation of immune system process	10	1.60514	0.00329475	INHBA, A2M, CBLB, SLA2, FAS, INPP5D, IL7R, ADORA1, PDCD1LG2, TGFB1	497	83	13528	3.27944	0.999769	0.134419	5.66482
GOTERM_BP_FAT	GO:0006836~neurotransmitter transport	10	1.60514	0.00329475	SLC17A7, GABRA2, SYN1, SLC6A8, SNPH, SYN2, SV2B, SV2C, STX1B, CACNA1A	497	83	13528	3.27944	0.999769	0.134419	5.66482
GOTERM_BP_FAT	GO:0010035~response to inorganic substance	17	2.72873	0.00366339	A2M, PTGS2, OLR1, CRYAB, DUOX2, TRPA1, MAP1B, NR4A2, KCNIP1, CAPN3, PCSK1, FOS, AHRR, UCP2, PTK2B, CACNA1G, HAAO	497	205	13528	2.25721	0.99991	0.145992	6.27946
GOTERM_BP_FAT	GO:0002449~lymphocyte mediated immunity	9	1.44462	0.00396293	CR2, CD8A, C4A, C3, MASP2, SLA2, FCER1G, FAS, INPP5D	497	70	13528	3.49963	0.999958	0.154561	6.7761
GOTERM_BP_FAT	GO:0051606~detection of stimulus	12	1.92616	0.00402524	GUCA1A, RBP4, PPEF2, RRH, GRM6, TRPA1, PDC, CABP4, RCVRN, NR2E3, KCNIP1, PLCB2	497	118	13528	2.76807	0.999964	0.154433	6.8791
GOTERM_BP_FAT	GO:0019724~B cell mediated immunity	8	1.28411	0.00418206	CR2, C4A, C3, MASP2, SLA2, FCER1G, FAS, INPP5D	497	56	13528	3.88847	0.999976	0.157588	7.13785
GOTERM_BP_FAT	GO:0030005~cellular di-, tri-valent inorganic cation homeostasis	18	2.88925	0.004239	C5AR1, TRPM8, WFS1, ACO1, RXFP3, DRD4, TGFB1, PRKCB, CCL11, CCR9, S1PR3, ALAS2, PTK2B, RYR3, CACNA1G, STC1, CP, CACNA1A	497	227	13528	2.15836	0.999979	0.157235	7.23164
GOTERM_BP_FAT	GO:0048667~cell morphogenesis involved in neuron differentiation	17	2.72873	0.00441756	S100A6, CCK, EGR2, KIF5C, MAP1B, NR4A2, NFASC, STXBP1, CABP4, NTN1, NRCAM, CNTN2, TNN, BMPR1B, SLITRK5, CACNA1A, GFRA3	497	209	13528	2.21401	0.999987	0.160965	7.52516
GOTERM_BP_FAT	GO:0051966~regulation of synaptic transmission, glutamatergic	5	0.802568	0.00446239	PTGS2, GRIK3, NTRK2, ADORA1, HTR2A	497	19	13528	7.16298	0.999988	0.160174	7.59871
GOTERM_BP_FAT	GO:0060191~regulation of lipase activity	10	1.60514	0.00452227	GRM5, P2RY6, C5AR1, AGT, RXFP3, P2RY1, HTR2B, PLCB2, NTSR2, HTR2A	497	87	13528	3.12866	0.99999	0.159894	7.69686
GOTERM_BP_FAT	GO:0001775~cell activation	21	3.37079	0.00458902	IKZF1, CD8A, ELF4, CD8B, THEMIS, CD3E, SLA2, STXBP1, CX3CL1, IL7R, SKAP2, TGFB1, P2RY12, CBLB, AGT, FAS, IL12B, IMPDH1, ENTPD2, LCP2, RHOH	497	287	13528	1.99166	0.999991	0.159843	7.80617
GOTERM_BP_FAT	GO:0048535~lymph node development	4	0.642055	0.00484835	TNFRSF11A, IKZF1, IL7R, TGFB1	497	10	13528	10.8877	0.999996	0.165837	8.22967
GOTERM_BP_FAT	GO:0009581~detection of external stimulus	9	1.44462	0.00557323	GUCA1A, RBP4, RRH, GRM6, TRPA1, PDC, CABP4, RCVRN, NR2E3	497	74	13528	3.31046	0.999999	0.185752	9.40374
GOTERM_BP_FAT	GO:0006875~cellular metal ion homeostasis	16	2.56822	0.00576647	C5AR1, TRPM8, WFS1, RXFP3, DRD4, TGFB1, PRKCB, CCL11, CCR9, S1PR3, PTK2B, AGT, RYR3, CACNA1G, STC1, CACNA1A	497	196	13528	2.22198	1	0.18909	9.71432
GOTERM_BP_FAT	GO:0032989~cellular component morphogenesis	26	4.17335	0.00611578	S100A4, S100A6, CCK, ONECUT2, CABP4, IL7R, TGFB1, NRCAM, ANK1, TNN, EGR2, ACTA1, KIF5C, MAP1B, NR4A2, STXBP1, NFASC, NTN1, CAPN3, CNTN2, TGFBR3, BMPR1B, SLITRK5, CACNA1A, GFRA3, TMOD1	497	397	13528	1.78263	1	0.196841	10.2732
GOTERM_BP_FAT	GO:0050805~negative regulation of synaptic transmission	5	0.802568	0.00650276	PTGS2, GRIK3, STXBP1, ADORA1, HTR2A	497	21	13528	6.48079	1	0.205371	10.8886
GOTERM_BP_FAT	GO:0050727~regulation of inflammatory response	9	1.44462	0.00654493	A2M, ADRB2, TNFRSF1B, PTGS2, C3, AGT, FCER1G, CX3CL1, ADORA1	497	76	13528	3.22334	1	0.20404	10.9554
GOTERM_BP_FAT	GO:0007602~phototransduction	6	0.963082	0.00659229	GUCA1A, RRH, PDC, CABP4, RCVRN, NR2E3	497	33	13528	4.94897	1	0.202886	11.0303
GOTERM_BP_FAT	GO:0002684~positive regulation of immune system process	18	2.88925	0.00674031	CR2, C4A, IKZF1, THEMIS, CD3E, MASP2, C3, SLA2, IL7R, SKAP1, PDCD1LG2, TGFB1, CBLB, CD37, FCER1G, IL12B, INPP5D, CD226	497	238	13528	2.0586	1	0.204492	11.2643
GOTERM_BP_FAT	GO:0009611~response to wounding	32	5.13644	0.00692644	A2M, C3, MASP2, ADORA1, TGFB1, MMP25, S1PR3, FOS, PCSK1, GP5, TNFRSF1B, CD44, MEFV, P2RY1, SCNN1B, ENTPD2, LY75, TLR10, CR2, OLR1, C4A, MAP1B, STXBP1, CHST1, EPHA3, CCL11, P2RY12, F5, CX3CR1, PLLP, BMPR1B, PTAFR	497	530	13528	1.64343	1	0.20707	11.5577
GOTERM_BP_FAT	GO:0055066~di-, tri-valent inorganic cation homeostasis	18	2.88925	0.00705693	C5AR1, TRPM8, WFS1, ACO1, RXFP3, DRD4, TGFB1, PRKCB, CCL11, CCR9, S1PR3, ALAS2, PTK2B, RYR3, CACNA1G, STC1, CP, CACNA1A	497	239	13528	2.04999	1	0.208113	11.7628
GOTERM_BP_FAT	GO:0017157~regulation of exocytosis	6	0.963082	0.007501	RAB3C, STXBP1, RAPGEF4, STX1B, NSF, CACNA1A	497	34	13528	4.80341	1	0.217213	12.4575
GOTERM_BP_FAT	GO:0006874~cellular calcium ion homeostasis	15	2.4077	0.0075309	C5AR1, TRPM8, WFS1, RXFP3, DRD4, TGFB1, PRKCB, CCL11, CCR9, S1PR3, PTK2B, RYR3, CACNA1G, STC1, CACNA1A	497	183	13528	2.23109	1	0.215542	12.5041
GOTERM_BP_FAT	GO:0007167~enzyme linked receptor protein signaling pathway	23	3.69181	0.00756432	RET, PTPRD, CD8A, CD8B, CD3E, MET, PTPRT, TGFB1, EPHA3, FOS, EPHB6, ADRB2, EPHA8, PTK2B, NTRK2, TGFBR3, ANGPT1, MST1R, AREG, BMPR1B, FGF1, CACNA1A, LCP2	497	342	13528	1.83054	1	0.213997	12.5562
GOTERM_BP_FAT	GO:0051926~negative regulation of calcium ion transport	4	0.642055	0.00841586	ADRB2, PTGS2, DRD4, TGFB1	497	12	13528	9.07311	1	0.23257	13.8725
GOTERM_BP_FAT	GO:0055065~metal ion homeostasis	16	2.56822	0.00860576	C5AR1, TRPM8, WFS1, RXFP3, DRD4, TGFB1, PRKCB, CCL11, CCR9, S1PR3, PTK2B, AGT, RYR3, CACNA1G, STC1, CACNA1A	497	205	13528	2.12443	1	0.234638	14.1635
GOTERM_BP_FAT	GO:0001764~neuron migration	8	1.28411	0.00872567	NRCAM, SATB2, CCK, MET, NR4A2, CNTN2, NTN1, GFRA3	497	64	13528	3.40241	1	0.235002	14.3468
GOTERM_BP_FAT	GO:0043271~negative regulation of ion transport	5	0.802568	0.00908115	ADRB2, PTGS2, DRD4, TGFB1, HTR2A	497	23	13528	5.91724	1	0.240827	14.888
GOTERM_BP_FAT	GO:0055074~calcium ion homeostasis	15	2.4077	0.00944669	C5AR1, TRPM8, WFS1, RXFP3, DRD4, TGFB1, PRKCB, CCL11, CCR9, S1PR3, PTK2B, RYR3, CACNA1G, STC1, CACNA1A	497	188	13528	2.17175	1	0.246703	15.4411
GOTERM_BP_FAT	GO:0010959~regulation of metal ion transport	9	1.44462	0.00953313	ADRB2, PTGS2, WFS1, DRD4, RCVRN, SCNN1B, ADORA1, TGFB1, HTR2A	497	81	13528	3.02437	1	0.246161	15.5714
GOTERM_BP_FAT	GO:0010648~negative regulation of cell communication	18	2.88925	0.00999586	PTGS2, CD3E, GRIK3, SLA2, ONECUT2, STXBP1, PDE3B, FRZB, ADORA1, RGS14, RGS10, CBLB, ADRB2, AGT, CHST11, INPP5D, HTR2A, RHOH	497	248	13528	1.9756	1	0.253944	16.2656
GOTERM_BP_FAT	GO:0044057~regulation of system process	21	3.37079	0.0100943	CCK, EGR2, PTGS2, GRIK3, MAP1B, DRD4, CTNND2, STXBP1, VGF, ADORA1, CALB1, INHBA, ADRB2, RASGRF1, AGT, NTRK2, CACNA1G, GUCY1A3, HCN4, CACNA1A, HTR2A	497	309	13528	1.84986	1	0.2536	16.4127
GOTERM_BP_FAT	GO:0033273~response to vitamin	8	1.28411	0.0102788	ALDH1A2, RBP4, PTGS2, CD44, GDAP1, MAP1B, ANGPT1, TGFB1	497	66	13528	3.29931	1	0.255111	16.6875
GOTERM_BP_FAT	GO:0006952~defense response	35	5.61798	0.0110471	A2M, CCK, C3, MASP2, DRD4, CX3CL1, ADORA1, TGFB1, MMP25, S1PR3, FOS, TNFRSF1B, CD44, MEFV, LY75, ITK, TLR10, CR2, C5AR1, OLR1, C4A, HCK, CHST1, EPHA3, CCL11, CCR9, CD84, LSP1, INHBA, GRM7, CX3CR1, MST1R, BMPR1B, CLEC5A, PTAFR	497	615	13528	1.54907	1	0.268851	17.8229
GOTERM_BP_FAT	GO:0007409~axonogenesis	15	2.4077	0.011727	S100A6, CCK, EGR2, KIF5C, MAP1B, NR4A2, NFASC, STXBP1, NTN1, NRCAM, CNTN2, TNN, BMPR1B, SLITRK5, GFRA3	497	193	13528	2.11549	1	0.280264	18.8156
GOTERM_BP_FAT	GO:0002697~regulation of immune effector process	10	1.60514	0.0117738	RBP4, A2M, CD37, C3, CD8B, FCER1G, IL12B, IL7R, CD226, TGFB1	497	101	13528	2.69498	1	0.278628	18.8834
GOTERM_BP_FAT	GO:0048812~neuron projection morphogenesis	16	2.56822	0.0119622	S100A6, CCK, EGR2, KIF5C, MAP1B, NR4A2, NFASC, STXBP1, NTN1, NRCAM, CNTN2, TNN, BMPR1B, SLITRK5, CACNA1A, GFRA3	497	213	13528	2.04464	1	0.279848	19.1564
GOTERM_BP_FAT	GO:0000902~cell morphogenesis	23	3.69181	0.0119662	S100A4, S100A6, CCK, EGR2, ONECUT2, KIF5C, MAP1B, NR4A2, NFASC, STXBP1, CABP4, IL7R, NTN1, TGFB1, NRCAM, ANK1, CNTN2, TGFBR3, TNN, BMPR1B, SLITRK5, CACNA1A, GFRA3	497	356	13528	1.75855	1	0.277406	19.1621
GOTERM_BP_FAT	GO:0051970~negative regulation of transmission of nerve impulse	5	0.802568	0.012247	PTGS2, GRIK3, STXBP1, ADORA1, HTR2A	497	25	13528	5.44386	1	0.280414	19.5672
GOTERM_BP_FAT	GO:0016477~cell migration	19	3.04976	0.0131628	SATB2, RET, CCK, MET, ASTN1, NR4A2, CX3CL1, NTN1, TGFB1, NRCAM, CD44, PTK2B, CNTN2, TGFBR3, LHX6, TNN, IL12B, SCNN1B, GFRA3	497	276	13528	1.87379	1	0.295428	20.8747
GOTERM_BP_FAT	GO:0033555~multicellular organismal response to stress	6	0.963082	0.0133699	CCK, GRM7, DRD4, TRPA1, CACNA1A, KCNIP3	497	39	13528	4.18759	1	0.296751	21.1677
GOTERM_BP_FAT	GO:0007613~memory	6	0.963082	0.0133699	PTGS2, RASGRF1, GRIA1, GRM7, ATP1A3, HTR2A	497	39	13528	4.18759	1	0.296751	21.1677
GOTERM_BP_FAT	GO:0002443~leukocyte mediated immunity	9	1.44462	0.0134349	CR2, CD8A, C4A, C3, MASP2, SLA2, FCER1G, FAS, INPP5D	497	86	13528	2.84853	1	0.295423	21.2594
GOTERM_BP_FAT	GO:0007242~intracellular signaling cascade	62	9.95185	0.013709	ADCY7, TNFSF15, RASGEF1A, ADORA1, PGR, S1PR3, DIRAS2, GUCY1A3, RAPGEF4, FGF1, PLCB2, DDAH1, RHOH, ARHGEF4, RET, C5AR1, CRYAB, SLA2, RXFP3, MLXIPL, WNK2, NTSR2, PRKCB, GRM5, ADRB2, MAST1, KSR2, RASGRF1, GRM6, ASB2, PTAFR, RASD2, PLCXD3, RAB3C, MRAS, DRD4, ASB18, ALDH1A2, P2RY6, STAT4, DGKB, HRH2, PTK2B, AGT, P2RY1, INPP5D, ITK, TLR10, MET, BMX, PDE6H, RCAN2, RERG, P2RY12, CBLB, NPHS1, ADRA1A, TGFB…	497	1256	13528	1.34363	1	0.297944	21.6451
GOTERM_BP_FAT	GO:0051250~negative regulation of lymphocyte activation	7	1.1236	0.0137293	INHBA, CBLB, SLA2, FAS, INPP5D, PDCD1LG2, TGFB1	497	54	13528	3.52843	1	0.295822	21.6735
GOTERM_BP_FAT	GO:0031667~response to nutrient levels	15	2.4077	0.0138427	ALDH1A2, PCSK1, RBP4, A2M, CCK, CD44, PTGS2, ALB, GDAP1, MAP1B, HRK, STC1, ANGPT1, CP, TGFB1	497	197	13528	2.07254	1	0.295412	21.8326
GOTERM_BP_FAT	GO:0051345~positive regulation of hydrolase activity	14	2.24719	0.0147004	CCK, C5AR1, RXFP3, TNFSF15, NTSR2, GRM5, P2RY6, PTK2B, RASGRF1, AGT, P2RY1, HTR2B, PLCB2, HTR2A	497	179	13528	2.12889	1	0.308126	23.0252
GOTERM_BP_FAT	GO:0046903~secretion	20	3.21027	0.0147868	DRD4, STXBP1, AQP4, VGF, ADORA1, ANK1, SYN1, STXBP5, AGT, SNPH, NPHS1, SYN2, NTRK2, SLC22A4, SYTL5, RAPGEF4, SCNN1B, DOC2B, CACNA1A, LCP2	497	300	13528	1.81462	1	0.307145	23.1444
GOTERM_BP_FAT	GO:0046649~lymphocyte activation	15	2.4077	0.0150055	IKZF1, CD8A, ELF4, CD8B, THEMIS, CD3E, SLA2, SKAP2, IL7R, TGFB1, CBLB, IL12B, FAS, IMPDH1, RHOH	497	199	13528	2.05171	1	0.308451	23.4452
GOTERM_BP_FAT	GO:0048015~phosphoinositide-mediated signaling	9	1.44462	0.0152834	GRM5, P2RY6, AGT, RXFP3, P2RY1, HTR2B, NTSR2, PTAFR, HTR2A	497	88	13528	2.78379	1	0.310733	23.826
GOTERM_BP_FAT	GO:0043010~camera-type eye development	10	1.60514	0.0167052	ALDH1A2, RBP4, CRYGS, IKZF1, CRYAB, CABP4, HSF4, NR2E3, BMPR1B, NHS	497	107	13528	2.54386	1	0.331821	25.7464
GOTERM_BP_FAT	GO:0006954~inflammatory response	21	3.37079	0.0167462	LY75, A2M, TLR10, CR2, C4A, OLR1, MASP2, C3, ADORA1, MMP25, TGFB1, CHST1, EPHA3, CCL11, FOS, S1PR3, TNFRSF1B, MEFV, CD44, BMPR1B, PTAFR	497	325	13528	1.75879	1	0.329962	25.8011
GOTERM_BP_FAT	GO:0045321~leukocyte activation	17	2.72873	0.0167666	IKZF1, CD8A, ELF4, CD8B, THEMIS, CD3E, SLA2, CX3CL1, SKAP2, IL7R, TGFB1, CBLB, FAS, IL12B, IMPDH1, RHOH, LCP2	497	242	13528	1.9121	1	0.3278	25.8282
GOTERM_BP_FAT	GO:0006865~amino acid transport	9	1.44462	0.0173095	SLC6A8, SLC1A6, SLC22A4, XK, SLC36A4, SLC7A14, PDZK1, SLC43A2, CACNA1A	497	90	13528	2.72193	1	0.333963	26.5486
GOTERM_BP_FAT	GO:0002695~negative regulation of leukocyte activation	7	1.1236	0.017607	INHBA, CBLB, SLA2, FAS, INPP5D, PDCD1LG2, TGFB1	497	57	13528	3.34272	1	0.336149	26.9405
GOTERM_BP_FAT	GO:0043270~positive regulation of ion transport	6	0.963082	0.0180695	P2RY12, ADRB2, WFS1, P2RY1, ADORA1, PDZK1	497	42	13528	3.88847	1	0.340828	27.5459
GOTERM_BP_FAT	GO:0048870~cell motility	20	3.21027	0.0181759	SATB2, RET, CCK, MET, ASTN1, NR4A2, CX3CL1, NTN1, DNAH8, TGFB1, NRCAM, CD44, PTK2B, CNTN2, TGFBR3, LHX6, TNN, IL12B, SCNN1B, GFRA3	497	307	13528	1.77325	1	0.339992	27.6845
GOTERM_BP_FAT	GO:0051674~localization of cell	20	3.21027	0.0181759	SATB2, RET, CCK, MET, ASTN1, NR4A2, CX3CL1, NTN1, DNAH8, TGFB1, NRCAM, CD44, PTK2B, CNTN2, TGFBR3, LHX6, TNN, IL12B, SCNN1B, GFRA3	497	307	13528	1.77325	1	0.339992	27.6845
GOTERM_BP_FAT	GO:0031645~negative regulation of neurological system process	5	0.802568	0.0181878	PTGS2, GRIK3, STXBP1, ADORA1, HTR2A	497	28	13528	4.86059	1	0.337742	27.7
GOTERM_BP_FAT	GO:0009110~vitamin biosynthetic process	5	0.802568	0.0181878	ALDH1A2, HAAO, PNPO, KMO, PSAT1	497	28	13528	4.86059	1	0.337742	27.7
GOTERM_BP_FAT	GO:0048858~cell projection morphogenesis	17	2.72873	0.0186083	S100A6, CCK, EGR2, ONECUT2, KIF5C, MAP1B, NR4A2, NFASC, STXBP1, NTN1, NRCAM, CNTN2, TNN, BMPR1B, SLITRK5, CACNA1A, GFRA3	497	245	13528	1.88869	1	0.34165	28.2453
GOTERM_BP_FAT	GO:0048511~rhythmic process	11	1.76565	0.0192899	PGR, DDC, INHBA, NPAS2, EGR2, PTGDS, NR1D1, AGT, ANGPT1, BMPR1B, VGF	497	128	13528	2.33916	1	0.349302	29.1208
GOTERM_BP_FAT	GO:0030802~regulation of cyclic nucleotide biosynthetic process	10	1.60514	0.0196713	S1PR3, GUCA1A, ADRB2, ADCY7, GRM7, GRM6, DRD4, NTRK2, GUCY1A3, ADORA1	497	110	13528	2.47448	1	0.35242	29.6063
GOTERM_BP_FAT	GO:0030808~regulation of nucleotide biosynthetic process	10	1.60514	0.0196713	S1PR3, GUCA1A, ADRB2, ADCY7, GRM7, GRM6, DRD4, NTRK2, GUCY1A3, ADORA1	497	110	13528	2.47448	1	0.35242	29.6063
GOTERM_BP_FAT	GO:0030799~regulation of cyclic nucleotide metabolic process	10	1.60514	0.0230008	S1PR3, GUCA1A, ADRB2, ADCY7, GRM7, GRM6, DRD4, NTRK2, GUCY1A3, ADORA1	497	113	13528	2.40879	1	0.396234	33.7134
GOTERM_BP_FAT	GO:0001654~eye development	11	1.76565	0.0233535	ALDH1A2, RBP4, CRYGS, IKZF1, CRYAB, NTRK2, CABP4, HSF4, NR2E3, BMPR1B, NHS	497	132	13528	2.26828	1	0.398336	34.135
GOTERM_BP_FAT	GO:0016049~cell growth	7	1.1236	0.0238619	ACTA1, TGFBR3, TNN, IL7R, CACNA1A, TGFB1, SLC9A1	497	61	13528	3.12353	1	0.402432	34.7383
GOTERM_BP_FAT	GO:0050866~negative regulation of cell activation	7	1.1236	0.0238619	INHBA, CBLB, SLA2, FAS, INPP5D, PDCD1LG2, TGFB1	497	61	13528	3.12353	1	0.402432	34.7383
GOTERM_BP_FAT	GO:0007626~locomotory behavior	18	2.88925	0.0243531	C5AR1, DRD4, ASTN1, NR4A2, ATP1A3, CX3CL1, CALB1, ESPN, CCL11, CCR9, NPAS2, PTGDS, CXCL14, CX3CR1, GRM6, RASD2, PTAFR, CACNA1A	497	274	13528	1.78813	1	0.406215	35.3162
GOTERM_BP_FAT	GO:0060627~regulation of vesicle-mediated transport	9	1.44462	0.0245383	RAB3C, C3, STXBP1, GTF2A1L, RAPGEF4, STX1B, NSF, CACNA1A, TGFB1	497	96	13528	2.55181	1	0.40602	35.5327
GOTERM_BP_FAT	GO:0051967~negative regulation of synaptic transmission, glutamatergic	3	0.481541	0.0249275	GRIK3, ADORA1, HTR2A	497	7	13528	11.6654	1	0.408409	35.9858
GOTERM_BP_FAT	GO:0007216~metabotropic glutamate receptor signaling pathway	3	0.481541	0.0249275	GRM5, GRIK3, GRM6	497	7	13528	11.6654	1	0.408409	35.9858
GOTERM_BP_FAT	GO:0006959~humoral immune response	8	1.28411	0.0255833	CR2, C4A, C3, MASP2, POU2F2, AIRE, PAX5, TREM2	497	79	13528	2.75639	1	0.414066	36.7423
GOTERM_BP_FAT	GO:0032990~cell part morphogenesis	17	2.72873	0.0264883	S100A6, CCK, EGR2, ONECUT2, KIF5C, MAP1B, NR4A2, NFASC, STXBP1, NTN1, NRCAM, CNTN2, TNN, BMPR1B, SLITRK5, CACNA1A, GFRA3	497	256	13528	1.80753	1	0.422617	37.7725
GOTERM_BP_FAT	GO:0050869~negative regulation of B cell activation	4	0.642055	0.0265289	INHBA, SLA2, FAS, INPP5D	497	18	13528	6.04874	1	0.420565	37.8184
GOTERM_BP_FAT	GO:0042551~neuron maturation	4	0.642055	0.0265289	NRCAM, RET, NR4A2, LGI4	497	18	13528	6.04874	1	0.420565	37.8184
GOTERM_BP_FAT	GO:0006140~regulation of nucleotide metabolic process	10	1.60514	0.0267149	S1PR3, GUCA1A, ADRB2, ADCY7, GRM7, GRM6, DRD4, NTRK2, GUCY1A3, ADORA1	497	116	13528	2.34649	1	0.420285	38.0279
GOTERM_BP_FAT	GO:0030097~hemopoiesis	16	2.56822	0.0276166	IKZF1, CD8A, THEMIS, CD3E, IL7R, TGFB1, INHBA, ALAS2, AHSP, RTKN2, TGFBR3, IL12B, FAS, THPO, KIRREL3, RHOH	497	236	13528	1.84538	1	0.428472	39.0347
GOTERM_BP_FAT	GO:0006928~cell motion	27	4.33387	0.0276965	CCK, PTGS2, ASTN1, CX3CL1, DNAH8, TGFB1, NRCAM, CD44, PTK2B, TNN, LHX6, SCNN1B, SATB2, RET, EGR2, KIF5C, MET, NR4A2, NFASC, NTN1, LSP1, CNTN2, TGFBR3, MST1R, IL12B, BMPR1B, GFRA3	497	475	13528	1.5472	1	0.426902	39.1232
GOTERM_BP_FAT	GO:0031279~regulation of cyclase activity	9	1.44462	0.0288483	S1PR3, GUCA1A, ADRB2, ADCY7, GRM7, GRM6, DRD4, NTRK2, ADORA1	497	99	13528	2.47448	1	0.437686	40.3849
GOTERM_BP_FAT	GO:0015837~amine transport	10	1.60514	0.0294146	SLC6A8, SLC1A6, SLC22A4, XK, SLC36A4, SLC7A14, PDZK1, SLC43A2, CACNA1A, CRYM	497	118	13528	2.30672	1	0.441583	40.9962
GOTERM_BP_FAT	GO:0030030~cell projection organization	22	3.5313	0.0302674	S100A6, CCK, EGR2, ONECUT2, KIF5C, MAP1B, NR4A2, ITGB4, NFASC, STXBP1, NTN1, NRCAM, EFHD1, CD44, PTK2B, RASGRF1, CNTN2, TNN, BMPR1B, SLITRK5, CACNA1A, GFRA3	497	368	13528	1.62724	1	0.448562	41.9057
GOTERM_BP_FAT	GO:0048534~hemopoietic or lymphoid organ development	17	2.72873	0.0302757	IKZF1, CD8A, THEMIS, CD3E, IL7R, TGFB1, INHBA, TNFRSF11A, ALAS2, AHSP, RTKN2, TGFBR3, IL12B, FAS, THPO, KIRREL3, RHOH	497	260	13528	1.77972	1	0.44616	41.9144
GOTERM_BP_FAT	GO:0009416~response to light stimulus	11	1.76565	0.0305589	GUCA1A, FOS, RBP4, RRH, GRM6, PDC, ATP1A3, CABP4, RCVRN, NR2E3, IL12B	497	138	13528	2.16966	1	0.446786	42.2135
GOTERM_BP_FAT	GO:0008284~positive regulation of cell proliferation	24	3.85233	0.0314422	S100A6, E2F3, PTGS2, CD3E, IL34, NTN1, PDCD1LG2, TGFB1, ALDH1A2, S1PR3, ADRB2, TNFRSF11A, ATF3, OSR2, PTK2B, ZMIZ1, AGT, RTKN2, MST1R, HSF4, IL12B, FGF1, THPO, HTR2A	497	414	13528	1.57793	1	0.453843	43.1368
GOTERM_BP_FAT	GO:0051339~regulation of lyase activity	9	1.44462	0.0319959	S1PR3, GUCA1A, ADRB2, ADCY7, GRM7, GRM6, DRD4, NTRK2, ADORA1	497	101	13528	2.42548	1	0.457255	43.7085
GOTERM_BP_FAT	GO:0009314~response to radiation	14	2.24719	0.0329326	GUCA1A, RBP4, RRH, ATP1A3, CABP4, RCVRN, NR2E3, XRRA1, TGFB1, CCL11, FOS, GRM6, PDC, IL12B	497	200	13528	1.90535	1	0.464568	44.6633
GOTERM_BP_FAT	GO:0042593~glucose homeostasis	6	0.963082	0.0329388	RBP4, WFS1, MLXIPL, PDE3B, CACNA1E, VGF	497	49	13528	3.33298	1	0.462185	44.6696
GOTERM_BP_FAT	GO:0033500~carbohydrate homeostasis	6	0.963082	0.0329388	RBP4, WFS1, MLXIPL, PDE3B, CACNA1E, VGF	497	49	13528	3.33298	1	0.462185	44.6696
GOTERM_BP_FAT	GO:0007584~response to nutrient	11	1.76565	0.0332759	ALDH1A2, RBP4, A2M, PTGS2, CD44, GDAP1, MAP1B, STC1, ANGPT1, CP, TGFB1	497	140	13528	2.13866	1	0.463214	45.0094
GOTERM_BP_FAT	GO:0009123~nucleoside monophosphate metabolic process	7	1.1236	0.0335714	ADCY7, PDE4A, PDE3B, GUCY1A3, PDE8B, IMPDH1, PRPS2	497	66	13528	2.8869	1	0.463807	45.3057
GOTERM_BP_FAT	GO:0030098~lymphocyte differentiation	9	1.44462	0.0353703	CD8A, IKZF1, CD3E, THEMIS, FAS, IL12B, IL7R, TGFB1, RHOH	497	103	13528	2.37839	1	0.479294	47.077
GOTERM_BP_FAT	GO:0040007~growth	13	2.08668	0.0372412	TAL2, INHBA, PTGS2, ACTA1, ZMIZ1, CHST11, TGFBR3, TNN, IL7R, BMPR1B, CACNA1A, TGFB1, SLC9A1	497	183	13528	1.93361	1	0.494837	48.8618
GOTERM_BP_FAT	GO:0031016~pancreas development	5	0.802568	0.0381033	ALDH1A2, PCSK1, ONECUT2, PDE3B, NKX6-1	497	35	13528	3.88847	1	0.500461	49.6649
GOTERM_BP_FAT	GO:0060041~retina development in camera-type eye	5	0.802568	0.0381033	RBP4, IKZF1, CABP4, NR2E3, BMPR1B	497	35	13528	3.88847	1	0.500461	49.6649
GOTERM_BP_FAT	GO:0001659~temperature homeostasis	4	0.642055	0.0398918	ADRB2, ADORA1, HTR2A, EPHA3	497	21	13528	5.18463	1	0.514334	51.2933
GOTERM_BP_FAT	GO:0008361~regulation of cell size	14	2.24719	0.0402959	RERG, INHBA, ACTA1, CRYAB, PTK2B, AGT, MAP1B, TGFBR3, TNN, IL7R, NTN1, TGFB1, CACNA1A, SLC9A1	497	206	13528	1.84986	1	0.515499	51.6543
GOTERM_BP_FAT	GO:0046660~female sex differentiation	7	1.1236	0.040469	PGR, INHBA, RBP4, AGT, ANGPT1, BMPR1B, VGF	497	69	13528	2.76138	1	0.514606	51.8082
GOTERM_BP_FAT	GO:0046545~development of primary female sexual characteristics	7	1.1236	0.040469	PGR, INHBA, RBP4, AGT, ANGPT1, BMPR1B, VGF	497	69	13528	2.76138	1	0.514606	51.8082
GOTERM_BP_FAT	GO:0043383~negative T cell selection	3	0.481541	0.0407119	CD3E, THEMIS, FAS	497	9	13528	9.07311	1	0.514338	52.0233
GOTERM_BP_FAT	GO:0050778~positive regulation of immune response	11	1.76565	0.0407986	CR2, C4A, C3, MASP2, CD3E, THEMIS, SLA2, FCER1G, IL12B, CD226, SKAP1	497	145	13528	2.06491	1	0.512707	52.0998
GOTERM_BP_FAT	GO:0042445~hormone metabolic process	9	1.44462	0.0408701	ALDH1A2, RBP4, PCSK1, DIO2, CRHBP, AGT, DUOX2, CACNA1A, CRYM	497	106	13528	2.31107	1	0.510959	52.1629
GOTERM_BP_FAT	GO:0032535~regulation of cellular component size	17	2.72873	0.041748	ACTA1, SPTBN5, CRYAB, MAP1B, IL7R, NTN1, TGFB1, NEBL, RERG, INHBA, PTK2B, AGT, TGFBR3, TNN, CACNA1A, SPTB, SLC9A1	497	271	13528	1.70748	1	0.516209	52.9308
GOTERM_BP_FAT	GO:0002694~regulation of leukocyte activation	12	1.92616	0.0421092	INHBA, CBLB, IKZF1, CD3E, SLA2, FAS, IL12B, INPP5D, IL7R, CD226, PDCD1LG2, TGFB1	497	166	13528	1.96766	1	0.516951	53.2432
GOTERM_BP_FAT	GO:0007423~sensory organ development	15	2.4077	0.0426755	RBP4, CRYGS, IKZF1, MAFB, CRYAB, TMIE, KRT13, CABP4, NR2E3, NHS, TGFB1, ALDH1A2, NTRK2, HSF4, BMPR1B	497	229	13528	1.78292	1	0.519416	53.7293
GOTERM_BP_FAT	GO:0009719~response to endogenous stimulus	23	3.69181	0.0429594	RBP4, A2M, EGR2, PTGS2, ADCY7, ACTA1, CRYAB, MAP1B, DRD4, NR4A2, PDE3B, PTPRN, MMP3, VGF, TGFB1, RERG, PCSK1, ALDH1A2, FOS, PTK2B, TGFBR3, ANGPT1, FAS	497	405	13528	1.54579	1	0.519479	53.9712
GOTERM_BP_FAT	GO:0046942~carboxylic acid transport	11	1.76565	0.04411	SLC16A4, SLC6A8, SLC1A6, DRD4, SLC22A4, XK, SLC36A4, SLC7A14, PDZK1, SLC43A2, CACNA1A	497	147	13528	2.03682	1	0.526707	54.9393
GOTERM_BP_FAT	GO:0006796~phosphate metabolic process	47	7.54414	0.044913	CDK18, PDP2, DRD4, SYNJ1, ATP6V1B2, ADORA1, TGFB1, CAMKV, EPHB6, STAT4, PTK2B, AAK1, LMTK3, INPP5D, ATP6, ITK, TRPM6, RET, PTPRD, C5AR1, ND4, ND5, MYLK3, PTPN5, HCK, MET, BMX, PTPRT, WNK2, PDE6H, PTPRN, PRKCB, EPHA3, CCL11, MAST1, KSR2, CAMK4, PLK2, PPEF2, PPM1J, EPHA8, PPM1K, NTRK2, SLC17A2, TGFBR3, MST1R, BMPR1B	497	973	13528	1.31481	1	0.530942	55.6035
GOTERM_BP_FAT	GO:0006793~phosphorus metabolic process	47	7.54414	0.044913	CDK18, PDP2, DRD4, SYNJ1, ATP6V1B2, ADORA1, TGFB1, CAMKV, EPHB6, STAT4, PTK2B, AAK1, LMTK3, INPP5D, ATP6, ITK, TRPM6, RET, PTPRD, C5AR1, ND4, ND5, MYLK3, PTPN5, HCK, MET, BMX, PTPRT, WNK2, PDE6H, PTPRN, PRKCB, EPHA3, CCL11, MAST1, KSR2, CAMK4, PLK2, PPEF2, PPM1J, EPHA8, PPM1K, NTRK2, SLC17A2, TGFBR3, MST1R, BMPR1B	497	973	13528	1.31481	1	0.530942	55.6035
GOTERM_BP_FAT	GO:0003012~muscle system process	12	1.92616	0.0452536	ACTA1, MYBPC1, SLC6A8, CRYAB, MYH3, AGT, RYR3, CACNA1G, GUCY1A3, ADRA1A, HCN4, SGCA	497	168	13528	1.94424	1	0.531389	55.8825
GOTERM_BP_FAT	GO:0031214~biomineral formation	5	0.802568	0.0454182	AMBN, PTGS2, DMP1, GPNMB, PHEX	497	37	13528	3.67829	1	0.530425	56.0167
GOTERM_BP_FAT	GO:0051249~regulation of lymphocyte activation	11	1.76565	0.0458323	INHBA, CBLB, IKZF1, CD3E, SLA2, FAS, IL12B, INPP5D, IL7R, PDCD1LG2, TGFB1	497	148	13528	2.02306	1	0.531455	56.3526
GOTERM_BP_FAT	GO:0015849~organic acid transport	11	1.76565	0.0458323	SLC16A4, SLC6A8, SLC1A6, DRD4, SLC22A4, XK, SLC36A4, SLC7A14, PDZK1, SLC43A2, CACNA1A	497	148	13528	2.02306	1	0.531455	56.3526
GOTERM_BP_FAT	GO:0016064~immunoglobulin mediated immune response	6	0.963082	0.0471755	CR2, C4A, C3, MASP2, FCER1G, INPP5D	497	54	13528	3.02437	1	0.539732	57.4257
GOTERM_BP_FAT	GO:0002706~regulation of lymphocyte mediated immunity	6	0.963082	0.0471755	C3, FCER1G, IL12B, IL7R, CD226, TGFB1	497	54	13528	3.02437	1	0.539732	57.4257
GOTERM_BP_FAT	GO:0019228~regulation of action potential in neuron	6	0.963082	0.0471755	EGR2, LGI4, PLLP, SCN8A, TGFB1, ACSBG1	497	54	13528	3.02437	1	0.539732	57.4257
GOTERM_BP_FAT	GO:0002520~immune system development	17	2.72873	0.0475504	IKZF1, CD8A, THEMIS, CD3E, IL7R, TGFB1, INHBA, TNFRSF11A, ALAS2, AHSP, RTKN2, TGFBR3, IL12B, FAS, THPO, KIRREL3, RHOH	497	276	13528	1.67655	1	0.540375	57.7208
GOTERM_BP_FAT	GO:0042127~regulation of cell proliferation	39	6.26003	0.0491995	RBP4, E2F3, S100A6, PTGS2, TNFSF15, NR2E3, IL34, SKAP2, ADORA1, TGFB1, PGR, S1PR3, ALDH1A2, OSR2, TNFRSF11A, PTK2B, AGT, CHST11, RTKN2, INPP5D, HSF4, FGF1, GPNMB, THPO, PTGER2, CD3E, NTN1, PDCD1LG2, RERG, TNFRSF9, ADRB2, CBLB, ATF3, ZMIZ1, ADRA1A, TGFBR3, MST1R, IL12B, HTR2A	497	787	13528	1.34886	1	0.550654	58.9957
GOTERM_BP_FAT	GO:0042552~myelination	5	0.802568	0.0493488	EGR2, LGI4, PLLP, TGFB1, ACSBG1	497	38	13528	3.58149	1	0.549533	59.1094
GOTERM_BP_FAT	GO:0009187~cyclic nucleotide metabolic process	5	0.802568	0.0493488	ADCY7, PDE4A, PDE3B, GUCY1A3, PDE8B	497	38	13528	3.58149	1	0.549533	59.1094
GOTERM_BP_FAT	GO:0019935~cyclic-nucleotide-mediated signaling	10	1.60514	0.049677	P2RY12, S1PR3, ADRB2, ADCY7, HRH2, AGT, GRM6, DRD4, RAPGEF4, ADORA1	497	130	13528	2.09379	1	0.549751	59.3581
GOTERM_BP_FAT	GO:0043266~regulation of potassium ion transport	3	0.481541	0.0496778	ADRB2, ADORA1, HTR2A	497	10	13528	8.16579	1	0.547548	59.3588
GOTERM_BP_FAT	GO:0020027~hemoglobin metabolic process	3	0.481541	0.0496778	INHBA, ALAS2, AHSP	497	10	13528	8.16579	1	0.547548	59.3588
GOTERM_BP_FAT	GO:0015695~organic cation transport	4	0.642055	0.0503548	SLC22A13, SLC12A5, SLC22A4, PDZK1	497	23	13528	4.73379	1	0.550339	59.8673
GOTERM_BP_FAT	GO:0042364~water-soluble vitamin biosynthetic process	4	0.642055	0.0503548	HAAO, PNPO, KMO, PSAT1	497	23	13528	4.73379	1	0.550339	59.8673
GOTERM_BP_FAT	GO:0007194~negative regulation of adenylate cyclase activity	6	0.963082	0.0503983	S1PR3, ADCY7, GRM7, GRM6, DRD4, ADORA1	497	55	13528	2.96938	1	0.548473	59.8998
GOTERM_BP_FAT	GO:0031280~negative regulation of cyclase activity	6	0.963082	0.0503983	S1PR3, ADCY7, GRM7, GRM6, DRD4, ADORA1	497	55	13528	2.96938	1	0.548473	59.8998
GOTERM_BP_FAT	GO:0051350~negative regulation of lyase activity	6	0.963082	0.0503983	S1PR3, ADCY7, GRM7, GRM6, DRD4, ADORA1	497	55	13528	2.96938	1	0.548473	59.8998
GOTERM_BP_FAT	GO:0010817~regulation of hormone levels	11	1.76565	0.05127	ALDH1A2, RBP4, PCSK1, DIO2, CRHBP, AGT, DUOX2, RAPGEF4, VGF, CACNA1A, CRYM	497	151	13528	1.98286	1	0.552629	60.5453
GOTERM_BP_FAT	GO:0007156~homophilic cell adhesion	10	1.60514	0.0516978	CD84, AMIGO2, PCDH1, RET, PCDHB5, CDH18, CDH19, PCDHGC5, PTPRT, CDH10	497	131	13528	2.07781	1	0.553538	60.8585
GOTERM_BP_FAT	GO:0015698~inorganic anion transport	8	1.28411	0.0544471	SLC17A7, P2RY6, GABRA2, SLC4A11, CLIC4, SLC17A1, GLRA3, SLC12A5	497	93	13528	2.34145	1	0.570634	62.816
GOTERM_BP_FAT	GO:0006936~muscle contraction	11	1.76565	0.0551244	ACTA1, MYBPC1, SLC6A8, CRYAB, MYH3, AGT, RYR3, CACNA1G, ADRA1A, HCN4, SGCA	497	153	13528	1.95694	1	0.573098	63.2839
GOTERM_BP_FAT	GO:0002712~regulation of B cell mediated immunity	4	0.642055	0.0560358	C3, FCER1G, CD226, TGFB1	497	24	13528	4.53655	1	0.57709	63.9046
GOTERM_BP_FAT	GO:0002889~regulation of immunoglobulin mediated immune response	4	0.642055	0.0560358	C3, FCER1G, CD226, TGFB1	497	24	13528	4.53655	1	0.57709	63.9046
GOTERM_BP_FAT	GO:0000302~response to reactive oxygen species	7	1.1236	0.056789	FOS, OLR1, PTK2B, CRYAB, UCP2, TRPA1, DUOX2	497	75	13528	2.54047	1	0.57996	64.4102
GOTERM_BP_FAT	GO:0048469~cell maturation	7	1.1236	0.056789	NRCAM, PGR, RET, PTK2B, NR4A2, LGI4, LHX6	497	75	13528	2.54047	1	0.57996	64.4102
GOTERM_BP_FAT	GO:0006766~vitamin metabolic process	7	1.1236	0.056789	ALDH1A2, RBP4, SLC22A4, HAAO, PNPO, KMO, PSAT1	497	75	13528	2.54047	1	0.57996	64.4102
GOTERM_BP_FAT	GO:0002253~activation of immune response	8	1.28411	0.0570635	CR2, C4A, C3, MASP2, CD3E, THEMIS, SLA2, SKAP1	497	94	13528	2.31654	1	0.579645	64.5928
GOTERM_BP_FAT	GO:0050865~regulation of cell activation	12	1.92616	0.0575138	INHBA, CBLB, IKZF1, CD3E, SLA2, FAS, IL12B, INPP5D, IL7R, CD226, PDCD1LG2, TGFB1	497	175	13528	1.86647	1	0.580483	64.8904
GOTERM_BP_FAT	GO:0006767~water-soluble vitamin metabolic process	5	0.802568	0.0577528	SLC22A4, HAAO, PNPO, KMO, PSAT1	497	40	13528	3.40241	1	0.579939	65.0473
GOTERM_BP_FAT	GO:0007193~inhibition of adenylate cyclase activity by G-protein signaling	5	0.802568	0.0577528	S1PR3, ADCY7, GRM6, DRD4, ADORA1	497	40	13528	3.40241	1	0.579939	65.0473
GOTERM_BP_FAT	GO:0002252~immune effector process	10	1.60514	0.0580806	CR2, CD8A, C4A, C3, MASP2, SLA2, FCER1G, FAS, INPP5D, IL7R	497	134	13528	2.03129	1	0.579977	65.2616
GOTERM_BP_FAT	GO:0002891~positive regulation of immunoglobulin mediated immune response	3	0.481541	0.0592759	C3, FCER1G, CD226	497	11	13528	7.42345	1	0.585557	66.0324
GOTERM_BP_FAT	GO:0002714~positive regulation of B cell mediated immunity	3	0.481541	0.0592759	C3, FCER1G, CD226	497	11	13528	7.42345	1	0.585557	66.0324
GOTERM_BP_FAT	GO:0019933~cAMP-mediated signaling	8	1.28411	0.0597565	P2RY12, S1PR3, ADRB2, ADCY7, GRM6, DRD4, RAPGEF4, ADORA1	497	95	13528	2.29215	1	0.586529	66.3378
GOTERM_BP_FAT	GO:0051051~negative regulation of transport	10	1.60514	0.0603161	INHBA, ADRB2, PTGS2, CRYAB, GRM7, DRD4, PDE8B, ADORA1, TGFB1, HTR2A	497	135	13528	2.01625	1	0.587984	66.69
GOTERM_BP_FAT	GO:0007187~G-protein signaling, coupled to cyclic nucleotide second messenger	9	1.44462	0.0606706	P2RY12, S1PR3, ADRB2, ADCY7, HRH2, AGT, GRM6, DRD4, ADORA1	497	115	13528	2.13021	1	0.588146	66.9114
GOTERM_BP_FAT	GO:0050777~negative regulation of immune response	4	0.642055	0.062007	A2M, INPP5D, IL7R, TGFB1	497	25	13528	4.35509	1	0.594334	67.7334
GOTERM_BP_FAT	GO:0007215~glutamate signaling pathway	4	0.642055	0.062007	GRM5, GRIK3, GRM6, ATP1A3	497	25	13528	4.35509	1	0.594334	67.7334
GOTERM_BP_FAT	GO:0045761~regulation of adenylate cyclase activity	8	1.28411	0.0625265	S1PR3, ADRB2, ADCY7, GRM7, GRM6, DRD4, NTRK2, ADORA1	497	96	13528	2.26828	1	0.59546	68.0478
GOTERM_BP_FAT	GO:0010324~membrane invagination	14	2.24719	0.0632532	RAMP3, LY75, ICAM5, HCK, SYNJ1, STXBP1, GTF2A1L, ADORA1, MARCH3, ADRB2, GRIA1, FCER1G, DNM1, LRP4	497	220	13528	1.73214	1	0.597815	68.4826
GOTERM_BP_FAT	GO:0006897~endocytosis	14	2.24719	0.0632532	RAMP3, LY75, ICAM5, HCK, SYNJ1, STXBP1, GTF2A1L, ADORA1, MARCH3, ADRB2, GRIA1, FCER1G, DNM1, LRP4	497	220	13528	1.73214	1	0.597815	68.4826
GOTERM_BP_FAT	GO:0008366~axon ensheathment	5	0.802568	0.0668713	EGR2, LGI4, PLLP, TGFB1, ACSBG1	497	42	13528	3.24039	1	0.616922	70.5659
GOTERM_BP_FAT	GO:0033189~response to vitamin A	5	0.802568	0.0668713	ALDH1A2, RBP4, CD44, GDAP1, MAP1B	497	42	13528	3.24039	1	0.616922	70.5659
GOTERM_BP_FAT	GO:0007272~ensheathment of neurons	5	0.802568	0.0668713	EGR2, LGI4, PLLP, TGFB1, ACSBG1	497	42	13528	3.24039	1	0.616922	70.5659
GOTERM_BP_FAT	GO:0051591~response to cAMP	5	0.802568	0.0668713	FOS, PTK2B, DUOX2, PTPRN, VGF	497	42	13528	3.24039	1	0.616922	70.5659
GOTERM_BP_FAT	GO:0051050~positive regulation of transport	14	2.24719	0.0672742	RBP4, C3, WFS1, DRD4, TNFSF15, ADORA1, NKX6-1, TGFB1, P2RY12, PCSK1, INHBA, ADRB2, P2RY1, PDZK1	497	223	13528	1.70884	1	0.617205	70.7896
GOTERM_BP_FAT	GO:0032101~regulation of response to external stimulus	11	1.76565	0.0678143	A2M, ADRB2, TNFRSF1B, CCK, PTGS2, C3, AGT, FCER1G, CX3CL1, ADORA1, TGFB1	497	159	13528	1.8831	1	0.618257	71.0871
GOTERM_BP_FAT	GO:0051588~regulation of neurotransmitter transport	4	0.642055	0.0682604	DRD4, NTRK2, STXBP1, CACNA1A	497	26	13528	4.18759	1	0.618773	71.3306
GOTERM_BP_FAT	GO:0009743~response to carbohydrate stimulus	6	0.963082	0.0684021	PCSK1, PTGS2, PTK2B, MAP1B, PTPRN, TGFB1	497	60	13528	2.72193	1	0.617591	71.4075
GOTERM_BP_FAT	GO:0042403~thyroid hormone metabolic process	3	0.481541	0.0694479	DIO2, CACNA1A, CRYM	497	12	13528	6.80483	1	0.621413	71.9694
GOTERM_BP_FAT	GO:0050890~cognition	43	6.90209	0.070104	RBP4, PTGS2, WFS1, TRPV2, RRH, CRHBP, RBP3, NDP, CTNND2, CACNB2, CABP4, RCVRN, NR2E3, CALB1, KCNIP3, ESPN, FOS, SCNN1B, PLCB2, IMPDH1, GUCA1A, C5AR1, EGR2, TRPM8, TMIE, MAP1A, TRPA1, ATP1A3, PDE6H, NTSR2, CNGA1, CACNA2D4, GABRR2, PPEF2, GRIA1, RASGRF1, GRM7, GRM6, PDC, TMOD2, IL12B, CRYM, HTR2A	497	909	13528	1.2876	1	0.623048	72.3166
GOTERM_BP_FAT	GO:0051336~regulation of hydrolase activity	19	3.04976	0.0712109	CCK, C5AR1, RXFP3, TNFSF15, ASAP1, NR4A1, NTSR2, ADAP1, GRM5, P2RY6, SGSM1, RASGRF1, PTK2B, AGT, P2RY1, HTR2B, ARAP2, PLCB2, HTR2A	497	337	13528	1.53462	1	0.627086	72.8931
GOTERM_BP_FAT	GO:0002888~positive regulation of myeloid leukocyte mediated immunity	2	0.321027	0.0719877	C3, FCER1G	497	2	13528	27.2193	1	0.629298	73.291
GOTERM_BP_FAT	GO:0031915~positive regulation of synaptic plasticity	2	0.321027	0.0719877	PTGS2, MAP1B	497	2	13528	27.2193	1	0.629298	73.291
GOTERM_BP_FAT	GO:0045658~regulation of neutrophil differentiation	2	0.321027	0.0719877	IKZF1, INPP5D	497	2	13528	27.2193	1	0.629298	73.291
GOTERM_BP_FAT	GO:0050808~synapse organization	6	0.963082	0.0723789	NRCAM, PCDHB5, MAP1B, NFASC, CACNB2, CACNA1A	497	61	13528	2.67731	1	0.629447	73.4893
GOTERM_BP_FAT	GO:0009636~response to toxin	6	0.963082	0.0723789	DDC, FOS, TRPM6, MAP1B, NR4A2, FAS	497	61	13528	2.67731	1	0.629447	73.4893
GOTERM_BP_FAT	GO:0002703~regulation of leukocyte mediated immunity	6	0.963082	0.0723789	C3, FCER1G, IL12B, IL7R, CD226, TGFB1	497	61	13528	2.67731	1	0.629447	73.4893
GOTERM_BP_FAT	GO:0006968~cellular defense response	6	0.963082	0.0723789	LSP1, CCR9, ITK, C5AR1, CX3CR1, CLEC5A	497	61	13528	2.67731	1	0.629447	73.4893
GOTERM_BP_FAT	GO:0048585~negative regulation of response to stimulus	8	1.28411	0.0743784	A2M, ADRB2, TNFRSF1B, CCK, INPP5D, IL7R, ADORA1, TGFB1	497	100	13528	2.17755	1	0.637953	74.4811
GOTERM_BP_FAT	GO:0022602~ovulation cycle process	6	0.963082	0.0764797	PGR, INHBA, AGT, ANGPT1, BMPR1B, VGF	497	62	13528	2.63413	1	0.646709	75.4856
GOTERM_BP_FAT	GO:0002699~positive regulation of immune effector process	5	0.802568	0.0766893	CD37, C3, FCER1G, IL12B, CD226	497	44	13528	3.0931	1	0.645867	75.5837
GOTERM_BP_FAT	GO:0032012~regulation of ARF protein signal transduction	5	0.802568	0.0766893	ASAP1, PSD2, IQSEC3, ARAP2, ADAP1	497	44	13528	3.0931	1	0.645867	75.5837
GOTERM_BP_FAT	GO:0030817~regulation of cAMP biosynthetic process	8	1.28411	0.0775346	S1PR3, ADRB2, ADCY7, GRM7, GRM6, DRD4, NTRK2, ADORA1	497	101	13528	2.15599	1	0.648182	75.9757
GOTERM_BP_FAT	GO:0032940~secretion by cell	13	2.08668	0.0791272	ANK1, SYN1, STXBP5, SNPH, NTRK2, SYN2, STXBP1, SYTL5, RAPGEF4, DOC2B, VGF, CACNA1A, LCP2	497	207	13528	1.70943	1	0.654095	76.6982
GOTERM_BP_FAT	GO:0001501~skeletal system development	18	2.88925	0.0791559	RBP4, SATB2, AEBP1, PTGS2, DMP1, FRZB, TGFB1, PRELP, INHBA, AMBN, TNFRSF11A, OSR2, COMP, CHST11, STC1, GPNMB, BMPR1B, PHEX	497	319	13528	1.53589	1	0.652374	76.711
GOTERM_BP_FAT	GO:0015671~oxygen transport	3	0.481541	0.080139	HBM, NGB, HBB	497	13	13528	6.28138	1	0.655251	77.1465
GOTERM_BP_FAT	GO:0009165~nucleotide biosynthetic process	12	1.92616	0.0808953	ADCY7, ATP1B2, HAAO, ATP1A3, GUCY1A3, KMO, ATP6V1B2, ATP11C, IMPDH1, PRPS2, TGFB1, ATP6	497	186	13528	1.75608	1	0.657007	77.4763
GOTERM_BP_FAT	GO:0003013~circulatory system process	12	1.92616	0.0808953	ADRB2, PTGS2, F5, OLR1, AGT, CACNA1G, GUCY1A3, BRS3, HCN4, HTR2B, ADORA1, HBB	497	186	13528	1.75608	1	0.657007	77.4763
GOTERM_BP_FAT	GO:0006163~purine nucleotide metabolic process	12	1.92616	0.0808953	ADCY7, ATP1B2, ATP1A3, PDE3B, GUCY1A3, PDE8B, ATP6V1B2, ATP11C, IMPDH1, ENTPD2, TGFB1, ATP6	497	186	13528	1.75608	1	0.657007	77.4763
GOTERM_BP_FAT	GO:0008015~blood circulation	12	1.92616	0.0808953	ADRB2, PTGS2, F5, OLR1, AGT, CACNA1G, GUCY1A3, BRS3, HCN4, HTR2B, ADORA1, HBB	497	186	13528	1.75608	1	0.657007	77.4763
GOTERM_BP_FAT	GO:0031032~actomyosin structure organization	4	0.642055	0.0815796	ACTA1, LMO7, CAPN3, TMOD1	497	28	13528	3.88847	1	0.658403	77.7708
GOTERM_BP_FAT	GO:0003014~renal system process	4	0.642055	0.0815796	WFS1, AGT, FAS, ADORA1	497	28	13528	3.88847	1	0.658403	77.7708
GOTERM_BP_FAT	GO:0009725~response to hormone stimulus	20	3.21027	0.0825009	RBP4, A2M, EGR2, PTGS2, ACTA1, ADCY7, CRYAB, MAP1B, PDE3B, PTPRN, VGF, TGFB1, RERG, PCSK1, ALDH1A2, FOS, PTK2B, TGFBR3, ANGPT1, FAS	497	367	13528	1.48334	1	0.660883	78.1615
GOTERM_BP_FAT	GO:0030814~regulation of cAMP metabolic process	8	1.28411	0.0840781	S1PR3, ADRB2, ADCY7, GRM7, GRM6, DRD4, NTRK2, ADORA1	497	103	13528	2.11412	1	0.666324	78.8154
GOTERM_BP_FAT	GO:0050954~sensory perception of mechanical stimulus	8	1.28411	0.0840781	WFS1, GRM7, MAP1A, TMIE, NDP, TRPA1, CRYM, ESPN	497	103	13528	2.11412	1	0.666324	78.8154
GOTERM_BP_FAT	GO:0031668~cellular response to extracellular stimulus	6	0.963082	0.0850489	FOS, LDHA, SFRP2, ALB, NR4A2, HRK	497	64	13528	2.55181	1	0.66892	79.2087
GOTERM_BP_FAT	GO:0008585~female gonad development	6	0.963082	0.0850489	PGR, INHBA, AGT, ANGPT1, BMPR1B, VGF	497	64	13528	2.55181	1	0.66892	79.2087
GOTERM_BP_FAT	GO:0007186~G-protein coupled receptor protein signaling pathway	51	8.1862	0.0862759	GNA14, ADCY7, GPR160, GRIK3, RRH, ADORA1, S1PR3, CXCR6, RAPGEF4, NPSR1, RAMP3, PTGER2, C5AR1, GPR176, CD3E, RXFP3, PROKR1, PDYN, NTSR2, CCR9, GRM5, GABRR2, ADRB2, LPAR5, GRM7, CX3CR1, GRM6, PTAFR, CCK, C3, DRD4, NMB, APLNR, P2RY6, DGKB, HRH2, AGT, P2RY1, ENTPD2, GABRA2, GPR158, BRS3, P2RY12, P2RY13, GPR37, PDC, ADRA1A, AREG, HTR2B, CACNA1A, HTR2A	497	1123	13528	1.23614	1	0.672612	79.696
GOTERM_BP_FAT	GO:0001816~cytokine production	5	0.802568	0.0871867	S1PR3, IL12B, CD226, PTAFR, LCP2	497	46	13528	2.95862	1	0.674851	80.0506
GOTERM_BP_FAT	GO:0002791~regulation of peptide secretion	5	0.802568	0.0871867	RBP4, PDE3B, PDE8B, ADORA1, NKX6-1	497	46	13528	2.95862	1	0.674851	80.0506
GOTERM_BP_FAT	GO:0007517~muscle organ development	13	2.08668	0.0879672	RBP4, AEBP1, ACTA1, CRYAB, MYH3, MRAS, MET, MYLPF, CHODL, CACNB2, CAPN3, TGFBR3, SGCA	497	211	13528	1.67702	1	0.676491	80.3499
GOTERM_BP_FAT	GO:0007243~protein kinase cascade	20	3.21027	0.0881595	RET, TLR10, C5AR1, CRYAB, MET, DRD4, TNFSF15, MLXIPL, WNK2, PDE6H, ADORA1, P2RY12, MAST1, STAT4, PTK2B, NPHS1, ADRA1A, TGFBR3, FGF1, SLC9A1	497	370	13528	1.47131	1	0.675566	80.423
GOTERM_BP_FAT	GO:0006958~complement activation, classical pathway	4	0.642055	0.088627	CR2, C4A, C3, MASP2	497	29	13528	3.75439	1	0.675838	80.5996
GOTERM_BP_FAT	GO:0007292~female gamete generation	6	0.963082	0.0895152	PGR, PTGS2, PTK2B, ZMIZ1, AGT, BMPR1B	497	65	13528	2.51255	1	0.677911	80.931
GOTERM_BP_FAT	GO:0030279~negative regulation of ossification	3	0.481541	0.0912978	ADRB2, PTK2B, TGFB1	497	14	13528	5.83271	1	0.683718	81.5801
GOTERM_BP_FAT	GO:0007263~nitric oxide mediated signal transduction	3	0.481541	0.0912978	AGT, GUCY1A3, DDAH1	497	14	13528	5.83271	1	0.683718	81.5801
GOTERM_BP_FAT	GO:0030728~ovulation	3	0.481541	0.0912978	PGR, PTGS2, AGT	497	14	13528	5.83271	1	0.683718	81.5801
GOTERM_BP_FAT	GO:0007188~G-protein signaling, coupled to cAMP nucleotide second messenger	7	1.1236	0.0916275	P2RY12, S1PR3, ADRB2, ADCY7, GRM6, DRD4, ADORA1	497	85	13528	2.24159	1	0.683375	81.6978
GOTERM_BP_FAT	GO:0003001~generation of a signal involved in cell-cell signaling	7	1.1236	0.0916275	SYN1, SNPH, SYN2, NTRK2, RAPGEF4, VGF, CACNA1A	497	85	13528	2.24159	1	0.683375	81.6978
GOTERM_BP_FAT	GO:0048638~regulation of developmental growth	5	0.802568	0.0926827	NRCAM, RBP4, ADRB2, MAP1B, NTN1	497	47	13528	2.89567	1	0.686037	82.0699
GOTERM_BP_FAT	GO:0009746~response to hexose stimulus	5	0.802568	0.0926827	PCSK1, PTGS2, PTK2B, PTPRN, TGFB1	497	47	13528	2.89567	1	0.686037	82.0699
GOTERM_BP_FAT	GO:0034284~response to monosaccharide stimulus	5	0.802568	0.0926827	PCSK1, PTGS2, PTK2B, PTPRN, TGFB1	497	47	13528	2.89567	1	0.686037	82.0699
GOTERM_BP_FAT	GO:0046883~regulation of hormone secretion	6	0.963082	0.0941007	INHBA, RBP4, PDE3B, PDE8B, ADORA1, NKX6-1	497	66	13528	2.47448	1	0.690132	82.5587
GOTERM_BP_FAT	GO:0002696~positive regulation of leukocyte activation	8	1.28411	0.0944679	IKZF1, CD3E, IL12B, INPP5D, IL7R, CD226, PDCD1LG2, TGFB1	497	106	13528	2.05429	1	0.689926	82.6831
GOTERM_BP_FAT	GO:0048584~positive regulation of response to stimulus	14	2.24719	0.0949405	CR2, C4A, THEMIS, CD3E, MASP2, C3, SLA2, CX3CL1, SKAP1, TGFB1, AGT, FCER1G, IL12B, CD226	497	236	13528	1.61471	1	0.690146	82.8421
GOTERM_BP_FAT	GO:0030534~adult behavior	7	1.1236	0.0956312	GRM7, MET, DRD4, NR4A2, ATP1A3, BRS3, CACNA1A	497	86	13528	2.21553	1	0.691237	83.0721
GOTERM_BP_FAT	GO:0048545~response to steroid hormone stimulus	12	1.92616	0.0958321	FOS, ALDH1A2, PCSK1, A2M, PTGS2, ACTA1, CRYAB, MAP1B, ANGPT1, FAS, PTPRN, TGFB1	497	192	13528	1.70121	1	0.69037	83.1384
GOTERM_BP_FAT	GO:0050729~positive regulation of inflammatory response	4	0.642055	0.0959199	C3, AGT, FCER1G, CX3CL1	497	30	13528	3.62924	1	0.689057	83.1673
GOTERM_BP_FAT	GO:0034654~nucleobase, nucleoside, nucleotide and nucleic acid biosynthetic process	12	1.92616	0.0984724	ADCY7, ATP1B2, HAAO, ATP1A3, GUCY1A3, KMO, ATP6V1B2, ATP11C, IMPDH1, PRPS2, TGFB1, ATP6	497	193	13528	1.69239	1	0.69743	83.9876
GOTERM_BP_FAT	GO:0034404~nucleobase, nucleoside and nucleotide biosynthetic process	12	1.92616	0.0984724	ADCY7, ATP1B2, HAAO, ATP1A3, GUCY1A3, KMO, ATP6V1B2, ATP11C, IMPDH1, PRPS2, TGFB1, ATP6	497	193	13528	1.69239	1	0.69743	83.9876
GOTERM_BP_FAT	GO:0001505~regulation of neurotransmitter levels	6	0.963082	0.0988041	SLC17A7, GABRA2, SYN1, SNPH, SYN2, CACNA1A	497	67	13528	2.43755	1	0.697071	84.0914
GOTERM_BP_FAT	GO:0042698~ovulation cycle	6	0.963082	0.0988041	PGR, INHBA, AGT, ANGPT1, BMPR1B, VGF	497	67	13528	2.43755	1	0.697071	84.0914

## Sheet: Y180-Y30_down
Category	Term	Count	%	PValue	Genes	List Total	Pop Hits	Pop Total	Fold Enrichment	Bonferroni	Benjamini	FDR
GOTERM_BP_FAT	GO:0006811~ion transport	63	7.19178	3.81935e-06	SLC5A5, ATP1B1, SLC13A5, CPT2, GRIK1, SLC20A2, AQP1, HVCN1, KCNJ13, KCNQ4, ATP2B3, SLC24A4, SLC23A2, TRPV4, SLCO1C1, SLC4A2, ANO4, JPH1, OCA2, SLC4A5, TRPM4, SGK1, SLC24A5, CNGA3, CDK2, CLIC6, SLC30A10, KCNH3, STEAP1, MPST, FXYD1, KCNMB4, SLC39A13, SLC39A12, HFE, CACNB3, SLC38A11, KCNA5, BEST2, SLC11A2, ANXA6, SLC30A1, PKD2, SCN9A, KCNE2, SLCO3A1, SLC31A1, SCNN1A, SLC39A2, CNNM2, CPT1B, NOX5, SLC…	605	768	13528	1.83425	0.00960888	0.00960888	0.00674605
GOTERM_BP_FAT	GO:0006812~cation transport	49	5.59361	7.72877e-06	SLC5A5, ATP1B1, SLC13A5, CPT2, SLC20A2, AQP1, HVCN1, KCNJ13, KCNQ4, ATP2B3, SLC24A4, SLC23A2, TRPV4, JPH1, SLC4A5, TRPM4, SGK1, SLC24A5, CDK2, SLC30A10, KCNH3, STEAP1, KCNMB4, SLC39A13, SLC39A12, HFE, SLC38A11, CACNB3, KCNA5, ANXA6, SLC11A2, SLC30A1, SCN9A, PKD2, KCNE2, SCNN1A, SLC31A1, SLC39A2, CPT1B, SLC12A2, SLC12A4, TRPC7, ATP13A5, ATP13A4, ATP7A, SLC4A10, SLC5A6, SLC13A4, CHRNA10	605	553	13528	1.9813	0.0193488	0.00972164	0.0136507
GOTERM_BP_FAT	GO:0007018~microtubule-based movement	18	2.05479	1.03196e-05	KIF14, DNAH11, KIFC1, KIF22, KIF11, KIF24, KIF27, KIF15, DNAH3, DNAH1, DNAH2, BICD2, DNAH5, KIF1C, KIF2C, KIF19, DYNLRB2, KIF20A	605	113	13528	3.56182	0.0257508	0.00865836	0.0182264
GOTERM_BP_FAT	GO:0030001~metal ion transport	43	4.90868	1.10201e-05	KCNMB4, ATP1B1, SLC5A5, SLC13A5, SLC20A2, SLC39A13, SLC39A12, HFE, SLC38A11, CACNB3, KCNA5, KCNJ13, ANXA6, SLC11A2, KCNQ4, ATP2B3, SLC24A4, SLC30A1, SLC23A2, PKD2, SCN9A, TRPV4, KCNE2, SCNN1A, JPH1, SLC31A1, SLC39A2, SLC4A5, TRPM4, SGK1, SLC12A2, SLC12A4, TRPC7, SLC24A5, CDK2, ATP7A, SLC4A10, SLC5A6, SLC13A4, SLC30A10, KCNH3, STEAP1, CHRNA10	605	465	13528	2.06773	0.0274746	0.00694058	0.0194635
GOTERM_BP_FAT	GO:0001539~ciliary or flagellar motility	7	0.799087	1.70665e-05	DNAH11, RSPH4A, DNAH3, TEKT2, DNAH1, DNAH2, DNAH5	605	14	13528	11.1802	0.0422271	0.00859179	0.030141
GOTERM_BP_FAT	GO:0051180~vitamin transport	8	0.913242	6.07954e-05	CPT1B, CPT2, CUBN, FOLR2, SLC23A2, FOLR1, SLC5A6, SLC19A1	605	24	13528	7.45344	0.142467	0.0252906	0.107331
GOTERM_BP_FAT	GO:0006814~sodium ion transport	17	1.94064	0.00021918	SLC5A5, ATP1B1, SGK1, SLC13A5, SLC12A2, SLC20A2, SLC12A4, SLC24A5, SLC38A11, SLC4A10, SLC24A4, SLC23A2, SCN9A, SLC5A6, SLC13A4, SCNN1A, SLC4A5	605	130	13528	2.92404	0.425439	0.0761117	0.386441
GOTERM_BP_FAT	GO:0055114~oxidation reduction	49	5.59361	0.00027924	ACOX2, HCCS, TMX1, CYB5R1, ENOX2, ADHFE1, LDHD, PRDX4, AASS, PAH, PDIA5, UQCRQ, ALDH3A2, PECR, TYR, CYP39A1, P4HA2, FMO1, P4HA3, IDH2, ETFDH, PIWIL2, TPO, CAT, LOXL1, BDH1, CHDH, MDH1B, NOS1, TBXAS1, AIFM3, NOX5, COX4I2, CDO1, DHRS7C, POR, NDUFA11, CYP4B1, ADI1, ACADVL, CYBA, VAT1L, RDH10, CYP27A1, DIO3, RRM2, BLVRB, STEAP1, RDH13	605	639	13528	1.71464	0.506394	0.08447	0.492087
GOTERM_BP_FAT	GO:0000280~nuclear division	23	2.62557	0.000346146	KIFC1, KIF22, KIF11, DLGAP5, CCNF, KIF15, CENPF, PKMYT1, NDC80, CDC20, PBK, UBE2C, CDK2, CDK3, CCNB1, KIF2C, NCAPH, CDCA8, CCNB2, BUB1B, CCNA1, ASPM, CDCA3	605	220	13528	2.33767	0.583225	0.0926667	0.609651
GOTERM_BP_FAT	GO:0007067~mitosis	23	2.62557	0.000346146	KIFC1, KIF22, KIF11, DLGAP5, CCNF, KIF15, CENPF, PKMYT1, NDC80, CDC20, PBK, UBE2C, CDK2, CDK3, CCNB1, KIF2C, NCAPH, CDCA8, CCNB2, BUB1B, CCNA1, ASPM, CDCA3	605	220	13528	2.33767	0.583225	0.0926667	0.609651
GOTERM_BP_FAT	GO:0000087~M phase of mitotic cell cycle	23	2.62557	0.000444443	KIFC1, KIF22, KIF11, DLGAP5, CCNF, KIF15, CENPF, PKMYT1, NDC80, CDC20, PBK, UBE2C, CDK2, CDK3, CCNB1, KIF2C, NCAPH, CDCA8, CCNB2, BUB1B, CCNA1, ASPM, CDCA3	605	224	13528	2.29593	0.674958	0.106295	0.782136
GOTERM_BP_FAT	GO:0048285~organelle fission	23	2.62557	0.000600908	KIFC1, KIF22, KIF11, DLGAP5, CCNF, KIF15, CENPF, PKMYT1, NDC80, CDC20, PBK, UBE2C, CDK2, CDK3, CCNB1, KIF2C, NCAPH, CDCA8, CCNB2, BUB1B, CCNA1, ASPM, CDCA3	605	229	13528	2.2458	0.78119	0.129024	1.05611
GOTERM_BP_FAT	GO:0007017~microtubule-based process	24	2.73973	0.000977995	KIF14, DNAH11, KIFC1, KIF22, KIF11, KIF24, KIF27, CROCC, KIF15, DNAH3, DNAH1, NDC80, DNAH2, UBE2C, BICD2, DNAH5, KIF1C, KIF2C, TEKT1, BUB1B, TEKT2, KIF19, DYNLRB2, KIF20A	605	253	13528	2.12114	0.915717	0.186274	1.71346
GOTERM_BP_FAT	GO:0000041~transition metal ion transport	11	1.25571	0.00115377	SLC11A2, ATP7A, SLC30A1, SLC39A13, SLC39A12, TRPC7, HFE, SLC30A10, SLC31A1, STEAP1, SLC39A2	605	71	13528	3.46428	0.945981	0.201079	2.01847
GOTERM_BP_FAT	GO:0051181~cofactor transport	6	0.684932	0.00154679	CPT1B, CPT2, FOLR2, FOLR1, SLC5A6, SLC19A1	605	20	13528	6.7081	0.980026	0.243855	2.69722
GOTERM_BP_FAT	GO:0046942~carboxylic acid transport	16	1.82648	0.00238367	CPT1B, SLC13A5, CPT2, AQP9, SLC38A11, SLC7A4, SLC19A1, SLC16A5, FOLR2, SLC16A6, FOLR1, SLC23A2, SLC5A6, CTNS, OCA2, CROT	605	147	13528	2.43378	0.997602	0.331158	4.12777
GOTERM_BP_FAT	GO:0015849~organic acid transport	16	1.82648	0.0025465	CPT1B, SLC13A5, CPT2, AQP9, SLC38A11, SLC7A4, SLC19A1, SLC16A5, FOLR2, SLC16A6, FOLR1, SLC23A2, SLC5A6, CTNS, OCA2, CROT	605	148	13528	2.41733	0.998413	0.331594	4.4038
GOTERM_BP_FAT	GO:0008610~lipid biosynthetic process	27	3.08219	0.00272033	CYB5R1, SGMS2, PMVK, PECR, ISYNA1, CYP39A1, B3GNT5, PIWIL2, ELOVL7, PRKAA2, AGPAT4, AGPAT2, PGAP3, PGAP2, ACAA2, LPL, CPT1B, PLP1, CRLS1, TBXAS1, PIGW, CDS1, PRLR, ST8SIA5, MBOAT2, SMPD2, PC	605	323	13528	1.86913	0.998978	0.333077	4.69766
GOTERM_BP_FAT	GO:0022403~cell cycle phase	32	3.65297	0.00343361	E2F1, BCAT1, KIF22, KIFC1, PKMYT1, KIF2C, CDCA8, NCAPH, RSPH1, MTBP, PIWIL2, CCNA1, ASPM, CDCA3, EXO1, KIF11, DLGAP5, KIF15, CCNF, POLE, CENPF, CDC20, NDC80, PBK, UBE2C, CDK2, CDK3, CCNB1, CCNB3, CDKN1A, CCNB2, BUB1B	605	414	13528	1.72833	0.999833	0.383108	5.89448
GOTERM_BP_FAT	GO:0000279~M phase	27	3.08219	0.00348579	KIFC1, KIF22, PKMYT1, KIF2C, CDCA8, NCAPH, RSPH1, PIWIL2, CCNA1, ASPM, CDCA3, EXO1, KIF11, DLGAP5, KIF15, CCNF, CENPF, NDC80, CDC20, PBK, UBE2C, CDK2, CDK3, CCNB1, CCNB3, CCNB2, BUB1B	605	329	13528	1.83504	0.999853	0.371616	5.98149
GOTERM_BP_FAT	GO:0016054~organic acid catabolic process	13	1.48402	0.00392925	BCAT1, ACOX2, CPT1B, CPT2, NOS1, AASS, PAH, CDO1, ACADVL, CYP39A1, ETFDH, DDAH2, GAD1	605	111	13528	2.61878	0.999952	0.392033	6.71777
GOTERM_BP_FAT	GO:0046395~carboxylic acid catabolic process	13	1.48402	0.00392925	BCAT1, ACOX2, CPT1B, CPT2, NOS1, AASS, PAH, CDO1, ACADVL, CYP39A1, ETFDH, DDAH2, GAD1	605	111	13528	2.61878	0.999952	0.392033	6.71777
GOTERM_BP_FAT	GO:0046394~carboxylic acid biosynthetic process	16	1.82648	0.00396289	BCAT1, LPL, PLP1, TBXAS1, NAGS, ASS1, PAH, CDO1, ADI1, PECR, CTH, CYP39A1, PIWIL2, ELOVL7, PRKAA2, AGPAT2	605	155	13528	2.30816	0.999956	0.379981	6.7734
GOTERM_BP_FAT	GO:0016053~organic acid biosynthetic process	16	1.82648	0.00396289	BCAT1, LPL, PLP1, TBXAS1, NAGS, ASS1, PAH, CDO1, ADI1, PECR, CTH, CYP39A1, PIWIL2, ELOVL7, PRKAA2, AGPAT2	605	155	13528	2.30816	0.999956	0.379981	6.7734
GOTERM_BP_FAT	GO:0022402~cell cycle process	40	4.56621	0.00458245	GAS2L3, BCAT1, E2F1, KIF22, KIFC1, RPRM, PKMYT1, TGFB2, KIF2C, CDCA8, NCAPH, RSPH1, PKD2, MTBP, PIWIL2, CCNA1, ASPM, CDCA3, EXO1, KIF11, AK1, DLGAP5, POLE, KIF15, CCNF, CENPF, CDC20, NDC80, GAS1, PBK, UBE2C, TP73, CDK2, CDK3, CCNB1, CCNB3, CDKN1A, CCNB2, GAS2L2, BUB1B	605	565	13528	1.58303	0.999991	0.410084	7.79239
GOTERM_BP_FAT	GO:0055085~transmembrane transport	40	4.56621	0.00513429	SLC2A12, SLC2A13, SLC5A5, SLC45A4, CPT2, SLC13A5, AQP9, SLC39A13, SLC39A12, KCNA5, SLC19A1, AQP1, SLC11A2, KCNQ4, FOLR2, SLC24A4, FOLR1, SLC23A2, SLC30A1, SCN9A, TRPV4, OCA2, SLC39A2, TRPM4, CPT1B, CUBN, SLC12A2, SLC12A4, TRPC7, SLC24A5, CNGA3, ATP7A, SLC16A5, SLC25A34, SLC16A6, SLC37A2, SLC5A6, SLC13A4, SLC30A10, KCNH3	605	569	13528	1.5719	0.999998	0.432082	8.69115
GOTERM_BP_FAT	GO:0001558~regulation of cell growth	18	2.05479	0.00617419	NRP1, FGFRL1, SPHK1, BARHL2, OSGIN1, CISH, TP73, TGFB2, NOV, AGTR1, PRKCQ, CTH, CDKN1A, HNF4A, TRO, TNK1, IGFBP2, NET1	605	194	13528	2.07467	1	0.479187	10.3624
GOTERM_BP_FAT	GO:0051301~cell division	24	2.73973	0.00681633	KIFC1, NOX5, KIF11, CCNF, AURKC, CENPF, NDC80, CDC20, UBE2C, CDK2, LLGL2, TGFB2, CDK3, CCNB1, NCAPH, CCNB3, CDCA8, CCNB2, BUB1B, CDCA7L, CCNA1, ASPM, CABLES1, CDCA3	605	295	13528	1.81915	1	0.49924	11.3799
GOTERM_BP_FAT	GO:0006091~generation of precursor metabolites and energy	25	2.85388	0.00706459	TMX1, MDH1B, AIFM3, ENOX2, FECH, NOX5, COX7A1, HKDC1, LEPR, COX4I2, PFKP, BPGM, ISL1, UQCRQ, NDUFA11, ACADVL, CYBA, PPP1R3B, IDH2, ETFDH, ENO4, CAT, STEAP1, CROT, XYLB	605	313	13528	1.78597	1	0.498089	11.7704
GOTERM_BP_FAT	GO:0007346~regulation of mitotic cell cycle	15	1.71233	0.0081034	DLGAP5, SPHK1, RPRM, CENPF, PKMYT1, RPS27L, AFAP1L2, GAS1, UBE2C, CDK2, PRKCQ, HNF4A, MTBP, BUB1B, EGF	605	152	13528	2.20661	1	0.533179	13.3867
GOTERM_BP_FAT	GO:0007411~axon guidance	12	1.36986	0.00819491	DCC, EPHA4, NRP1, CXCR4, TNR, ERBB2, DPYSL5, GAS1, ISL1, BMP7, SPON2, GAP43	605	107	13528	2.5077	1	0.524283	13.5277
GOTERM_BP_FAT	GO:0000278~mitotic cell cycle	28	3.19635	0.00846197	E2F1, BCAT1, KIFC1, KIF22, PKMYT1, KIF2C, CDCA8, NCAPH, MTBP, CCNA1, ASPM, CDCA3, KIF11, DLGAP5, KIF15, CCNF, POLE, CENPF, CDC20, NDC80, PBK, UBE2C, CDK2, CDK3, CCNB1, CDKN1A, CCNB2, BUB1B	605	370	13528	1.69213	1	0.523262	13.9381
GOTERM_BP_FAT	GO:0015672~monovalent inorganic cation transport	25	2.85388	0.00847545	KCNMB4, ATP1B1, SLC5A5, SLC13A5, SLC20A2, SLC38A11, KCNA5, HVCN1, KCNJ13, KCNQ4, SLC24A4, SLC23A2, SCN9A, KCNE2, SCNN1A, SLC4A5, SGK1, SLC12A2, SLC12A4, SLC24A5, CDK2, SLC4A10, SLC5A6, SLC13A4, KCNH3	605	318	13528	1.75789	1	0.511903	13.9587
GOTERM_BP_FAT	GO:0006820~anion transport	14	1.59817	0.0116464	FXYD1, SLC5A5, SLC13A5, SLC12A2, SLC20A2, SLC12A4, SLC4A10, SLC16A5, CLIC6, SLC4A2, SLC13A4, OCA2, MPST, SLC4A5	605	143	13528	2.18912	1	0.615311	18.6917
GOTERM_BP_FAT	GO:0007049~cell cycle	49	5.59361	0.0132767	GAS2L3, BCAT1, E2F1, KIFC1, KIF22, CROCC, E2F7, AURKC, RPRM, PKMYT1, LLGL2, TGFB2, KIF2C, CDCA8, NCAPH, RSPH1, PKD2, MTBP, PIWIL2, CCNA1, ASPM, CABLES1, CDCA3, EXO1, KIF11, AK1, DLGAP5, KIF15, CCNF, POLE, CENPF, CDC20, NDC80, PBK, GAS1, UBE2C, CDK2, ESCO2, TP73, CDK3, CCNB1, CCNB3, CDKN1A, UHRF1, CCNB2, KRT18, MAPK4, GAS2L2, BUB1B	605	776	13528	1.41193	1	0.652115	21.0284
GOTERM_BP_FAT	GO:0030030~cell projection organization	27	3.08219	0.0141753	DCC, NRTN, NRP1, CROCC, ERBB2, DYNC2LI1, B9D2, CXCR4, TNR, TEKT2, SPON2, IL6, BAIAP2L1, FOXJ1, DPYSL5, GAS1, DNAI2, ISL1, ATP7A, SMO, EPHA4, SPAG6, ITGA8, CAPG, TSGA10, BMP7, GAP43	605	368	13528	1.64057	1	0.665019	22.2891
GOTERM_BP_FAT	GO:0008654~phospholipid biosynthetic process	11	1.25571	0.0156053	PGAP3, PGAP2, CPT1B, ISYNA1, CRLS1, SGMS2, PIGW, MBOAT2, CDS1, AGPAT4, AGPAT2	605	102	13528	2.41141	1	0.689463	24.2564
GOTERM_BP_FAT	GO:0006525~arginine metabolic process	4	0.456621	0.0181154	NOS1, ASS1, NAGS, DDAH2	605	13	13528	6.8801	1	0.732984	27.5963
GOTERM_BP_FAT	GO:0040008~regulation of growth	25	2.85388	0.0187347	TMX1, NRP1, ENOX2, SPHK1, NELL2, BARHL2, FGFRL1, OSGIN1, CISH, TP73, GAS6, TGFB2, ACVR1C, NOV, PRKCQ, AGTR1, CTH, CDKN1A, HNF4A, DIO3, TRO, TNK1, IGFBP2, GAP43, NET1	605	341	13528	1.63932	1	0.735012	28.3987
GOTERM_BP_FAT	GO:0044271~nitrogen compound biosynthetic process	24	2.73973	0.0199076	BCAT1, ATP1B1, FECH, NOS1, NAGS, ASS1, ADCY6, PAH, AK5, CDO1, ATP13A5, CMPK2, ATP13A4, TGFB2, ATP7A, ADI1, ATP2B3, NME2, CTH, ADCY9, RRM2, DDAH2, NT5E, ATP8B4	605	325	13528	1.65122	1	0.746881	29.8955
GOTERM_BP_FAT	GO:0065004~protein-DNA complex assembly	10	1.14155	0.0201351	HIST1H2BB, HIST4H4, HIST1H1D, HIST1H2BN, HIST1H4A, HIST1H2BF, HIST1H2BJ, CENPF, HIST1H2AJ, HIST1H3E, HIST3H3, HIST2H4A	605	91	13528	2.45718	1	0.741583	30.1823
GOTERM_BP_FAT	GO:0006829~zinc ion transport	5	0.570776	0.0205241	SLC30A1, SLC39A13, SLC39A12, SLC30A10, SLC39A2	605	24	13528	4.6584	1	0.739259	30.6703
GOTERM_BP_FAT	GO:0006928~cell motion	32	3.65297	0.0221354	DCC, DNAH11, NRTN, NRP1, ENPP2, ERBB2, DNAH3, DNAH1, DNAH2, DNAH5, TGFB2, DNALI1, CXCR4, PEX2, RSPH4A, TNR, SEMA3C, TEKT2, SPON2, IL6, FOXJ1, BARHL2, DPYSL5, DCDC2, GAS1, ISL1, SMO, EPHA4, LYVE1, ID1, BMP7, GAP43	605	475	13528	1.50638	1	0.756994	32.6574
GOTERM_BP_FAT	GO:0015718~monocarboxylic acid transport	7	0.799087	0.0231708	CPT1B, SLC16A5, CPT2, AQP9, SLC16A6, SLC5A6, CROT	605	50	13528	3.13045	1	0.764369	33.9059
GOTERM_BP_FAT	GO:0043392~negative regulation of DNA binding	7	0.799087	0.0253044	PTHLH, SMO, HNF4A, ID1, FOXJ1, CAT, SIGIRR	605	51	13528	3.06906	1	0.786194	36.4099
GOTERM_BP_FAT	GO:0008652~cellular amino acid biosynthetic process	7	0.799087	0.0253044	BCAT1, ADI1, CTH, ASS1, NAGS, PAH, CDO1	605	51	13528	3.06906	1	0.786194	36.4099
GOTERM_BP_FAT	GO:0048066~pigmentation during development	5	0.570776	0.0269273	DCT, TYR, MITF, OCA2, RAB27A	605	26	13528	4.30006	1	0.799066	38.2544
GOTERM_BP_FAT	GO:0019725~cellular homeostasis	31	3.53881	0.0286596	PRX, FXYD1, TMX1, KCNMB4, GRIK1, ERBB2, TRHR, PRDX4, HFE, PDIA5, LPAR2, KCNA5, BEST2, AGTR1, CXCR4, SLC30A1, PKD2, TRPV4, OLIG2, JPH1, PLP1, AIFM3, SLC12A2, SLC12A4, NXNL1, FZD2, SLC9A3R1, ATP7A, CXCL13, CLDN1, IFI6	605	466	13528	1.48749	1	0.811881	40.1675
GOTERM_BP_FAT	GO:0007167~enzyme linked receptor protein signaling pathway	24	2.73973	0.0332648	FGFR2, WFIKKN2, NRTN, IRS2, NRP1, PTPRE, LTBP2, PTPRF, ERBB2, FOXO1, EPHA1, EPHA2, TGFB2, EPHA5, MSX2, EPHA4, MSX1, PRLR, DOK4, ID1, GDF15, BMP7, EGF, GRB7	605	342	13528	1.56915	1	0.850511	44.985
GOTERM_BP_FAT	GO:0006334~nucleosome assembly	9	1.0274	0.0336125	HIST1H2BB, HIST4H4, HIST1H1D, HIST1H2BN, HIST1H4A, HIST1H2BF, HIST1H2BJ, HIST1H2AJ, HIST1H3E, HIST3H3, HIST2H4A	605	84	13528	2.39575	1	0.847255	45.3334
GOTERM_BP_FAT	GO:0048878~chemical homeostasis	33	3.76712	0.0339391	PRX, FXYD1, KCNMB4, AQP9, GRIK1, ERBB2, TRHR, HFE, LPAR2, KCNA5, SLC11A2, BEST2, AGTR1, CXCR4, SLC30A1, PKD2, TRPV4, OLIG2, JPH1, LPL, IRS2, PLP1, AIFM3, FZD2, SLC9A3R1, LDLRAP1, PTHLH, ATP7A, SLC4A10, HNF4A, CXCL13, CLDN1, IFI6	605	512	13528	1.44119	1	0.843889	45.6589
GOTERM_BP_FAT	GO:0006635~fatty acid beta-oxidation	5	0.570776	0.0343988	ACOX2, ACADVL, CPT1B, CPT2, ETFDH	605	28	13528	3.99292	1	0.841748	46.1138
GOTERM_BP_FAT	GO:0046320~regulation of fatty acid oxidation	5	0.570776	0.0343988	CPT1B, IRS2, CPT2, CAB39L, PRKAA2	605	28	13528	3.99292	1	0.841748	46.1138
GOTERM_BP_FAT	GO:0042981~regulation of apoptosis	48	5.47945	0.0353793	DCC, TMX1, ADAMTSL4, ERBB2, MGMT, MITF, FOXO1, CD70, RPS27L, PAWR, TGFB2, ACVR1C, DPF1, MSX2, SLC11A2, PECR, TMEM102, CAT, DDAH2, ALX4, PHLDA3, TOP2A, NET1, RAB27A, PGAP2, IL6, AIFM3, NOX5, PTPRF, SPHK1, PDE3A, GAS1, F7, ANXA4, TP73, PPIF, ATP7A, SMO, NME2, CDKN1A, MSX1, KRT18, NUPR1, PRLR, SFRP1, BMP7, IFI6, SMPD2	605	804	13528	1.33495	1	0.844071	47.0722
GOTERM_BP_FAT	GO:0016055~Wnt receptor signaling pathway	12	1.36986	0.0357467	FZD9, SFRP5, FZD8, RSPO1, SFRP1, CCDC88C, SOSTDC1, MITF, FRAT2, FZD2, SLC9A3R1, FZD7	605	133	13528	2.01747	1	0.841254	47.4271
GOTERM_BP_FAT	GO:0015884~folic acid transport	3	0.342466	0.0359945	FOLR2, FOLR1, SLC19A1	605	7	13528	9.583	1	0.837504	47.6652
GOTERM_BP_FAT	GO:0006323~DNA packaging	11	1.25571	0.0363638	HIST1H2BB, HIST4H4, HIST1H1D, HIST1H2BF, HIST2H4A, NCAPH, HIST1H2BN, HIST1H4A, HIST1H2BJ, HIST1H3E, HIST1H2AJ, HIST3H3, TOP2A	605	117	13528	2.10225	1	0.83483	48.0182
GOTERM_BP_FAT	GO:0009205~purine ribonucleoside triphosphate metabolic process	11	1.25571	0.0363638	ATP7A, ATP1B1, ATP2B3, NME2, AK1, AK5, MYH7, CTNS, ATP13A5, ATP8B4, ATP13A4	605	117	13528	2.10225	1	0.83483	48.0182
GOTERM_BP_FAT	GO:0016125~sterol metabolic process	10	1.14155	0.036445	ACAA2, CYB5R1, CYP39A1, CUBN, CYP27A1, LEPR, CAT, PRKAA2, PMVK, LDLRAP1	605	101	13528	2.21389	1	0.829807	48.0955
GOTERM_BP_FAT	GO:0009132~nucleoside diphosphate metabolic process	4	0.456621	0.03775	NME2, RRM2, NUDT7, AK5	605	17	13528	5.26125	1	0.834946	49.3233
GOTERM_BP_FAT	GO:0009612~response to mechanical stimulus	7	0.799087	0.0379245	SLC12A2, PKD2, TRPV4, DNAH1, IGFBP2, CHRNA10, SMPD2	605	56	13528	2.79504	1	0.830866	49.4854
GOTERM_BP_FAT	GO:0009199~ribonucleoside triphosphate metabolic process	11	1.25571	0.0382157	ATP7A, ATP1B1, ATP2B3, NME2, AK1, AK5, MYH7, CTNS, ATP13A5, ATP8B4, ATP13A4	605	118	13528	2.08444	1	0.827782	49.7548
GOTERM_BP_FAT	GO:0006163~purine nucleotide metabolic process	15	1.71233	0.0392345	ATP1B1, AK1, ADCY6, AK5, MYH7, ATP13A5, ATP13A4, PTHLH, ATP7A, ATP2B3, NME2, ADCY9, CTNS, NT5E, ATP8B4	605	186	13528	1.80325	1	0.830541	50.6867
GOTERM_BP_FAT	GO:0043067~regulation of programmed cell death	48	5.47945	0.0396722	DCC, TMX1, ADAMTSL4, ERBB2, MGMT, MITF, FOXO1, CD70, RPS27L, PAWR, TGFB2, ACVR1C, DPF1, MSX2, SLC11A2, PECR, TMEM102, CAT, DDAH2, ALX4, PHLDA3, TOP2A, NET1, RAB27A, PGAP2, IL6, AIFM3, NOX5, PTPRF, SPHK1, PDE3A, GAS1, F7, ANXA4, TP73, PPIF, ATP7A, SMO, NME2, CDKN1A, MSX1, KRT18, NUPR1, PRLR, SFRP1, BMP7, IFI6, SMPD2	605	812	13528	1.32179	1	0.82871	51.082
GOTERM_BP_FAT	GO:0031497~chromatin assembly	9	1.0274	0.0401889	HIST1H2BB, HIST4H4, HIST1H1D, HIST1H2BN, HIST1H4A, HIST1H2BF, HIST1H2BJ, HIST1H2AJ, HIST1H3E, HIST3H3, HIST2H4A	605	87	13528	2.31314	1	0.827533	51.5448
GOTERM_BP_FAT	GO:0007050~cell cycle arrest	10	1.14155	0.0405531	GAS2L3, CDKN1A, AK1, GAS2L2, PKD2, RPRM, MTBP, GAS1, TP73, TGFB2	605	103	13528	2.17091	1	0.825224	51.8685
GOTERM_BP_FAT	GO:0051726~regulation of cell cycle	23	2.62557	0.0410537	E2F1, DLGAP5, SPHK1, RPRM, HERC5, CENPF, PKMYT1, RPS27L, PDE3A, AFAP1L2, GAS1, UBE2C, CDK2, TGFB2, CCNB1, PRKCQ, CDKN1A, HNF4A, MTBP, BUB1B, BMP7, EGF, CABLES1	605	331	13528	1.55374	1	0.824002	52.3102
GOTERM_BP_FAT	GO:0010941~regulation of cell death	48	5.47945	0.0420058	DCC, TMX1, ADAMTSL4, ERBB2, MGMT, MITF, FOXO1, CD70, RPS27L, PAWR, TGFB2, ACVR1C, DPF1, MSX2, SLC11A2, PECR, TMEM102, CAT, DDAH2, ALX4, PHLDA3, TOP2A, NET1, RAB27A, PGAP2, IL6, AIFM3, NOX5, PTPRF, SPHK1, PDE3A, GAS1, F7, ANXA4, TP73, PPIF, ATP7A, SMO, NME2, CDKN1A, MSX1, KRT18, NUPR1, PRLR, SFRP1, BMP7, IFI6, SMPD2	605	815	13528	1.31693	1	0.826186	53.1397
GOTERM_BP_FAT	GO:0048015~phosphoinositide-mediated signaling	9	1.0274	0.0425586	AGTR1, HIST4H4, HIST1H4A, CA8, ERBB2, BUB1B, NDC80, UBE2C, HIST2H4A, HTR2C, TOP2A	605	88	13528	2.28685	1	0.825382	53.615
GOTERM_BP_FAT	GO:0015669~gas transport	4	0.456621	0.0438401	HBQ1, IPCEF1, CA2, AQP1	605	18	13528	4.96896	1	0.829801	54.6995
GOTERM_BP_FAT	GO:0050801~ion homeostasis	27	3.08219	0.0438688	FXYD1, PRX, KCNMB4, GRIK1, ERBB2, TRHR, HFE, LPAR2, KCNA5, SLC11A2, BEST2, AGTR1, CXCR4, SLC30A1, PKD2, TRPV4, OLIG2, JPH1, PLP1, AIFM3, FZD2, SLC9A3R1, ATP7A, SLC4A10, CXCL13, CLDN1, IFI6	605	409	13528	1.47611	1	0.825305	54.7235
GOTERM_BP_FAT	GO:0009150~purine ribonucleotide metabolic process	12	1.36986	0.0448111	ATP7A, ATP1B1, ATP2B3, NME2, AK1, AK5, MYH7, CTNS, NT5E, ATP13A5, ATP8B4, ATP13A4	605	138	13528	1.94438	1	0.827274	55.5052
GOTERM_BP_FAT	GO:0046034~ATP metabolic process	10	1.14155	0.0449637	ATP7A, ATP1B1, ATP2B3, AK1, AK5, MYH7, CTNS, ATP13A5, ATP8B4, ATP13A4	605	105	13528	2.12956	1	0.823752	55.6306
GOTERM_BP_FAT	GO:0006644~phospholipid metabolic process	15	1.71233	0.0455568	PGAP3, PGAP2, CPT1B, LPL, CRLS1, SGMS2, PIGW, PIP5K1B, CDS1, ISYNA1, SMPDL3B, MBOAT2, AGPAT4, AGPAT2, SMPD2	605	190	13528	1.76529	1	0.823323	56.1148
GOTERM_BP_FAT	GO:0009144~purine nucleoside triphosphate metabolic process	11	1.25571	0.0462726	ATP7A, ATP1B1, ATP2B3, NME2, AK1, AK5, MYH7, CTNS, ATP13A5, ATP8B4, ATP13A4	605	122	13528	2.0161	1	0.82374	56.6925
GOTERM_BP_FAT	GO:0042136~neurotransmitter biosynthetic process	3	0.342466	0.0465958	NOS1, PAH, GAD1	605	8	13528	8.38512	1	0.821514	56.9511
GOTERM_BP_FAT	GO:0042438~melanin biosynthetic process	3	0.342466	0.0465958	DCT, TYR, OCA2	605	8	13528	8.38512	1	0.821514	56.9511
GOTERM_BP_FAT	GO:0018065~protein-cofactor linkage	3	0.342466	0.0465958	CTH, NNAT, GAD1	605	8	13528	8.38512	1	0.821514	56.9511
GOTERM_BP_FAT	GO:0051100~negative regulation of binding	7	0.799087	0.0471315	PTHLH, SMO, HNF4A, ID1, FOXJ1, CAT, SIGIRR	605	59	13528	2.65292	1	0.820751	57.3763
GOTERM_BP_FAT	GO:0009306~protein secretion	5	0.570776	0.0476444	NOX5, LTBP2, LMF1, ARL4D, CXCL10	605	31	13528	3.6065	1	0.819858	57.7797
GOTERM_BP_FAT	GO:0006873~cellular ion homeostasis	25	2.85388	0.0476868	FXYD1, PRX, KCNMB4, PLP1, AIFM3, GRIK1, ERBB2, TRHR, HFE, LPAR2, KCNA5, FZD2, SLC9A3R1, ATP7A, BEST2, AGTR1, CXCR4, SLC30A1, CXCL13, CLDN1, PKD2, TRPV4, OLIG2, JPH1, IFI6	605	374	13528	1.49467	1	0.815863	57.8129
GOTERM_BP_FAT	GO:0043433~negative regulation of transcription factor activity	6	0.684932	0.0490508	PTHLH, HNF4A, ID1, FOXJ1, CAT, SIGIRR	605	45	13528	2.98138	1	0.820607	58.8676
GOTERM_BP_FAT	GO:0009072~aromatic amino acid family metabolic process	4	0.456621	0.0503866	DCT, ATP7A, TYR, PAH	605	19	13528	4.70744	1	0.824944	59.8763
GOTERM_BP_FAT	GO:0015674~di-, tri-valent inorganic cation transport	14	1.59817	0.0518403	TRPM4, TRPC7, SLC24A5, HFE, CACNB3, ANXA6, SLC11A2, ATP2B3, SLC24A4, PKD2, TRPV4, JPH1, CHRNA10, STEAP1	605	176	13528	1.77866	1	0.829782	60.9475
GOTERM_BP_FAT	GO:0044242~cellular lipid catabolic process	8	0.913242	0.052638	ACOX2, ACADVL, LPL, CPT1B, CPT2, SMPDL3B, SPHK1, ETFDH	605	76	13528	2.35372	1	0.830569	61.5238
GOTERM_BP_FAT	GO:0030308~negative regulation of cell growth	9	1.0274	0.0529529	CDKN1A, CTH, NRP1, HNF4A, TRO, TNK1, OSGIN1, TP73, TGFB2	605	92	13528	2.18742	1	0.828527	61.7491
GOTERM_BP_FAT	GO:0008203~cholesterol metabolic process	9	1.0274	0.0529529	ACAA2, CYP39A1, CUBN, CYP27A1, LEPR, CAT, PRKAA2, PMVK, LDLRAP1	605	92	13528	2.18742	1	0.828527	61.7491
GOTERM_BP_FAT	GO:0055082~cellular chemical homeostasis	25	2.85388	0.0546382	FXYD1, PRX, KCNMB4, PLP1, AIFM3, GRIK1, ERBB2, TRHR, HFE, LPAR2, KCNA5, FZD2, SLC9A3R1, ATP7A, BEST2, AGTR1, CXCR4, SLC30A1, CXCL13, CLDN1, PKD2, TRPV4, OLIG2, JPH1, IFI6	605	380	13528	1.47107	1	0.834371	62.9337
GOTERM_BP_FAT	GO:0015698~inorganic anion transport	9	1.0274	0.0557847	FXYD1, SLC4A10, SLC5A5, SLC12A2, SLC20A2, SLC12A4, CLIC6, SLC13A4, MPST	605	93	13528	2.1639	1	0.836978	63.7197
GOTERM_BP_FAT	GO:0034728~nucleosome organization	9	1.0274	0.0557847	HIST1H2BB, HIST4H4, HIST1H1D, HIST1H2BN, HIST1H4A, HIST1H2BF, HIST1H2BJ, HIST1H2AJ, HIST1H3E, HIST3H3, HIST2H4A	605	93	13528	2.1639	1	0.836978	63.7197
GOTERM_BP_FAT	GO:0006582~melanin metabolic process	3	0.342466	0.0581722	DCT, TYR, OCA2	605	9	13528	7.45344	1	0.845953	65.3064
GOTERM_BP_FAT	GO:0006570~tyrosine metabolic process	3	0.342466	0.0581722	DCT, TYR, PAH	605	9	13528	7.45344	1	0.845953	65.3064
GOTERM_BP_FAT	GO:0048870~cell motility	21	2.39726	0.0586108	DNAH11, DCC, NRTN, IL6, NRP1, FOXJ1, BARHL2, DNAH3, DCDC2, DNAH1, DNAH2, ISL1, DNAH5, TGFB2, SMO, RSPH4A, CXCR4, ID1, PEX2, TEKT2, SEMA3C	605	307	13528	1.52953	1	0.844646	65.5908
GOTERM_BP_FAT	GO:0051674~localization of cell	21	2.39726	0.0586108	DNAH11, DCC, NRTN, IL6, NRP1, FOXJ1, BARHL2, DNAH3, DCDC2, DNAH1, DNAH2, ISL1, DNAH5, TGFB2, SMO, RSPH4A, CXCR4, ID1, PEX2, TEKT2, SEMA3C	605	307	13528	1.52953	1	0.844646	65.5908
GOTERM_BP_FAT	GO:0009310~amine catabolic process	8	0.913242	0.0590392	BCAT1, NOS1, DIO3, AASS, PAH, DDAH2, CDO1, GAD1	605	78	13528	2.29337	1	0.843308	65.8663
GOTERM_BP_FAT	GO:0006631~fatty acid metabolic process	15	1.71233	0.0602748	ACOX2, CPT1B, ACAA2, LPL, PLP1, TBXAS1, CPT2, ACSF2, ACADVL, PECR, ETFDH, ELOVL7, PRKAA2, SLC27A3, CROT	605	198	13528	1.69396	1	0.846023	66.6494
GOTERM_BP_FAT	GO:0010038~response to metal ion	11	1.25571	0.0629818	SLC11A2, ATP7A, KCNMB4, BSG, AQP9, TNNC1, SERPINA1, CA2, HVCN1, CNGA3, IGFBP2	605	129	13528	1.90669	1	0.855538	68.3062
GOTERM_BP_FAT	GO:0019637~organophosphate metabolic process	15	1.71233	0.0644045	PGAP3, PGAP2, CPT1B, LPL, CRLS1, SGMS2, PIGW, PIP5K1B, CDS1, ISYNA1, SMPDL3B, MBOAT2, AGPAT4, AGPAT2, SMPD2	605	200	13528	1.67702	1	0.858705	69.1455
GOTERM_BP_FAT	GO:0009259~ribonucleotide metabolic process	12	1.36986	0.0648589	ATP7A, ATP1B1, ATP2B3, NME2, AK1, AK5, MYH7, CTNS, NT5E, ATP13A5, ATP8B4, ATP13A4	605	147	13528	1.82533	1	0.857517	69.4091
GOTERM_BP_FAT	GO:0019217~regulation of fatty acid metabolic process	6	0.684932	0.0663776	CPT1B, IRS2, CPT2, CAB39L, HNF4A, PRKAA2	605	49	13528	2.738	1	0.860972	70.2749
GOTERM_BP_FAT	GO:0009141~nucleoside triphosphate metabolic process	11	1.25571	0.0683879	ATP7A, ATP1B1, ATP2B3, NME2, AK1, AK5, MYH7, CTNS, ATP13A5, ATP8B4, ATP13A4	605	131	13528	1.87759	1	0.866297	71.3853
GOTERM_BP_FAT	GO:0009309~amine biosynthetic process	8	0.913242	0.0695028	BCAT1, ADI1, CTH, ASS1, NAGS, PAH, CDO1, TGFB2	605	81	13528	2.20843	1	0.867797	71.9842
GOTERM_BP_FAT	GO:0006790~sulfur metabolic process	10	1.14155	0.071766	ADI1, CTH, OCLN, GSTK1, CHST9, SULF1, GNMT, CTNS, CDO1, GLCE	605	115	13528	1.94438	1	0.873667	73.1637
GOTERM_BP_FAT	GO:0045792~negative regulation of cell size	9	1.0274	0.0747781	CDKN1A, CTH, NRP1, HNF4A, TRO, TNK1, OSGIN1, TP73, TGFB2	605	99	13528	2.03276	1	0.881833	74.6611
GOTERM_BP_FAT	GO:0009062~fatty acid catabolic process	5	0.570776	0.0751089	ACOX2, ACADVL, CPT1B, CPT2, ETFDH	605	36	13528	3.1056	1	0.880258	74.8206
GOTERM_BP_FAT	GO:0010035~response to inorganic substance	15	1.71233	0.075543	KCNMB4, BSG, AQP9, TNNC1, MYH7, HVCN1, CNGA3, SLC11A2, ATP7A, CDKN1A, TPO, SERPINA1, CA2, CAT, IGFBP2	605	205	13528	1.63612	1	0.87906	75.0285
GOTERM_BP_FAT	GO:0014031~mesenchymal cell development	6	0.684932	0.0761647	SMO, NRTN, SEMA3C, ISL1, BMP7, TGFB2	605	51	13528	2.63063	1	0.878534	75.3235
GOTERM_BP_FAT	GO:0048762~mesenchymal cell differentiation	6	0.684932	0.0761647	SMO, NRTN, SEMA3C, ISL1, BMP7, TGFB2	605	51	13528	2.63063	1	0.878534	75.3235
GOTERM_BP_FAT	GO:0042391~regulation of membrane potential	11	1.25571	0.0770348	PRX, BEST2, KCNMB4, PLP1, AIFM3, GRIK1, ERBB2, CLDN1, OLIG2, KCNA5, IFI6	605	134	13528	1.83555	1	0.87888	75.7308
GOTERM_BP_FAT	GO:0050670~regulation of lymphocyte proliferation	8	0.913242	0.0770556	PRKCQ, CDKN1A, IL6, FOXJ1, ERBB2, PAWR, IL15, IL13RA1	605	83	13528	2.15521	1	0.876289	75.7405
GOTERM_BP_FAT	GO:0042592~homeostatic process	43	4.90868	0.0773955	PRX, FXYD1, TMX1, KCNMB4, AQP9, GRIK1, ERBB2, TRHR, PRDX4, HFE, PDIA5, LPAR2, KCNA5, BEST2, SLC11A2, AGTR1, CXCR4, SLC30A1, PKD2, TRPV4, OLIG2, JPH1, LPL, IRS2, IL6, PLP1, CUBN, AIFM3, SLC12A2, SLC12A4, NXNL1, BPGM, FZD2, SLC9A3R1, LDLRAP1, PTHLH, ATP7A, SLC4A10, CCNB2, HNF4A, CXCL13, CLDN1, IFI6	605	751	13528	1.28029	1	0.874817	75.8978
GOTERM_BP_FAT	GO:0008361~regulation of cell size	15	1.71233	0.0779121	FGFR2, ENOX2, NRP1, SPHK1, OSGIN1, TP73, TGFB2, CTH, CDKN1A, NUPR1, HNF4A, TRO, TNK1, ODF3B, EMP1	605	206	13528	1.62818	1	0.873977	76.1351
GOTERM_BP_FAT	GO:0006800~oxygen and reactive oxygen species metabolic process	7	0.799087	0.0779382	ATP7A, AGTR1, CYBA, NOX5, NOXA1, TPO, CAT	605	67	13528	2.33615	1	0.871432	76.147
GOTERM_BP_FAT	GO:0001755~neural crest cell migration	4	0.456621	0.0808779	SMO, NRTN, SEMA3C, ISL1	605	23	13528	3.88875	1	0.878873	77.4551
GOTERM_BP_FAT	GO:0015695~organic cation transport	4	0.456621	0.0808779	CPT1B, CPT2, SLC12A2, AQP1	605	23	13528	3.88875	1	0.878873	77.4551
GOTERM_BP_FAT	GO:0000096~sulfur amino acid metabolic process	4	0.456621	0.0808779	ADI1, CTH, GNMT, CDO1	605	23	13528	3.88875	1	0.878873	77.4551
GOTERM_BP_FAT	GO:0070663~regulation of leukocyte proliferation	8	0.913242	0.081005	PRKCQ, CDKN1A, IL6, FOXJ1, ERBB2, PAWR, IL15, IL13RA1	605	84	13528	2.12956	1	0.876763	77.5102
GOTERM_BP_FAT	GO:0032944~regulation of mononuclear cell proliferation	8	0.913242	0.081005	PRKCQ, CDKN1A, IL6, FOXJ1, ERBB2, PAWR, IL15, IL13RA1	605	84	13528	2.12956	1	0.876763	77.5102
GOTERM_BP_FAT	GO:0060485~mesenchyme development	6	0.684932	0.0813349	SMO, NRTN, SEMA3C, ISL1, BMP7, TGFB2	605	52	13528	2.58004	1	0.875336	77.6523
GOTERM_BP_FAT	GO:0001667~ameboidal cell migration	5	0.570776	0.081384	SMO, NRTN, CXCR4, SEMA3C, ISL1	605	37	13528	3.02167	1	0.87298	77.6734
GOTERM_BP_FAT	GO:0051480~cytosolic calcium ion homeostasis	10	1.14155	0.0813987	AGTR1, CXCR4, CXCL13, TRHR, PKD2, TRPV4, LPAR2, FZD2, KCNA5, JPH1	605	118	13528	1.89494	1	0.870509	77.6797
GOTERM_BP_FAT	GO:0008283~cell proliferation	27	3.08219	0.0819545	E2F1, BCAT1, TMX1, ERBB2, CD70, EHF, IL15, TGFB2, KIF2C, CXCR4, FRAT2, COL8A1, COL8A2, ASPM, OCA2, FZD9, IRS2, NOX5, DLGAP5, KIF15, CENPF, GAS6, CDK3, UHRF1, BUB1B, TCF19, EMP1	605	436	13528	1.3847	1	0.869879	77.9171
GOTERM_BP_FAT	GO:0048858~cell projection morphogenesis	17	1.94064	0.0823157	DCC, NRP1, FOXJ1, ERBB2, DYNC2LI1, DPYSL5, GAS1, DNAI2, ISL1, ATP7A, EPHA4, SMO, CXCR4, TNR, BMP7, SPON2, GAP43	605	245	13528	1.55153	1	0.868603	78.07
GOTERM_BP_FAT	GO:0009063~cellular amino acid catabolic process	7	0.799087	0.0824319	BCAT1, NOS1, AASS, PAH, DDAH2, CDO1, GAD1	605	68	13528	2.3018	1	0.866507	78.1191
GOTERM_BP_FAT	GO:0006684~sphingomyelin metabolic process	3	0.342466	0.0838259	SGMS2, SMPDL3B, SMPD2	605	11	13528	6.09827	1	0.868729	78.6989
GOTERM_BP_FAT	GO:0031099~regeneration	7	0.799087	0.0870668	CCNB1, PRKCQ, SMO, CDKN1A, HTR2C, GAS6, GAP43	605	69	13528	2.26844	1	0.876742	79.9913
GOTERM_BP_FAT	GO:0015993~molecular hydrogen transport	2	0.228311	0.087306	ADHFE1, SLC23A2	605	2	13528	22.3603	1	0.875142	80.0837
GOTERM_BP_FAT	GO:0006583~melanin biosynthetic process from tyrosine	2	0.228311	0.087306	DCT, TYR	605	2	13528	22.3603	1	0.875142	80.0837
GOTERM_BP_FAT	GO:0048545~response to steroid hormone stimulus	14	1.59817	0.0889735	IL6, LEPR, ERBB2, AQP1, CNGA3, CDO1, TGFB2, CDKN1A, BCHE, CA4, SERPINA1, CA2, IGFBP2, BMP7	605	192	13528	1.63044	1	0.877945	80.7167
GOTERM_BP_FAT	GO:0051101~regulation of DNA binding	10	1.14155	0.0917759	PTHLH, PRKCQ, SMO, NME2, IL6, HNF4A, ID1, FOXJ1, CAT, SIGIRR	605	121	13528	1.84796	1	0.883933	81.738
GOTERM_BP_FAT	GO:0042476~odontogenesis	6	0.684932	0.0922186	SMO, BSG, SOSTDC1, CA2, BMP7, TGFB2	605	54	13528	2.48448	1	0.882992	81.8946
GOTERM_BP_FAT	GO:0019228~regulation of action potential in neuron	6	0.684932	0.0922186	PRX, KCNMB4, PLP1, ERBB2, CLDN1, OLIG2	605	54	13528	2.48448	1	0.882992	81.8946
GOTERM_BP_FAT	GO:0051262~protein tetramerization	5	0.570776	0.0946784	CTH, PFKP, AASS, CAT, GNMT	605	39	13528	2.86671	1	0.887691	82.7419
GOTERM_BP_FAT	GO:0042475~odontogenesis of dentine-containing tooth	5	0.570776	0.0946784	SMO, BSG, SOSTDC1, CA2, BMP7	605	39	13528	2.86671	1	0.887691	82.7419
GOTERM_BP_FAT	GO:0019395~fatty acid oxidation	5	0.570776	0.0946784	ACOX2, ACADVL, CPT1B, CPT2, ETFDH	605	39	13528	2.86671	1	0.887691	82.7419
GOTERM_BP_FAT	GO:0034440~lipid oxidation	5	0.570776	0.0946784	ACOX2, ACADVL, CPT1B, CPT2, ETFDH	605	39	13528	2.86671	1	0.887691	82.7419
GOTERM_BP_FAT	GO:0014068~positive regulation of phosphoinositide 3-kinase cascade	3	0.342466	0.0977101	ERBB2, CAT, TGFB2	605	12	13528	5.59008	1	0.893622	83.7347
GOTERM_BP_FAT	GO:0006801~superoxide metabolic process	4	0.456621	0.098487	ATP7A, CYBA, NOX5, NOXA1	605	25	13528	3.57765	1	0.893564	83.9803

## Sheet: Y300-Y30_up
Category	Term	Count	%	PValue	Genes	List Total	Pop Hits	Pop Total	Fold Enrichment	Bonferroni	Benjamini	FDR
GOTERM_BP_FAT	GO:0050953~sensory perception of light stimulus	29	4.63259	3.97368e-09	RBP4, GLRA1, RBP3, NDP, CABP4, NR2E3, CRYBB1, RDH8, ELOVL4, SLC24A1, IMPDH1, RLBP1, CRYBB2, GUCA1A, BFSP2, CRYZ, PDE6H, RGS16, KCNV2, PDE6G, RGS9BP, CNGA1, RDH12, GABRR2, TULP1, PRCD, PPEF2, PDC, ROM1	488	216	13528	3.72184	9.54077e-06	9.54077e-06	6.97777e-06
GOTERM_BP_FAT	GO:0007601~visual perception	29	4.63259	3.97368e-09	RBP4, GLRA1, RBP3, NDP, CABP4, NR2E3, CRYBB1, RDH8, ELOVL4, SLC24A1, IMPDH1, RLBP1, CRYBB2, GUCA1A, BFSP2, CRYZ, PDE6H, RGS16, KCNV2, PDE6G, RGS9BP, CNGA1, RDH12, GABRR2, TULP1, PRCD, PPEF2, PDC, ROM1	488	216	13528	3.72184	9.54077e-06	9.54077e-06	6.97777e-06
GOTERM_BP_FAT	GO:0019226~transmission of nerve impulse	31	4.95208	1.00096e-05	SCN1B, SYT4, GLRA1, SLC6A4, DRD4, ADORA1, GJC3, ACSBG1, APOE, SLC1A6, SNPH, CNTNAP2, LGI4, NQO1, SNAP25, ERCC2, GABRD, EGR2, GPR176, SPTBN4, LIN7B, PDYN, GRM5, GABRR2, CBLN1, CAMK4, GRIA1, PLLP, PMP22, SST, HTR2A	488	350	13528	2.45532	0.0237468	0.0119447	0.0175754
GOTERM_BP_FAT	GO:0050877~neurological system process	73	11.6613	1.30505e-05	GLRA1, SYT4, TRPV2, SLC6A4, UCHL1, NR2E3, CALB1, ADORA1, KCNIP3, CRYBB1, FOS, RDH8, APOE, ELOVL4, SLC1A6, SNPH, SLC24A1, LGI4, CNTNAP2, NQO1, IMPDH1, CRYBB2, EGR2, C5AR1, GPR176, TRPM8, TMIE, PDYN, NTSR2, CNGA1, GABRR2, GRM5, CBLN1, PRCD, PPEF2, CAMK4, PLLP, PMP22, ROM1, RBP4, SCN1B, NDP, RBP3, DRD4, CABP4, GJC3, ACSBG1, ESPN, AGT, RLBP1, SNAP25, ERCC2, GABRD, GUCA1A, SPTBN4, LIN7B, BFSP2, RGS16,…	488	1210	13528	1.67244	0.0308486	0.0103905	0.0229141
GOTERM_BP_FAT	GO:0006766~vitamin metabolic process	12	1.91693	7.16412e-05	RDH12, ALDH1A2, RBP4, GCLC, SLC22A4, HAAO, PNPO, KMO, TKTL1, GSTO1, PSAT1, RLBP1	488	75	13528	4.43541	0.158035	0.0420926	0.125727
GOTERM_BP_FAT	GO:0009409~response to cold	7	1.11821	7.2193e-05	FOS, ADRB1, TRPM8, DIO2, IL18, AGT, VGF	488	21	13528	9.24044	0.15915	0.0340743	0.126695
GOTERM_BP_FAT	GO:0007202~activation of phospholipase C activity	11	1.75719	0.000100719	GRM5, P2RY6, P2RY11, C5AR1, ANG, AGT, RXFP3, P2RY1, HTR2B, NTSR2, HTR2A	488	65	13528	4.6913	0.214817	0.039505	0.176715
GOTERM_BP_FAT	GO:0010863~positive regulation of phospholipase C activity	11	1.75719	0.000100719	GRM5, P2RY6, P2RY11, C5AR1, ANG, AGT, RXFP3, P2RY1, HTR2B, NTSR2, HTR2A	488	65	13528	4.6913	0.214817	0.039505	0.176715
GOTERM_BP_FAT	GO:0031644~regulation of neurological system process	17	2.71565	0.000126803	SNCG, TF, EDN3, CCK, EGR2, GLRA1, STAR, GRIK3, DRD4, VGF, ADORA1, CALB1, SYP, YWHAH, APOE, AGT, HTR2A	488	153	13528	3.08015	0.262488	0.0425637	0.222432
GOTERM_BP_FAT	GO:0010518~positive regulation of phospholipase activity	11	1.75719	0.000168237	GRM5, P2RY6, P2RY11, C5AR1, ANG, AGT, RXFP3, P2RY1, HTR2B, NTSR2, HTR2A	488	69	13528	4.41934	0.332337	0.0492426	0.295013
GOTERM_BP_FAT	GO:0009266~response to temperature stimulus	12	1.91693	0.000182258	FOS, ADRB1, GCLC, TRPM8, DIO2, CRYAB, TRPV2, HSPB8, IL18, AGT, VGF, SST	488	83	13528	4.0079	0.354443	0.0474634	0.319562
GOTERM_BP_FAT	GO:0006873~cellular ion homeostasis	29	4.63259	0.000209317	TF, JPH3, CCK, GCLC, GLRA1, GRIK3, DRD4, ADORA1, GJC3, ACSBG1, ALAS2, APOE, AQP11, AGT, SLC1A6, LGI4, GNG3, ERCC2, MT3, EGR2, C5AR1, TRPM8, RXFP3, NTSR2, PYGM, RYR3, PLLP, CP, PMP22	488	374	13528	2.14951	0.395059	0.0490201	0.366924
GOTERM_BP_FAT	GO:0010517~regulation of phospholipase activity	11	1.75719	0.000214245	GRM5, P2RY6, P2RY11, C5AR1, ANG, AGT, RXFP3, P2RY1, HTR2B, NTSR2, HTR2A	488	71	13528	4.29485	0.402175	0.045692	0.375547
GOTERM_BP_FAT	GO:0051969~regulation of transmission of nerve impulse	16	2.55591	0.000268059	SNCG, TF, EDN3, EGR2, GLRA1, STAR, GRIK3, DRD4, VGF, ADORA1, CALB1, SYP, YWHAH, APOE, AGT, HTR2A	488	147	13528	3.01729	0.474652	0.052228	0.469667
GOTERM_BP_FAT	GO:0055082~cellular chemical homeostasis	29	4.63259	0.000270961	TF, JPH3, CCK, GCLC, GLRA1, GRIK3, DRD4, ADORA1, GJC3, ACSBG1, ALAS2, APOE, AQP11, AGT, SLC1A6, LGI4, GNG3, ERCC2, MT3, EGR2, C5AR1, TRPM8, RXFP3, NTSR2, PYGM, RYR3, PLLP, CP, PMP22	488	380	13528	2.11557	0.478301	0.0488192	0.47474
GOTERM_BP_FAT	GO:0042391~regulation of membrane potential	15	2.39617	0.000333728	EGR2, GCLC, CCK, GLRA1, GRIK3, DRD4, ADORA1, GJC3, NTSR2, ACSBG1, SLC1A6, LGI4, PLLP, PMP22, ERCC2	488	134	13528	3.10313	0.551306	0.0556362	0.584408
GOTERM_BP_FAT	GO:0060193~positive regulation of lipase activity	11	1.75719	0.000338309	GRM5, P2RY6, P2RY11, C5AR1, ANG, AGT, RXFP3, P2RY1, HTR2B, NTSR2, HTR2A	488	75	13528	4.06579	0.556216	0.0527206	0.592409
GOTERM_BP_FAT	GO:0007200~activation of phospholipase C activity by G-protein coupled receptor protein signaling pathway coupled to IP3 second messenger	9	1.4377	0.000496835	GRM5, P2RY6, P2RY11, AGT, RXFP3, P2RY1, HTR2B, NTSR2, HTR2A	488	52	13528	4.79792	0.69675	0.071862	0.868861
GOTERM_BP_FAT	GO:0006767~water-soluble vitamin metabolic process	8	1.27796	0.000498551	GCLC, SLC22A4, HAAO, PNPO, KMO, TKTL1, GSTO1, PSAT1	488	40	13528	5.54426	0.697997	0.0680075	0.871849
GOTERM_BP_FAT	GO:0050801~ion homeostasis	29	4.63259	0.000877337	TF, JPH3, CCK, GCLC, GLRA1, GRIK3, DRD4, ADORA1, GJC3, ACSBG1, ALAS2, APOE, AQP11, AGT, SLC1A6, LGI4, GNG3, ERCC2, MT3, EGR2, C5AR1, TRPM8, RXFP3, NTSR2, PYGM, RYR3, PLLP, CP, PMP22	488	409	13528	1.96557	0.878448	0.110485	1.52946
GOTERM_BP_FAT	GO:0007267~cell-cell signaling	38	6.07029	0.00100239	EDN3, GAL3ST4, SCN1B, SYT4, GLRA1, IL18, NDP, DRD4, SLC6A4, NMB, VGF, ADORA1, LNPEP, PCSK1, APOE, SLC1A6, AGT, SNPH, FGF1, NQO1, SNAP25, GABRD, GPR176, STC2, LIN7B, GAL, PDYN, GABRR2, GRM5, INHBA, CBLN1, CAMK4, CXCL14, GRIA1, PHEX, PMP22, SST, HTR2A	488	600	13528	1.75568	0.91	0.119032	1.74566
GOTERM_BP_FAT	GO:0010817~regulation of hormone levels	15	2.39617	0.00110664	RBP4, EDN3, STAR, ASMT, VGF, GAL, RDH12, PCSK1, ALDH1A2, RDH8, YWHAH, DIO2, AGT, SNAP25, CRYM	488	151	13528	2.75377	0.929948	0.12447	1.92555
GOTERM_BP_FAT	GO:0060191~regulation of lipase activity	11	1.75719	0.00111229	GRM5, P2RY6, P2RY11, C5AR1, ANG, AGT, RXFP3, P2RY1, HTR2B, NTSR2, HTR2A	488	87	13528	3.50499	0.930893	0.11948	1.93529
GOTERM_BP_FAT	GO:0007268~synaptic transmission	23	3.67412	0.00116613	GABRD, SCN1B, GPR176, GLRA1, SYT4, SLC6A4, DRD4, LIN7B, PDYN, ADORA1, GRM5, GABRR2, CBLN1, CAMK4, GRIA1, APOE, SLC1A6, SNPH, PMP22, NQO1, SST, SNAP25, HTR2A	488	298	13528	2.13956	0.939282	0.119567	2.02806
GOTERM_BP_FAT	GO:0051050~positive regulation of transport	19	3.03514	0.00119063	RBP4, EDN3, CALY, C3, GLUD1, DRD4, TNFSF15, ADORA1, NKX6-1, THY1, P2RY12, INHBA, PCSK1, ANG, APOE, P2RY1, CLEC7A, SNAP25, PDZK1	488	223	13528	2.36191	0.942754	0.116943	2.07026
GOTERM_BP_FAT	GO:0050804~regulation of synaptic transmission	14	2.23642	0.00124558	SNCG, EDN3, EGR2, STAR, GRIK3, DRD4, VGF, ADORA1, CALB1, SYP, YWHAH, APOE, AGT, HTR2A	488	136	13528	2.85366	0.949839	0.117228	2.16483
GOTERM_BP_FAT	GO:0046903~secretion	23	3.67412	0.00127767	SLC22A16, AVPR2, EDN3, NKD2, GLRA1, SYT4, DRD4, LIN7B, AQP5, USE1, AQP4, VGF, GAL, ADORA1, NECAB3, RIMS4, SLC26A7, AGT, SNPH, NPHS1, SLC22A4, SYTL5, SNAP25	488	300	13528	2.1253	0.953563	0.115547	2.22001
GOTERM_BP_FAT	GO:0009628~response to abiotic stimulus	26	4.15335	0.0017967	RBP4, GCLC, TACR3, TRPV2, IL18, CABP4, KMO, NR2E3, VGF, SNN, FOS, AGT, CDKN2D, SLC24A1, ERCC2, GUCA1A, TRPM8, CRYAB, RGS9BP, JUNB, TULP1, ADRB1, DIO2, HSPB8, PDC, SST	488	368	13528	1.95857	0.98667	0.153011	3.1085
GOTERM_BP_FAT	GO:0044057~regulation of system process	23	3.67412	0.00186201	SNCG, TF, EDN3, CCK, EGR2, ADORA3, GLRA1, TACR3, STAR, GRIK3, DRD4, VGF, ADORA1, CALB1, TNNT2, SYP, INHBA, YWHAH, ADRB1, TNNT1, APOE, AGT, HTR2A	488	309	13528	2.0634	0.988608	0.152729	3.21975
GOTERM_BP_FAT	GO:0048167~regulation of synaptic plasticity	9	1.4377	0.00200587	SYP, YWHAH, EGR2, STAR, APOE, AGT, VGF, ADORA1, CALB1	488	64	13528	3.89831	0.991941	0.158169	3.4644
GOTERM_BP_FAT	GO:0042552~myelination	7	1.11821	0.00218676	EGR2, LGI4, PLLP, PMP22, GJC3, ACSBG1, ERCC2	488	38	13528	5.10656	0.994785	0.165771	3.7712
GOTERM_BP_FAT	GO:0030431~sleep	4	0.638978	0.00226792	FOS, IL18, SNAP25, HTR2A	488	8	13528	13.8607	0.99571	0.166161	3.90855
GOTERM_BP_FAT	GO:0009583~detection of light stimulus	7	1.11821	0.00250721	TULP1, GUCA1A, RBP4, PDC, CABP4, NR2E3, RGS9BP	488	39	13528	4.97562	0.997588	0.176697	4.31243
GOTERM_BP_FAT	GO:0009110~vitamin biosynthetic process	6	0.958466	0.00293086	ALDH1A2, HAAO, PNPO, KMO, GSTO1, PSAT1	488	28	13528	5.94028	0.99913	0.197665	5.02357
GOTERM_BP_FAT	GO:0019725~cellular homeostasis	30	4.79233	0.00296282	TF, JPH3, CCK, GCLC, GLRA1, GRIK3, DRD4, ADORA1, GJC3, ACSBG1, ALAS2, APOE, AQP11, SLC1A6, AGT, HAAO, LGI4, GNG3, ERCC2, MT3, EGR2, C5AR1, TRPM8, RXFP3, NTSR2, PYGM, RYR3, PLLP, CP, PMP22	488	466	13528	1.78463	0.999195	0.194174	5.077
GOTERM_BP_FAT	GO:0007610~behavior	30	4.79233	0.00328446	EDN3, SNCG, CCK, GLRA1, IL18, UCHL1, DRD4, CALB1, KCNIP3, ESPN, TAL2, FOS, AGT, SNAP25, EGR2, C5AR1, SPTBN4, MET, FOSB, GAL, CXCL14, PENK, PTGDS, GRIA1, PRKAR1B, CX3CR1, C1QL1, PLAU, HTR2A, CMTM5	488	469	13528	1.77322	0.999629	0.20731	5.61329
GOTERM_BP_FAT	GO:0007272~ensheathment of neurons	7	1.11821	0.00368139	EGR2, LGI4, PLLP, PMP22, GJC3, ACSBG1, ERCC2	488	42	13528	4.62022	0.999857	0.22354	6.27118
GOTERM_BP_FAT	GO:0051591~response to cAMP	7	1.11821	0.00368139	FOS, PYGM, NME1, C1S, PTPRN, VGF, JUNB	488	42	13528	4.62022	0.999857	0.22354	6.27118
GOTERM_BP_FAT	GO:0008366~axon ensheathment	7	1.11821	0.00368139	EGR2, LGI4, PLLP, PMP22, GJC3, ACSBG1, ERCC2	488	42	13528	4.62022	0.999857	0.22354	6.27118
GOTERM_BP_FAT	GO:0048015~phosphoinositide-mediated signaling	10	1.59744	0.00433236	GRM5, EDN3, P2RY6, P2RY11, AGT, RXFP3, P2RY1, HTR2B, NTSR2, HTR2A	488	88	13528	3.15015	0.99997	0.251416	7.34075
GOTERM_BP_FAT	GO:0006811~ion transport	43	6.86901	0.0044312	STEAP3, SLC8A3, KCNJ16, SLC22A16, TF, JPH3, SCN1B, SLC5A4, GLRA1, KCNAB1, TRPV2, GRIK3, GABRB1, KCNK13, KCNIP3, P2RY6, AQP11, SLC1A6, KCNK6, SLC24A1, SLC22A4, SLC39A8, CAMK2B, GABRD, MLC1, TRPM8, TRPC5, KCNV2, KCTD4, CNGA1, ARMC1, KCNJ5, TST, GABRR2, SLC16A3, SLC26A7, GRIA1, RYR3, KCNH6, SLC13A2, PLLP, CP, PDZK1	488	768	13528	1.5521	0.999977	0.250379	7.50214
GOTERM_BP_FAT	GO:0042445~hormone metabolic process	11	1.75719	0.00483852	RDH12, RDH8, ALDH1A2, RBP4, PCSK1, YWHAH, DIO2, STAR, ASMT, AGT, CRYM	488	106	13528	2.87674	0.999991	0.263952	8.16442
GOTERM_BP_FAT	GO:0051345~positive regulation of hydrolase activity	15	2.39617	0.00532661	CCK, C5AR1, RXFP3, TNFSF15, NTSR2, THY1, TNNT2, GRM5, P2RY6, P2RY11, ANG, AGT, P2RY1, HTR2B, HTR2A	488	179	13528	2.32301	0.999997	0.280216	8.95215
GOTERM_BP_FAT	GO:0030308~negative regulation of cell growth	10	1.59744	0.00580934	RERG, INHBA, TSPYL2, CCDC85B, CDKN2C, CRYAB, AGT, CDKN2D, PSRC1, IP6K2	488	92	13528	3.01319	0.999999	0.295116	9.72497
GOTERM_BP_FAT	GO:0048878~chemical homeostasis	31	4.95208	0.00605498	RBP4, TF, JPH3, CCK, GCLC, GLRA1, GRIK3, DRD4, VGF, ADORA1, GJC3, ACSBG1, ALAS2, APOE, AQP11, SLC1A6, AGT, LGI4, GNG3, MT3, ERCC2, EGR2, C5AR1, TRPM8, RXFP3, NTSR2, PYGM, RYR3, PLLP, CP, PMP22	488	512	13528	1.67844	1	0.299292	10.1158
GOTERM_BP_FAT	GO:0045926~negative regulation of growth	11	1.75719	0.00627598	RERG, INHBA, TSPYL2, ADRB1, CCDC85B, CDKN2C, CRYAB, AGT, CDKN2D, PSRC1, IP6K2	488	110	13528	2.77213	1	0.302259	10.4661
GOTERM_BP_FAT	GO:0045859~regulation of protein kinase activity	23	3.67412	0.00691778	EDN3, CCK, C5AR1, DRD4, MET, TNFSF15, TRIB3, MAP4K1, PDE6H, ADORA1, PDE6G, THY1, TSPYL2, DGKB, CDKN2C, ANG, APOE, CDKN2D, PRKAR1B, PAK1, GNG3, GADD45A, HTR2A	488	345	13528	1.84809	1	0.321324	11.4761
GOTERM_BP_FAT	GO:0051260~protein homooligomerization	10	1.59744	0.00715133	C1QTNF7, TRPM8, GLRA1, AQP11, CRYAB, ALDOC, ALOX5AP, GPX3, ANGPT1, HSF4	488	95	13528	2.91803	1	0.324051	11.841
GOTERM_BP_FAT	GO:0042364~water-soluble vitamin biosynthetic process	5	0.798722	0.00852411	HAAO, PNPO, KMO, GSTO1, PSAT1	488	23	13528	6.02637	1	0.366667	13.9571
GOTERM_BP_FAT	GO:0002793~positive regulation of peptide secretion	5	0.798722	0.00852411	RBP4, GLUD1, ADORA1, SNAP25, NKX6-1	488	23	13528	6.02637	1	0.366667	13.9571
GOTERM_BP_FAT	GO:0048168~regulation of neuronal synaptic plasticity	6	0.958466	0.00888382	SYP, EGR2, STAR, APOE, AGT, VGF	488	36	13528	4.62022	1	0.372348	14.5037
GOTERM_BP_FAT	GO:0046887~positive regulation of hormone secretion	6	0.958466	0.00888382	EDN3, INHBA, RBP4, GLUD1, SNAP25, NKX6-1	488	36	13528	4.62022	1	0.372348	14.5037
GOTERM_BP_FAT	GO:0045792~negative regulation of cell size	10	1.59744	0.00929487	RERG, INHBA, TSPYL2, CCDC85B, CDKN2C, CRYAB, AGT, CDKN2D, PSRC1, IP6K2	488	99	13528	2.80013	1	0.379389	15.1242
GOTERM_BP_FAT	GO:0006936~muscle contraction	13	2.07668	0.00930357	TNNT2, EDN3, TNNT1, GLRA1, CRYAB, AGT, RYR3, MYH2, PGAM2, TRIM63, GAL, CASQ2, SGCA	488	153	13528	2.35541	1	0.373465	15.1373
GOTERM_BP_FAT	GO:0043549~regulation of kinase activity	23	3.67412	0.010132	EDN3, CCK, C5AR1, DRD4, MET, TNFSF15, TRIB3, MAP4K1, PDE6H, ADORA1, PDE6G, THY1, TSPYL2, DGKB, CDKN2C, ANG, APOE, CDKN2D, PRKAR1B, PAK1, GNG3, GADD45A, HTR2A	488	357	13528	1.78597	1	0.392864	16.3748
GOTERM_BP_FAT	GO:0001508~regulation of action potential	8	1.27796	0.0109495	EGR2, GLRA1, LGI4, PLLP, PMP22, GJC3, ACSBG1, ERCC2	488	68	13528	3.26133	1	0.410628	17.5793
GOTERM_BP_FAT	GO:0019932~second-messenger-mediated signaling	17	2.71565	0.0109869	EDN3, AVPR2, RXFP3, DRD4, ADORA1, NTSR2, BTK, P2RY12, GRM5, P2RY6, ADRB1, P2RY11, APOE, AGT, P2RY1, HTR2B, HTR2A	488	235	13528	2.00537	1	0.405543	17.6339
GOTERM_BP_FAT	GO:0009416~response to light stimulus	12	1.91693	0.0111457	TULP1, GUCA1A, FOS, RBP4, CDKN2D, SLC24A1, PDC, CABP4, NR2E3, JUNB, RGS9BP, ERCC2	488	138	13528	2.41055	1	0.404002	17.8658
GOTERM_BP_FAT	GO:0043406~positive regulation of MAP kinase activity	10	1.59744	0.0111973	EDN3, C5AR1, MET, DRD4, MAP4K1, GNG3, PAK1, PDE6H, PDE6G, HTR2A	488	102	13528	2.71778	1	0.399576	17.9411
GOTERM_BP_FAT	GO:0010001~glial cell differentiation	7	1.11821	0.0115711	METRN, EGR2, CDKN2C, AGT, C1S, NKX6-1, ERCC2	488	53	13528	3.66131	1	0.403982	18.4842
GOTERM_BP_FAT	GO:0050890~cognition	47	7.50799	0.0118138	RBP4, GLRA1, TRPV2, RBP3, NDP, CABP4, NR2E3, CALB1, GJC3, ESPN, KCNIP3, CRYBB1, RDH8, FOS, ELOVL4, SLC24A1, SNAP25, IMPDH1, RLBP1, CRYBB2, GUCA1A, C5AR1, EGR2, TRPM8, TMIE, SPTBN4, BFSP2, RGS16, PDE6H, CRYZ, KCNV2, PDE6G, NTSR2, CNGA1, RGS9BP, GABRR2, RDH12, TULP1, PENK, PPEF2, PRCD, GRIA1, PRKAR1B, PDC, CRYM, ROM1, HTR2A	488	909	13528	1.43334	1	0.404763	18.8349
GOTERM_BP_FAT	GO:0014070~response to organic cyclic substance	11	1.75719	0.0119634	CD83, TF, FOS, PCSK1, TACR3, PLIN2, STAR, ALDOC, DRD4, ALDH2, JUNB	488	121	13528	2.52012	1	0.403112	19.0505
GOTERM_BP_FAT	GO:0044093~positive regulation of molecular function	33	5.27157	0.0126121	AVPR2, EDN3, CCK, ADORA3, DRD4, TNFSF15, MAP4K1, ADORA1, P2RY6, DGKB, ANG, APOE, AGT, P2RY1, GNG3, PAK1, ERCC2, C5AR1, RXFP3, MET, PDE6H, PDE6G, NTSR2, THY1, TNNT2, GRM5, ADRB1, P2RY11, NME1, PRKAR1B, EDF1, HTR2B, HTR2A	488	586	13528	1.5611	1	0.414118	19.9787
GOTERM_BP_FAT	GO:0019228~regulation of action potential in neuron	7	1.11821	0.0126335	EGR2, LGI4, PLLP, PMP22, GJC3, ACSBG1, ERCC2	488	54	13528	3.5935	1	0.409221	20.0091
GOTERM_BP_FAT	GO:0050878~regulation of body fluid levels	12	1.91693	0.0129534	P2RY12, APLNR, AVPR2, FGG, F5, FGB, CD59, P2RY1, MST1, SLC22A4, ENTPD2, PLAU	488	141	13528	2.35926	1	0.411737	20.4629
GOTERM_BP_FAT	GO:0043405~regulation of MAP kinase activity	12	1.91693	0.0129534	EDN3, C5AR1, APOE, MET, DRD4, MAP4K1, TRIB3, GNG3, PAK1, PDE6H, PDE6G, HTR2A	488	141	13528	2.35926	1	0.411737	20.4629
GOTERM_BP_FAT	GO:0043085~positive regulation of catalytic activity	30	4.79233	0.0132457	AVPR2, EDN3, CCK, ADORA3, DRD4, TNFSF15, MAP4K1, ADORA1, P2RY6, DGKB, ANG, APOE, AGT, P2RY1, GNG3, PAK1, C5AR1, RXFP3, MET, PDE6H, PDE6G, NTSR2, THY1, TNNT2, GRM5, ADRB1, P2RY11, PRKAR1B, HTR2B, HTR2A	488	520	13528	1.59931	1	0.413504	20.8755
GOTERM_BP_FAT	GO:0006897~endocytosis	16	2.55591	0.013508	LY75, RAMP3, CALY, HCK, ADORA1, MARCH3, SYP, AP1S1, GRIA1, APOE, NME1, FCGR1A, CLEC7A, BIN1, LRP4, SH3GL2	488	220	13528	2.0161	1	0.41451	21.2441
GOTERM_BP_FAT	GO:0010324~membrane invagination	16	2.55591	0.013508	LY75, RAMP3, CALY, HCK, ADORA1, MARCH3, SYP, AP1S1, GRIA1, APOE, NME1, FCGR1A, CLEC7A, BIN1, LRP4, SH3GL2	488	220	13528	2.0161	1	0.41451	21.2441
GOTERM_BP_FAT	GO:0043010~camera-type eye development	10	1.59744	0.014996	ALDH1A2, RBP4, CRYGS, CRYAB, CABP4, HSF4, NR2E3, BMPR1B, CRYBB2, THY1	488	107	13528	2.59078	1	0.442967	23.3043
GOTERM_BP_FAT	GO:0045860~positive regulation of protein kinase activity	16	2.55591	0.0151025	EDN3, CCK, C5AR1, DRD4, MET, TNFSF15, MAP4K1, PDE6H, ADORA1, PDE6G, DGKB, ANG, PRKAR1B, PAK1, GNG3, HTR2A	488	223	13528	1.98897	1	0.440082	23.4498
GOTERM_BP_FAT	GO:0051338~regulation of transferase activity	23	3.67412	0.0156751	EDN3, CCK, C5AR1, DRD4, MET, TNFSF15, TRIB3, MAP4K1, PDE6H, ADORA1, PDE6G, THY1, TSPYL2, DGKB, CDKN2C, ANG, APOE, CDKN2D, PRKAR1B, PAK1, GNG3, GADD45A, HTR2A	488	372	13528	1.71395	1	0.447178	24.2275
GOTERM_BP_FAT	GO:0007599~hemostasis	10	1.59744	0.0158574	P2RY12, AVPR2, FGG, F5, FGB, CD59, P2RY1, MST1, ENTPD2, PLAU	488	108	13528	2.56679	1	0.445918	24.4735
GOTERM_BP_FAT	GO:0010035~response to inorganic substance	15	2.39617	0.0164418	TNNT2, FOS, PCSK1, FGG, GCLC, STAR, APOE, FGB, CRYAB, EEF1A2, GPX3, HAAO, PGAM2, NDRG1, MT3	488	205	13528	2.02839	1	0.45289	25.2572
GOTERM_BP_FAT	GO:0051047~positive regulation of secretion	10	1.59744	0.0167546	EDN3, INHBA, RBP4, PCSK1, ANG, GLUD1, TNFSF15, ADORA1, SNAP25, NKX6-1	488	109	13528	2.54324	1	0.454199	25.6735
GOTERM_BP_FAT	GO:0009581~detection of external stimulus	8	1.27796	0.0169326	TULP1, GUCA1A, RBP4, PDC, CABP4, CLEC7A, NR2E3, RGS9BP	488	74	13528	2.9969	1	0.452826	25.9094
GOTERM_BP_FAT	GO:0030001~metal ion transport	27	4.3131	0.0176746	SLC8A3, KCNJ16, STEAP3, TF, JPH3, SLC5A4, SCN1B, KCNAB1, TRPV2, KCNK13, KCNIP3, KCNK6, SLC24A1, SLC39A8, SLC22A4, CAMK2B, TRPM8, TRPC5, KCNV2, KCTD4, ARMC1, CNGA1, KCNJ5, RYR3, KCNH6, SLC13A2, CP	488	465	13528	1.60962	1	0.462337	26.8853
GOTERM_BP_FAT	GO:0006833~water transport	4	0.638978	0.018306	AQP11, AQP5, AQP4, SLC14A1	488	16	13528	6.93033	1	0.469382	27.7061
GOTERM_BP_FAT	GO:0003012~muscle system process	13	2.07668	0.0184426	TNNT2, EDN3, TNNT1, GLRA1, CRYAB, AGT, RYR3, MYH2, PGAM2, TRIM63, GAL, CASQ2, SGCA	488	168	13528	2.1451	1	0.467138	27.8826
GOTERM_BP_FAT	GO:0034754~cellular hormone metabolic process	7	1.11821	0.0189827	RDH12, RDH8, ALDH1A2, RBP4, YWHAH, STAR, ASMT	488	59	13528	3.28897	1	0.472236	28.5763
GOTERM_BP_FAT	GO:0033674~positive regulation of kinase activity	16	2.55591	0.0201216	EDN3, CCK, C5AR1, DRD4, MET, TNFSF15, MAP4K1, PDE6H, ADORA1, PDE6G, DGKB, ANG, PRKAR1B, PAK1, GNG3, HTR2A	488	231	13528	1.92009	1	0.487553	30.0184
GOTERM_BP_FAT	GO:0006720~isoprenoid metabolic process	6	0.958466	0.020262	RDH12, ALDH1A2, RBP4, RARRES2, MVK, RLBP1	488	44	13528	3.78018	1	0.4853	30.1942
GOTERM_BP_FAT	GO:0001654~eye development	11	1.75719	0.0208828	ALDH1A2, RBP4, RARG, CRYGS, CRYAB, CABP4, HSF4, NR2E3, BMPR1B, CRYBB2, THY1	488	132	13528	2.31011	1	0.491152	30.9669
GOTERM_BP_FAT	GO:0042044~fluid transport	4	0.638978	0.0216464	AQP11, AQP5, AQP4, SLC14A1	488	17	13528	6.52266	1	0.499109	31.9063
GOTERM_BP_FAT	GO:0019318~hexose metabolic process	14	2.23642	0.0216537	RBP4, CRYAB, ALDOC, PGAM2, TKTL1, GYG1, FUCA2, PPP1R3C, ATF3, PYGM, PPP1R1A, GFPT2, GALE, DCXR	488	192	13528	2.02135	1	0.494708	31.9151
GOTERM_BP_FAT	GO:0050768~negative regulation of neurogenesis	6	0.958466	0.0221421	ATF5, YWHAH, ID4, NKX6-1, THY1, MT3	488	45	13528	3.69617	1	0.498041	32.5095
GOTERM_BP_FAT	GO:0007216~metabotropic glutamate receptor signaling pathway	3	0.479233	0.0240842	GRM5, HOMER3, GRIK3	488	7	13528	11.8806	1	0.523332	34.825
GOTERM_BP_FAT	GO:0070207~protein homotrimerization	3	0.479233	0.0240842	TRPM8, ALOX5AP, HSF4	488	7	13528	11.8806	1	0.523332	34.825
GOTERM_BP_FAT	GO:0015838~betaine transport	3	0.479233	0.0240842	SLC22A16, SLC22A4, PDZK1	488	7	13528	11.8806	1	0.523332	34.825
GOTERM_BP_FAT	GO:0015879~carnitine transport	3	0.479233	0.0240842	SLC22A16, SLC22A4, PDZK1	488	7	13528	11.8806	1	0.523332	34.825
GOTERM_BP_FAT	GO:0051967~negative regulation of synaptic transmission, glutamatergic	3	0.479233	0.0240842	GRIK3, ADORA1, HTR2A	488	7	13528	11.8806	1	0.523332	34.825
GOTERM_BP_FAT	GO:0046394~carboxylic acid biosynthetic process	12	1.91693	0.0244574	GGT5, PTGDS, STAR, ELOVL4, ALOX5AP, GLUD1, HAAO, LTC4S, GSTO1, PSAT1, FADS6, DEGS2	488	155	13528	2.14617	1	0.524389	35.2613
GOTERM_BP_FAT	GO:0016053~organic acid biosynthetic process	12	1.91693	0.0244574	GGT5, PTGDS, STAR, ELOVL4, ALOX5AP, GLUD1, HAAO, LTC4S, GSTO1, PSAT1, FADS6, DEGS2	488	155	13528	2.14617	1	0.524389	35.2613
GOTERM_BP_FAT	GO:0015669~gas transport	4	0.638978	0.0252967	HBM, AQP5, NGB, HBB	488	18	13528	6.16029	1	0.532095	36.2323
GOTERM_BP_FAT	GO:0032024~positive regulation of insulin secretion	4	0.638978	0.0252967	RBP4, GLUD1, SNAP25, NKX6-1	488	18	13528	6.16029	1	0.532095	36.2323
GOTERM_BP_FAT	GO:0031667~response to nutrient levels	14	2.23642	0.0260644	RBP4, CCK, RARG, STC2, STAR, HRK, PCSK1, ALDH1A2, ALB, CDKN2D, CTSD, ANGPT1, CP, SST	488	197	13528	1.97004	1	0.538512	37.1086
GOTERM_BP_FAT	GO:0007600~sensory perception	41	6.54952	0.0261306	RBP4, GLRA1, TRPV2, RBP3, NDP, CABP4, NR2E3, GJC3, KCNIP3, ESPN, CRYBB1, RDH8, ELOVL4, SLC24A1, IMPDH1, RLBP1, CRYBB2, GUCA1A, C5AR1, TRPM8, TMIE, SPTBN4, BFSP2, RGS16, PDE6H, CRYZ, KCNV2, PDE6G, NTSR2, CNGA1, RGS9BP, GABRR2, RDH12, TULP1, PENK, PPEF2, PRCD, PDC, CRYM, ROM1, HTR2A	488	810	13528	1.40318	1	0.535108	37.1836
GOTERM_BP_FAT	GO:0051347~positive regulation of transferase activity	16	2.55591	0.0267669	EDN3, CCK, C5AR1, DRD4, MET, TNFSF15, MAP4K1, PDE6H, ADORA1, PDE6G, DGKB, ANG, PRKAR1B, PAK1, GNG3, HTR2A	488	240	13528	1.84809	1	0.539533	37.9005
GOTERM_BP_FAT	GO:0009991~response to extracellular stimulus	15	2.39617	0.0282099	RBP4, CCK, RARG, STC2, STAR, HRK, PCSK1, ALDH1A2, FOS, ALB, CDKN2D, CTSD, ANGPT1, CP, SST	488	220	13528	1.89009	1	0.554386	39.4975
GOTERM_BP_FAT	GO:0010721~negative regulation of cell development	6	0.958466	0.0284479	ATF5, YWHAH, ID4, NKX6-1, THY1, MT3	488	48	13528	3.46516	1	0.553243	39.7572
GOTERM_BP_FAT	GO:0009582~detection of abiotic stimulus	7	1.11821	0.0291148	TULP1, GUCA1A, RBP4, PDC, CABP4, NR2E3, RGS9BP	488	65	13528	2.98537	1	0.557552	40.4793
GOTERM_BP_FAT	GO:0042063~gliogenesis	7	1.11821	0.0291148	METRN, EGR2, CDKN2C, AGT, C1S, NKX6-1, ERCC2	488	65	13528	2.98537	1	0.557552	40.4793
GOTERM_BP_FAT	GO:0042596~fear response	4	0.638978	0.0292561	CCK, ADRB1, PENK, DRD4	488	19	13528	5.83607	1	0.555202	40.6311
GOTERM_BP_FAT	GO:0007602~phototransduction	5	0.798722	0.0297359	TULP1, GUCA1A, PDC, CABP4, NR2E3	488	33	13528	4.2002	1	0.557082	41.1443
GOTERM_BP_FAT	GO:0048489~synaptic vesicle transport	5	0.798722	0.0297359	SYP, SNPH, BIN1, SNAP25, SH3GL2	488	33	13528	4.2002	1	0.557082	41.1443
GOTERM_BP_FAT	GO:0042325~regulation of phosphorylation	26	4.15335	0.0302754	EDN3, CCK, DRD4, TNFSF15, MAP4K1, TRIB3, IL34, ADORA1, DGKB, TSPYL2, CDKN2C, APOE, ANG, AGT, CDKN2D, PAK1, GNG3, C5AR1, MET, PDE6H, PDE6G, THY1, INHBA, PRKAR1B, GADD45A, HTR2A	488	466	13528	1.54668	1	0.559638	41.7164
GOTERM_BP_FAT	GO:0007596~blood coagulation	9	1.4377	0.0306699	P2RY12, FGG, F5, FGB, CD59, P2RY1, MST1, ENTPD2, PLAU	488	102	13528	2.446	1	0.560397	42.1314
GOTERM_BP_FAT	GO:0050817~coagulation	9	1.4377	0.0306699	P2RY12, FGG, F5, FGB, CD59, P2RY1, MST1, ENTPD2, PLAU	488	102	13528	2.446	1	0.560397	42.1314
GOTERM_BP_FAT	GO:0046883~regulation of hormone secretion	7	1.11821	0.0310913	EDN3, INHBA, RBP4, GLUD1, ADORA1, SNAP25, NKX6-1	488	66	13528	2.94014	1	0.561457	42.5716
GOTERM_BP_FAT	GO:0051046~regulation of secretion	14	2.23642	0.0311033	SNCG, RBP4, EDN3, GLUD1, DRD4, TNFSF15, ADORA1, NKX6-1, INHBA, PCSK1, ANG, AGT, SNAP25, HTR2A	488	202	13528	1.92128	1	0.557694	42.584
GOTERM_BP_FAT	GO:0070482~response to oxygen levels	11	1.75719	0.0311811	TF, NOL3, ALAS2, PYGM, ANG, IL18, ALDOC, ALDH2, ANGPT1, PLAU, MT3	488	141	13528	2.16266	1	0.554753	42.6649
GOTERM_BP_FAT	GO:0051241~negative regulation of multicellular organismal process	12	1.91693	0.0349847	TIGIT, CD83, INHBA, RBP4, ADRB1, TNNT1, GLRA1, APOE, GRIK3, ADORA1, PLAU, HTR2A	488	164	13528	2.02839	1	0.593443	46.4917
GOTERM_BP_FAT	GO:0060041~retina development in camera-type eye	5	0.798722	0.0359859	RBP4, CABP4, NR2E3, BMPR1B, THY1	488	35	13528	3.96019	1	0.60013	47.4582
GOTERM_BP_FAT	GO:0009719~response to endogenous stimulus	23	3.67412	0.0360462	RBP4, EGR2, GCLC, TACR3, STAR, CRYAB, ALDOC, DRD4, PTPRN, VGF, GAL, JUNB, RERG, PCSK1, ALDH1A2, FOS, GSTM3, ANG, PRKAR1B, ALDH2, ANGPT1, GNG3, SST	488	405	13528	1.5743	1	0.596957	47.5159
GOTERM_BP_FAT	GO:0051336~regulation of hydrolase activity	20	3.19489	0.0362011	CCK, C5AR1, STMN3, RXFP3, TNFSF15, TPM2, NTSR2, ADAP1, THY1, TNNT2, GRM5, P2RY6, P2RY11, ANG, AGT, CDKN2D, P2RY1, HTR2B, ARAP2, HTR2A	488	337	13528	1.64518	1	0.594802	47.6638
GOTERM_BP_FAT	GO:0046660~female sex differentiation	7	1.11821	0.0375386	INHBA, RBP4, ANG, AGT, ANGPT1, BMPR1B, VGF	488	69	13528	2.81231	1	0.60463	48.9246
GOTERM_BP_FAT	GO:0046545~development of primary female sexual characteristics	7	1.11821	0.0375386	INHBA, RBP4, ANG, AGT, ANGPT1, BMPR1B, VGF	488	69	13528	2.81231	1	0.60463	48.9246
GOTERM_BP_FAT	GO:0007422~peripheral nervous system development	5	0.798722	0.0393737	GSTM3, EGR2, AGT, PMP22, GFRA3	488	36	13528	3.85018	1	0.618817	50.6079
GOTERM_BP_FAT	GO:0050880~regulation of blood vessel size	6	0.958466	0.0412714	EDN3, ADRB1, GCLC, APOE, AGT, HBB	488	53	13528	3.13826	1	0.632832	52.2936
GOTERM_BP_FAT	GO:0035150~regulation of tube size	6	0.958466	0.0412714	EDN3, ADRB1, GCLC, APOE, AGT, HBB	488	53	13528	3.13826	1	0.632832	52.2936
GOTERM_BP_FAT	GO:0048511~rhythmic process	10	1.59744	0.0415875	DDC, INHBA, EGR2, PTGDS, ANG, AGT, ANGPT1, ARNTL, BMPR1B, VGF	488	128	13528	2.16573	1	0.632074	52.569
GOTERM_BP_FAT	GO:0009725~response to hormone stimulus	21	3.35463	0.0427461	RBP4, EGR2, GCLC, TACR3, STAR, CRYAB, PTPRN, VGF, GAL, JUNB, RERG, PCSK1, ALDH1A2, FOS, GSTM3, ANG, PRKAR1B, ALDH2, ANGPT1, GNG3, SST	488	367	13528	1.58623	1	0.638815	53.5659
GOTERM_BP_FAT	GO:0006812~cation transport	29	4.63259	0.0431173	SLC8A3, KCNJ16, STEAP3, TF, SLC22A16, JPH3, SLC5A4, SCN1B, KCNAB1, TRPV2, KCNK13, KCNIP3, KCNK6, SLC24A1, SLC22A4, SLC39A8, CAMK2B, TRPM8, TRPC5, KCNV2, KCTD4, ARMC1, CNGA1, KCNJ5, RYR3, KCNH6, SLC13A2, CP, PDZK1	488	553	13528	1.45374	1	0.638512	53.881
GOTERM_BP_FAT	GO:0051174~regulation of phosphorus metabolic process	26	4.15335	0.0457475	EDN3, CCK, DRD4, TNFSF15, MAP4K1, TRIB3, IL34, ADORA1, DGKB, TSPYL2, CDKN2C, APOE, ANG, AGT, CDKN2D, PAK1, GNG3, C5AR1, MET, PDE6H, PDE6G, THY1, INHBA, PRKAR1B, GADD45A, HTR2A	488	485	13528	1.48609	1	0.657258	56.0572
GOTERM_BP_FAT	GO:0019220~regulation of phosphate metabolic process	26	4.15335	0.0457475	EDN3, CCK, DRD4, TNFSF15, MAP4K1, TRIB3, IL34, ADORA1, DGKB, TSPYL2, CDKN2C, APOE, ANG, AGT, CDKN2D, PAK1, GNG3, C5AR1, MET, PDE6H, PDE6G, THY1, INHBA, PRKAR1B, GADD45A, HTR2A	488	485	13528	1.48609	1	0.657258	56.0572
GOTERM_BP_FAT	GO:0020027~hemoglobin metabolic process	3	0.479233	0.0480601	INHBA, ALAS2, AHSP	488	10	13528	8.31639	1	0.672293	57.8902
GOTERM_BP_FAT	GO:0010460~positive regulation of heart rate	3	0.479233	0.0480601	EDN3, ADRB1, TACR3	488	10	13528	8.31639	1	0.672293	57.8902
GOTERM_BP_FAT	GO:0001558~regulation of cell growth	13	2.07668	0.0480981	CCDC85B, CRYAB, PSRC1, ESM1, IL17RB, RERG, INHBA, TSPYL2, APOE, CDKN2C, CDKN2D, AGT, IP6K2	488	194	13528	1.85761	1	0.669155	57.9196
GOTERM_BP_FAT	GO:0001523~retinoid metabolic process	4	0.638978	0.0481306	RDH12, ALDH1A2, RBP4, RARRES2	488	23	13528	4.8211	1	0.666003	57.9449
GOTERM_BP_FAT	GO:0016101~diterpenoid metabolic process	4	0.638978	0.0481306	RDH12, ALDH1A2, RBP4, RARRES2	488	23	13528	4.8211	1	0.666003	57.9449
GOTERM_BP_FAT	GO:0045777~positive regulation of blood pressure	4	0.638978	0.0481306	ADRB1, TACR3, AGT, ADORA1	488	23	13528	4.8211	1	0.666003	57.9449
GOTERM_BP_FAT	GO:0006776~vitamin A metabolic process	4	0.638978	0.0481306	RDH12, ALDH1A2, RBP4, RLBP1	488	23	13528	4.8211	1	0.666003	57.9449
GOTERM_BP_FAT	GO:0006006~glucose metabolic process	11	1.75719	0.0498669	RBP4, PPP1R3C, ATF3, PYGM, CRYAB, PPP1R1A, ALDOC, PGAM2, TKTL1, GYG1, DCXR	488	153	13528	1.99304	1	0.675924	59.2717
GOTERM_BP_FAT	GO:0033555~multicellular organismal response to stress	5	0.798722	0.0505903	CCK, ADRB1, PENK, DRD4, KCNIP3	488	39	13528	3.55401	1	0.677986	59.8129
GOTERM_BP_FAT	GO:0001666~response to hypoxia	10	1.59744	0.0529169	TF, NOL3, ALAS2, PYGM, ANG, IL18, ALDOC, ANGPT1, PLAU, MT3	488	134	13528	2.06875	1	0.691497	61.5076
GOTERM_BP_FAT	GO:0051180~vitamin transport	4	0.638978	0.0535859	SLC22A16, RBP4, SLC22A4, PDZK1	488	24	13528	4.62022	1	0.692928	61.9823
GOTERM_BP_FAT	GO:0007588~excretion	6	0.958466	0.0570945	AVPR2, AGT, NPHS1, AQP5, AQP4, ADORA1	488	58	13528	2.86772	1	0.713249	64.3826
GOTERM_BP_FAT	GO:0003018~vascular process in circulatory system	6	0.958466	0.0570945	EDN3, ADRB1, GCLC, APOE, AGT, HBB	488	58	13528	2.86772	1	0.713249	64.3826
GOTERM_BP_FAT	GO:0045686~negative regulation of glial cell differentiation	3	0.479233	0.0573704	ATF5, ID4, NKX6-1	488	11	13528	7.56036	1	0.711871	64.5652
GOTERM_BP_FAT	GO:0045742~positive regulation of epidermal growth factor receptor signaling pathway	3	0.479233	0.0573704	AGT, PDE6H, PDE6G	488	11	13528	7.56036	1	0.711871	64.5652
GOTERM_BP_FAT	GO:0014014~negative regulation of gliogenesis	3	0.479233	0.0573704	ATF5, ID4, NKX6-1	488	11	13528	7.56036	1	0.711871	64.5652
GOTERM_BP_FAT	GO:0005996~monosaccharide metabolic process	14	2.23642	0.0582035	RBP4, CRYAB, ALDOC, PGAM2, TKTL1, GYG1, FUCA2, PPP1R3C, ATF3, PYGM, PPP1R1A, GFPT2, GALE, DCXR	488	222	13528	1.74819	1	0.714064	65.1111
GOTERM_BP_FAT	GO:0001541~ovarian follicle development	5	0.798722	0.0589405	INHBA, ANG, ANGPT1, BMPR1B, VGF	488	41	13528	3.38065	1	0.715607	65.5875
GOTERM_BP_FAT	GO:0051970~negative regulation of transmission of nerve impulse	4	0.638978	0.0593239	GLRA1, GRIK3, ADORA1, HTR2A	488	25	13528	4.43541	1	0.714928	65.8328
GOTERM_BP_FAT	GO:0006721~terpenoid metabolic process	4	0.638978	0.0593239	RDH12, ALDH1A2, RBP4, RARRES2	488	25	13528	4.43541	1	0.714928	65.8328
GOTERM_BP_FAT	GO:0007166~cell surface receptor linked signal transduction	80	12.7796	0.0615831	EDN3, GNA14, ADORA3, TACR3, GPR160, GLRA1, GRIK3, ADORA1, FOS, HEY1, APOE, HOMER3, CXCR6, ANGPT1, GNG3, NPSR1, CIB2, FGF1, RAMP3, PTGER1, C5AR1, GPR176, RARG, STC2, RXFP3, PROKR1, PDYN, GAL, NTSR2, GPR37L1, THY1, GABRR2, GRM5, CD3EAP, INHBA, DOK2, ADRB1, LPAR5, CX3CR1, CNTN1, RASD1, AVPR2, CALY, CCK, NKD2, GPR61, C3, NDP, DRD4, ITGB4, NMB, ADAP1, CPZ, APLNR, EPHB6, P2RY6, DGKB, AGT, P2RY1, ADAM33…	488	1856	13528	1.19488	1	0.725637	67.2454
GOTERM_BP_FAT	GO:0051606~detection of stimulus	9	1.4377	0.0628784	TULP1, GUCA1A, RBP4, PPEF2, PDC, CABP4, CLEC7A, NR2E3, RGS9BP	488	118	13528	2.11434	1	0.730262	68.0304
GOTERM_BP_FAT	GO:0043270~positive regulation of ion transport	5	0.798722	0.0633741	P2RY12, P2RY1, ADORA1, PDZK1, THY1	488	42	13528	3.30016	1	0.730172	68.326
GOTERM_BP_FAT	GO:0060341~regulation of cellular localization	15	2.39617	0.0647594	SNCG, RBP4, EDN3, CRYAB, GLUD1, DRD4, TNFSF15, ADORA1, NKX6-1, INHBA, PCSK1, ANG, AGT, SNAP25, HTR2A	488	248	13528	1.67669	1	0.73513	69.1387
GOTERM_BP_FAT	GO:0006633~fatty acid biosynthetic process	7	1.11821	0.0648757	GGT5, PTGDS, ELOVL4, ALOX5AP, LTC4S, FADS6, DEGS2	488	79	13528	2.45632	1	0.732885	69.206
GOTERM_BP_FAT	GO:0019748~secondary metabolic process	7	1.11821	0.0648757	RDH12, ALDH1A2, RBP4, RARRES2, HAAO, KMO, DCXR	488	79	13528	2.45632	1	0.732885	69.206
GOTERM_BP_FAT	GO:0043269~regulation of ion transport	8	1.27796	0.0660174	P2RY12, JPH3, P2RY1, DRD4, ADORA1, PDZK1, HTR2A, THY1	488	99	13528	2.24011	1	0.736365	69.8595
GOTERM_BP_FAT	GO:0009611~response to wounding	27	4.3131	0.0660396	TF, ADORA3, C3, MASP2, MST1, C1S, ADORA1, FOS, PCSK1, FGG, MEFV, FGB, P2RY1, ENTPD2, LY75, C4A, MYH2, LYZ, GAL, P2RY12, F5, CD59, CX3CR1, PLLP, CLEC7A, BMPR1B, PLAU	488	530	13528	1.41222	1	0.733638	69.8721
GOTERM_BP_FAT	GO:0007186~G-protein coupled receptor protein signaling pathway	51	8.14696	0.0664168	GNA14, ADORA3, TACR3, GLRA1, GPR160, GRIK3, ADORA1, APOE, HOMER3, CXCR6, GNG3, NPSR1, RAMP3, PTGER1, C5AR1, GPR176, RXFP3, PROKR1, GAL, PDYN, NTSR2, GPR37L1, GRM5, GABRR2, ADRB1, LPAR5, CX3CR1, RASD1, AVPR2, CALY, CCK, GPR61, C3, DRD4, NMB, APLNR, P2RY6, DGKB, AGT, P2RY1, ENTPD2, RGS19, P2RY12, GPR34, P2RY11, PENK, GPR37, PDC, HTR2B, SST, HTR2A	488	1123	13528	1.25894	1	0.732884	70.0851
GOTERM_BP_FAT	GO:0015697~quaternary ammonium group transport	3	0.479233	0.0672442	SLC22A16, SLC22A4, PDZK1	488	12	13528	6.93033	1	0.734593	70.5472
GOTERM_BP_FAT	GO:0006112~energy reserve metabolic process	5	0.798722	0.0679776	PPP1R3C, PYGM, PPP1R1A, GFPT2, GYG1	488	43	13528	3.22341	1	0.735766	70.9512
GOTERM_BP_FAT	GO:0042592~homeostatic process	36	5.7508	0.070415	TF, RBP4, JPH3, CCK, GCLC, GLRA1, GRIK3, DRD4, VGF, ADORA1, GJC3, ACSBG1, ALAS2, ANG, AQP11, APOE, SLC1A6, AGT, HAAO, LGI4, GNG3, MT3, ERCC2, C5AR1, EGR2, TRPM8, RXFP3, NTSR2, INHBA, ADRB1, PYGM, RYR3, PLLP, CP, PMP22, HTR2A	488	751	13528	1.32885	1	0.745801	72.2567
GOTERM_BP_FAT	GO:0008065~establishment of blood-nerve barrier	2	0.319489	0.0707054	GSTM3, AGT	488	2	13528	27.7213	1	0.744578	72.4085
GOTERM_BP_FAT	GO:0032940~secretion by cell	13	2.07668	0.0711783	EDN3, NKD2, SYT4, GLRA1, LIN7B, USE1, VGF, GAL, NECAB3, RIMS4, SNPH, SYTL5, SNAP25	488	207	13528	1.74095	1	0.744298	72.6541
GOTERM_BP_FAT	GO:0022602~ovulation cycle process	6	0.958466	0.0719352	INHBA, ANG, AGT, ANGPT1, BMPR1B, VGF	488	62	13528	2.68271	1	0.745453	73.0427
GOTERM_BP_FAT	GO:0000187~activation of MAPK activity	7	1.11821	0.0748716	C5AR1, MET, DRD4, MAP4K1, GNG3, PDE6H, PDE6G	488	82	13528	2.36645	1	0.757208	74.5019
GOTERM_BP_FAT	GO:0030003~cellular cation homeostasis	15	2.39617	0.0756369	TF, JPH3, C5AR1, TRPM8, RXFP3, DRD4, ALAS2, PYGM, AQP11, APOE, AGT, RYR3, GNG3, CP, MT3	488	254	13528	1.63709	1	0.758249	74.8697
GOTERM_BP_FAT	GO:0002021~response to dietary excess	3	0.479233	0.0776291	ADRB1, APOE, VGF	488	13	13528	6.39723	1	0.764938	75.804
GOTERM_BP_FAT	GO:0015671~oxygen transport	3	0.479233	0.0776291	HBM, NGB, HBB	488	13	13528	6.39723	1	0.764938	75.804
GOTERM_BP_FAT	GO:0070206~protein trimerization	3	0.479233	0.0776291	TRPM8, ALOX5AP, HSF4	488	13	13528	6.39723	1	0.764938	75.804
GOTERM_BP_FAT	GO:0031645~negative regulation of neurological system process	4	0.638978	0.0781584	GLRA1, GRIK3, ADORA1, HTR2A	488	28	13528	3.96019	1	0.764817	76.0467
GOTERM_BP_FAT	GO:0006836~neurotransmitter transport	7	1.11821	0.0783877	SYT4, SNPH, SLC6A4, LIN7B, SV2C, SNAP25, RIMS4	488	83	13528	2.33794	1	0.763343	76.1511
GOTERM_BP_FAT	GO:0048514~blood vessel morphogenesis	13	2.07668	0.0795174	IL18, JUNB, THY1, ANGPTL6, HEY1, APOE, ANG, AGT, ITGA7, ANGPT1, FGF1, TNFAIP2, PLAU	488	211	13528	1.70795	1	0.765926	76.6593
GOTERM_BP_FAT	GO:0008585~female gonad development	6	0.958466	0.0800747	INHBA, ANG, AGT, ANGPT1, BMPR1B, VGF	488	64	13528	2.59887	1	0.765929	76.9062
GOTERM_BP_FAT	GO:0006941~striated muscle contraction	5	0.798722	0.0827869	TNNT1, RYR3, MYH2, PGAM2, CASQ2	488	46	13528	3.01319	1	0.775232	78.073
GOTERM_BP_FAT	GO:0002791~regulation of peptide secretion	5	0.798722	0.0827869	RBP4, GLUD1, ADORA1, SNAP25, NKX6-1	488	46	13528	3.01319	1	0.775232	78.073
GOTERM_BP_FAT	GO:0046942~carboxylic acid transport	10	1.59744	0.0838779	SLC16A3, SLC22A16, SLC16A4, PLIN2, SLC26A7, SLC1A6, DRD4, SLC22A4, PDZK1, SLC43A2	488	147	13528	1.8858	1	0.777413	78.5266
GOTERM_BP_FAT	GO:0006958~complement activation, classical pathway	4	0.638978	0.0849491	C4A, C3, MASP2, C1S	488	29	13528	3.82363	1	0.779466	78.9632
GOTERM_BP_FAT	GO:0003001~generation of a signal involved in cell-cell signaling	7	1.11821	0.0856941	EDN3, SYT4, SNPH, LIN7B, GAL, VGF, SNAP25	488	85	13528	2.28293	1	0.780154	79.2619
GOTERM_BP_FAT	GO:0015849~organic acid transport	10	1.59744	0.0866317	SLC16A3, SLC22A16, SLC16A4, PLIN2, SLC26A7, SLC1A6, DRD4, SLC22A4, PDZK1, SLC43A2	488	148	13528	1.87306	1	0.781608	79.6322
GOTERM_BP_FAT	GO:0048545~response to steroid hormone stimulus	12	1.91693	0.0870155	FOS, ALDH1A2, PCSK1, GSTM3, TACR3, CRYAB, ALDH2, ANGPT1, PTPRN, GAL, SST, JUNB	488	192	13528	1.73258	1	0.780829	79.782
GOTERM_BP_FAT	GO:0051960~regulation of nervous system development	12	1.91693	0.0870155	TF, IRX3, ATF5, METRN, YWHAH, STAR, APOE, ID4, SNAP25, NKX6-1, THY1, MT3	488	192	13528	1.73258	1	0.780829	79.782
GOTERM_BP_FAT	GO:0045823~positive regulation of heart contraction	3	0.479233	0.0884757	EDN3, ADRB1, TACR3	488	14	13528	5.94028	1	0.784316	80.3423
GOTERM_BP_FAT	GO:0007263~nitric oxide mediated signal transduction	3	0.479233	0.0884757	APOE, AGT, RASD1	488	14	13528	5.94028	1	0.784316	80.3423
GOTERM_BP_FAT	GO:0009651~response to salt stress	3	0.479233	0.0884757	TACR3, AGT, KMO	488	14	13528	5.94028	1	0.784316	80.3423
GOTERM_BP_FAT	GO:0016051~carbohydrate biosynthetic process	8	1.27796	0.0911903	B3GAT2, RBP4, PPP1R3C, ATF3, B3GALNT1, GFPT2, PGAM2, GYG1	488	107	13528	2.07262	1	0.792471	81.3454
GOTERM_BP_FAT	GO:0010033~response to organic substance	34	5.43131	0.0925942	RBP4, TF, GCLC, TACR3, STAR, ALDOC, DRD4, C1S, VGF, LIN28B, FOS, PCSK1, ALDH1A2, GSTM3, PLIN2, ANG, APOE, ANGPT1, GNG3, CARD9, EGR2, CRYAB, GAL, PTPRN, JUNB, RERG, CD83, PYGM, NME1, PRKAR1B, ALDH2, DNAJB2, CLEC7A, SST	488	721	13528	1.30725	1	0.795469	81.845
GOTERM_BP_FAT	GO:0042698~ovulation cycle	6	0.958466	0.0931628	INHBA, ANG, AGT, ANGPT1, BMPR1B, VGF	488	67	13528	2.48251	1	0.795356	82.0437
GOTERM_BP_FAT	GO:0022610~biological adhesion	33	5.27157	0.0976595	CLDN18, EPDR1, NELL1, ITGB4, HMCN2, VCAM1, LAMB3, COL7A1, AGT, COMP, CNTNAP2, KIRREL2, GPNMB, THBS3, SDSL, CTNNA3, THY1, AMIGO2, PODXL2, F5, HEPACAM, NME1, CDH18, NPHS1, CX3CR1, ITGA7, CD99L2, FBLN7, CNTN1, CLEC7A, BMPR1B, CDH10, ROM1	488	701	13528	1.305	1	0.809087	83.5447
GOTERM_BP_FAT	GO:0009914~hormone transport	5	0.798722	0.0990382	EDN3, GAL, VGF, SNAP25, CRYM	488	49	13528	2.82871	1	0.811635	83.9806
GOTERM_BP_FAT	GO:0002455~humoral immune response mediated by circulating immunoglobulin	4	0.638978	0.0992459	C4A, C3, MASP2, C1S	488	31	13528	3.57694	1	0.810238	84.0453
GOTERM_BP_FAT	GO:0046456~icosanoid biosynthetic process	4	0.638978	0.0992459	GGT5, PTGDS, ALOX5AP, LTC4S	488	31	13528	3.57694	1	0.810238	84.0453
GOTERM_BP_FAT	GO:0060042~retina morphogenesis in camera-type eye	3	0.479233	0.0997374	RBP4, CABP4, THY1	488	15	13528	5.54426	1	0.809799	84.1975
GOTERM_BP_FAT	GO:0002209~behavioral defense response	3	0.479233	0.0997374	CCK, PENK, DRD4	488	15	13528	5.54426	1	0.809799	84.1975
GOTERM_BP_FAT	GO:0001662~behavioral fear response	3	0.479233	0.0997374	CCK, PENK, DRD4	488	15	13528	5.54426	1	0.809799	84.1975

## Sheet: Y300-Y30_down
Category	Term	Count	%	PValue	Genes	List Total	Pop Hits	Pop Total	Fold Enrichment	Bonferroni	Benjamini	FDR
GOTERM_BP_FAT	GO:0006811~ion transport	79	7.3694	4.95925e-07	KCNC1, ATP1B1, SLC5A5, CPT2, SLC13A5, KCNC3, GRIK1, AQP1, HVCN1, KCNJ13, ATP2B2, KCNQ4, ATP2B3, SLC24A4, GRIN2B, SLC23A2, TRPV4, SLCO1C1, SLC4A2, JPH1, OCA2, CHRNA3, SLC22A2, SLC4A5, SGK1, SLC22A8, GRIN2A, SLC24A5, CDK2, KCNT2, CLIC5, CLIC6, SLC41A1, KCNH8, SLC30A10, KCNH3, STEAP1, MPST, FXYD1, KCNMB4, ENPP1, SLC39A12, HFE, CACNB3, SLC38A11, KCNA5, BEST2, SLC11A2, SLCO1A2, SLC30A1, PKD2, SCN9A, S…	778	768	13528	1.78863	0.00147776	0.00147776	0.000892396
GOTERM_BP_FAT	GO:0030001~metal ion transport	54	5.03731	1.30514e-06	KCNC1, SLC5A5, ATP1B1, SLC13A5, KCNC3, KCNJ13, ATP2B2, KCNQ4, ATP2B3, SLC24A4, GRIN2B, SLC23A2, TRPV4, JPH1, SLC4A5, SGK1, SLC24A5, GRIN2A, CDK2, KCNT2, KCNH8, SLC30A10, KCNH3, STEAP1, KCNMB4, SLC39A12, HFE, CACNB3, SLC38A11, KCNA5, SLC11A2, SLC30A1, SCN9A, PKD2, SLC31A1, SCNN1A, SCN5A, SLC39A2, NFATC1, SLC12A2, SLC12A4, TRPC7, SLC10A5, ATP7A, SLC4A10, SLC17A1, KCNN2, ATP2A1, SLC13A1, KCNF1, SLC5…	778	465	13528	2.01927	0.00388438	0.00194408	0.00234854
GOTERM_BP_FAT	GO:0006812~cation transport	61	5.6903	1.3456e-06	KCNC1, ATP1B1, SLC5A5, SLC13A5, KCNC3, CPT2, AQP1, HVCN1, KCNJ13, ATP2B2, KCNQ4, ATP2B3, SLC24A4, GRIN2B, SLC23A2, TRPV4, JPH1, SLC22A2, SLC4A5, SGK1, SLC24A5, GRIN2A, CDK2, KCNT2, SLC41A1, KCNH8, SLC30A10, KCNH3, STEAP1, KCNMB4, SLC39A12, HFE, CACNB3, SLC38A11, KCNA5, SLC11A2, SLC30A1, PKD2, SCN9A, SLC31A1, SCNN1A, SCN5A, SLC39A2, NFATC1, SLC12A2, SLC12A4, TRPC7, SLC10A5, ATP13A5, ATP13A4, ATP7A…	778	553	13528	1.91804	0.00400453	0.00133663	0.00242133
GOTERM_BP_FAT	GO:0007067~mitosis	29	2.70522	6.26436e-05	KIFC1, KNTC1, PKMYT1, ANLN, KIF2C, CDCA8, NCAPH, NCAPG2, FBXO5, CCNA1, CDCA5, ASPM, CDCA3, KIF11, DLGAP5, KIF15, CCNF, KIF18A, CENPF, NDC80, CDC20, PBK, UBE2C, CDK2, NCAPD2, CCNB1, CCNB2, RCC2, BUB1B	778	220	13528	2.29208	0.170398	0.0456285	0.112665
GOTERM_BP_FAT	GO:0000280~nuclear division	29	2.70522	6.26436e-05	KIFC1, KNTC1, PKMYT1, ANLN, KIF2C, CDCA8, NCAPH, NCAPG2, FBXO5, CCNA1, CDCA5, ASPM, CDCA3, KIF11, DLGAP5, KIF15, CCNF, KIF18A, CENPF, NDC80, CDC20, PBK, UBE2C, CDK2, NCAPD2, CCNB1, CCNB2, RCC2, BUB1B	778	220	13528	2.29208	0.170398	0.0456285	0.112665
GOTERM_BP_FAT	GO:0001539~ciliary or flagellar motility	7	0.652985	7.10082e-05	DNAH11, RSPH4A, DNAH3, TEKT2, DNAH1, DNAH2, DNAH5	778	14	13528	8.69409	0.190836	0.0414665	0.1277
GOTERM_BP_FAT	GO:0000087~M phase of mitotic cell cycle	29	2.70522	8.6198e-05	KIFC1, KNTC1, PKMYT1, ANLN, KIF2C, CDCA8, NCAPH, NCAPG2, FBXO5, CCNA1, CDCA5, ASPM, CDCA3, KIF11, DLGAP5, KIF15, CCNF, KIF18A, CENPF, NDC80, CDC20, PBK, UBE2C, CDK2, NCAPD2, CCNB1, CCNB2, RCC2, BUB1B	778	224	13528	2.25115	0.226673	0.0419375	0.154997
GOTERM_BP_FAT	GO:0022403~cell cycle phase	44	4.10448	0.000118824	BCAT1, E2F1, KIFC1, KNTC1, PKMYT1, ANLN, KIF2C, NCAPH, CDCA8, NCAPG2, MTBP, FBXO5, PIWIL2, CCNA1, CDCA5, ASPM, CDCA3, NFATC1, EXO1, EGFR, KIF11, MKI67, DLGAP5, POLE, KIF15, CCNF, KIF18A, CENPF, BRCA2, CDK6, CDC20, NDC80, PBK, UBE2C, RAD54L, CDK2, TACC2, NCAPD2, CCNB1, CCNB3, CDKN1A, CCNB2, RCC2, BUB1B	778	414	13528	1.84802	0.298374	0.0493621	0.213604
GOTERM_BP_FAT	GO:0048285~organelle fission	29	2.70522	0.000126659	KIFC1, KNTC1, PKMYT1, ANLN, KIF2C, CDCA8, NCAPH, NCAPG2, FBXO5, CCNA1, CDCA5, ASPM, CDCA3, KIF11, DLGAP5, KIF15, CCNF, KIF18A, CENPF, NDC80, CDC20, PBK, UBE2C, CDK2, NCAPD2, CCNB1, CCNB2, RCC2, BUB1B	778	229	13528	2.202	0.314579	0.046118	0.227674
GOTERM_BP_FAT	GO:0007167~enzyme linked receptor protein signaling pathway	38	3.54478	0.000152915	CER1, FGFR2, WFIKKN2, NRP1, LTBP2, ERBB2, PML, FOXO1, TGFB2, MSX2, SOS1, GAB1, EGF, INSR, CHRNA3, EGFR, PTPRK, IRS2, PTPRE, PTPRF, PTPRG, ARID5B, FLT4, CBL, ALK, IRS1, EPHA1, EPHA2, NTRK3, EPHA4, MSX1, PRLR, HIPK2, SPTBN1, JAK3, GDF15, BMP7, GRB7	778	342	13528	1.93202	0.366204	0.0494075	0.274808
GOTERM_BP_FAT	GO:0006814~sodium ion transport	20	1.86567	0.000154093	SLC5A5, ATP1B1, SGK1, SLC13A5, SLC12A2, SLC12A4, SLC24A5, SLC38A11, SLC10A5, SLC4A10, SLC24A4, SLC23A2, SLC17A1, SCN9A, SLC13A1, SLC5A6, SLC13A4, SCNN1A, SCN5A, SLC4A5	778	130	13528	2.6751	0.368427	0.0449143	0.276923
GOTERM_BP_FAT	GO:0051301~cell division	34	3.17164	0.000187046	KIFC1, DIAPH2, KNTC1, ANLN, ZBTB16, TGFB2, LLGL2, CDCA8, NCAPH, NCAPG2, FBXO5, CCNA1, CDCA5, CABLES1, ASPM, CDCA3, KIF11, NOX5, STX2, CCNF, CENPF, BRCA2, CDK6, CDC20, NDC80, UBE2C, CDK2, NCAPD2, CCNB1, CCNB3, CCNB2, RCC2, BUB1B, CDCA7L	778	295	13528	2.00406	0.427546	0.0494468	0.336048
GOTERM_BP_FAT	GO:0045893~positive regulation of transcription, DNA-dependent	48	4.47761	0.000203932	E2F1, GLIS3, GRIP1, MITF, FOXO1, AFAP1L2, EHF, PRDM16, SOX9, TCF7L2, SOX8, ZIC3, GATA6, MDFIC, NFAT5, MKL2, ALX4, NKX2-2, ALX1, PLAGL2, ATF7IP, BMP3, IL6, KLF12, EPAS1, CREBBP, MAML2, ESRRG, TEAD1, TEAD2, CREB5, TEAD3, SIX4, KLF15, ISL1, PROX1, PPARGC1A, TP73, ASCL1, EP300, HNF4A, ETS2, HIPK2, NCOA6, ZFPM2, JAK3, BMP7, NFIB	778	477	13528	1.74975	0.455664	0.0494194	0.366334
GOTERM_BP_FAT	GO:0051254~positive regulation of RNA metabolic process	48	4.47761	0.000250326	E2F1, GLIS3, GRIP1, MITF, FOXO1, AFAP1L2, EHF, PRDM16, SOX9, TCF7L2, SOX8, ZIC3, GATA6, MDFIC, NFAT5, MKL2, ALX4, NKX2-2, ALX1, PLAGL2, ATF7IP, BMP3, IL6, KLF12, EPAS1, CREBBP, MAML2, ESRRG, TEAD1, TEAD2, CREB5, TEAD3, SIX4, KLF15, ISL1, PROX1, PPARGC1A, TP73, ASCL1, EP300, HNF4A, ETS2, HIPK2, NCOA6, ZFPM2, JAK3, BMP7, NFIB	778	481	13528	1.7352	0.526009	0.0558103	0.449497
GOTERM_BP_FAT	GO:0000279~M phase	36	3.35821	0.000317571	KIFC1, KNTC1, PKMYT1, ANLN, KIF2C, CDCA8, NCAPH, NCAPG2, FBXO5, PIWIL2, CCNA1, CDCA5, ASPM, CDCA3, EXO1, KIF11, MKI67, DLGAP5, KIF15, CCNF, KIF18A, CENPF, BRCA2, CDC20, NDC80, PBK, UBE2C, RAD54L, CDK2, TACC2, NCAPD2, CCNB1, CCNB3, CCNB2, RCC2, BUB1B	778	329	13528	1.90266	0.612154	0.0654157	0.569919
GOTERM_BP_FAT	GO:0010557~positive regulation of macromolecule biosynthetic process	60	5.59701	0.000360939	E2F1, GRIP1, MITF, FOXO1, PAWR, ZIC3, TGFB2, GATA6, MDFIC, PIWIL2, MKL2, ALX4, MKL1, INSR, ALX1, ATF7IP, IRS2, BARHL2, SIX4, PROX1, IRS1, PPARGC1A, CDK2, PRKCQ, ASCL1, EP300, HNF4A, HIPK2, NCOA6, ZFPM2, GLIS3, AFAP1L2, EHF, PRDM16, SOX9, TCF7L2, SOX8, NFAT5, NKX2-2, PLAGL2, KLF5, BMP3, IL6, EPAS1, KLF12, MAML2, CREBBP, ESRRG, TEAD1, ITGA2, CREB5, TEAD2, KLF15, TEAD3, ISL1, TP73, ETS2, JAK3, BMP7,…	778	654	13528	1.59525	0.659219	0.0692529	0.64751
GOTERM_BP_FAT	GO:0007155~cell adhesion	63	5.87687	0.000413381	NRP1, CLSTN2, NELL2, EDIL3, LOXL2, ALX1, DSCAM, EGFR, PTPRK, PTPRF, PCDHB6, F8, CPXM2, PCDH8, CLDN1, CLDN2, LAMC2, ADAM12, PARVA, OLFM4, EMCN, GNE, PCDHB15, ITGB3, CDH3, SOX9, FAT4, TNR, TRO, FAT1, FAT2, PKD2, ACAN, EMB, COL8A1, LAMB1, COL8A2, THBS4, MAG, HAPLN3, LPP, LRRN2, COL15A1, ITGA2, EFS, CELSR2, PCDH15, NID2, ECM2, PCDH19, ITGA9, OMD, LYVE1, DSG2, CDH16, FREM2, PKP2, ITGA8, FREM1, DSC3, A…	778	700	13528	1.56494	0.70857	0.0741655	0.741257
GOTERM_BP_FAT	GO:0022610~biological adhesion	63	5.87687	0.000429684	NRP1, CLSTN2, NELL2, EDIL3, LOXL2, ALX1, DSCAM, EGFR, PTPRK, PTPRF, PCDHB6, F8, CPXM2, PCDH8, CLDN1, CLDN2, LAMC2, ADAM12, PARVA, OLFM4, EMCN, GNE, PCDHB15, ITGB3, CDH3, SOX9, FAT4, TNR, TRO, FAT1, FAT2, PKD2, ACAN, EMB, COL8A1, LAMB1, COL8A2, THBS4, MAG, HAPLN3, LPP, LRRN2, COL15A1, ITGA2, EFS, CELSR2, PCDH15, NID2, ECM2, PCDH19, ITGA9, OMD, LYVE1, DSG2, CDH16, FREM2, PKP2, ITGA8, FREM1, DSC3, A…	778	701	13528	1.5627	0.722405	0.0726162	0.770385
GOTERM_BP_FAT	GO:0007346~regulation of mitotic cell cycle	21	1.95896	0.000437596	EGFR, DLGAP5, PML, KNTC1, CENPF, PKMYT1, BRCA2, RPS27L, AFAP1L2, ANLN, TRRAP, UBE2C, PROX1, CDK2, PRKCQ, HNF4A, MTBP, BUB1B, FBXO5, EGF, INSR	778	152	13528	2.40231	0.728881	0.0699444	0.784518
GOTERM_BP_FAT	GO:0022402~cell cycle process	53	4.94403	0.000505311	E2F1, GAS2L3, KIFC1, KNTC1, PKMYT1, TGFB2, KIF2C, CDCA8, MTBP, PIWIL2, CCNA1, CDCA5, ASPM, CDCA3, EGFR, KIF11, POLE, CCNF, KIF15, CDK6, PBK, UBE2C, CDK2, TACC2, NCAPD2, RCC2, BUB1B, BCAT1, PML, ANLN, TCF7L2, NCAPH, NCAPG2, PKD2, FBXO5, NFATC1, EXO1, MKI67, CEP135, DLGAP5, KIF18A, CENPF, BRCA2, NDC80, CDC20, RAD54L, TP73, CCNB1, NOTCH2, CCNB3, CDKN1A, CCNB2, GAS2L2	778	565	13528	1.6311	0.778475	0.0762625	0.905397
GOTERM_BP_FAT	GO:0009891~positive regulation of biosynthetic process	62	5.78358	0.000588221	E2F1, GRIP1, MITF, FOXO1, PAWR, ZIC3, TGFB2, GATA6, MDFIC, PIWIL2, MKL2, ALX4, MKL1, INSR, ALX1, ATF7IP, EGFR, IRS2, BARHL2, SIX4, PROX1, IRS1, PPARGC1A, CDK2, ASCL1, PRKCQ, EP300, HNF4A, HIPK2, NCOA6, NPPC, ZFPM2, GLIS3, AFAP1L2, EHF, PRDM16, SOX9, TCF7L2, SOX8, NFAT5, NKX2-2, PLAGL2, KLF5, BMP3, IL6, EPAS1, KLF12, MAML2, CREBBP, ESRRG, ITGA2, TEAD1, CREB5, TEAD2, KLF15, TEAD3, ISL1, TP73, ETS2,…	778	695	13528	1.55118	0.827022	0.0839914	1.05321
GOTERM_BP_FAT	GO:0031328~positive regulation of cellular biosynthetic process	61	5.6903	0.000694358	E2F1, GRIP1, MITF, FOXO1, PAWR, ZIC3, GATA6, MDFIC, PIWIL2, MKL2, ALX4, MKL1, INSR, ALX1, ATF7IP, EGFR, IRS2, BARHL2, SIX4, PROX1, IRS1, PPARGC1A, CDK2, PRKCQ, ASCL1, EP300, HNF4A, HIPK2, NCOA6, NPPC, ZFPM2, GLIS3, AFAP1L2, EHF, PRDM16, SOX9, TCF7L2, SOX8, NFAT5, NKX2-2, PLAGL2, KLF5, BMP3, IL6, EPAS1, KLF12, MAML2, CREBBP, ESRRG, TEAD1, ITGA2, CREB5, TEAD2, KLF15, TEAD3, ISL1, TP73, ETS2, JAK3, …	778	685	13528	1.54844	0.873978	0.093925	1.24213
GOTERM_BP_FAT	GO:0007018~microtubule-based movement	17	1.58582	0.000712475	KIF14, DNAH11, KIFC1, DNAH9, KIF11, KIF24, KIF27, KIF15, DNAH3, KIF18A, DNAH1, DNAH2, DNAH5, KIF2C, KIF19, DYNLRB2, KIF20A	778	113	13528	2.61592	0.88061	0.0920874	1.27434
GOTERM_BP_FAT	GO:0015672~monovalent inorganic cation transport	34	3.17164	0.000725417	KCNMB4, KCNC1, ATP1B1, SLC5A5, KCNC3, SLC13A5, SLC38A11, KCNA5, HVCN1, KCNJ13, KCNQ4, SLC24A4, SLC23A2, SCN9A, SCN5A, SCNN1A, SLC4A5, SGK1, SLC12A2, SLC12A4, SLC24A5, SLC10A5, CDK2, SLC4A10, KCNT2, SLC17A1, KCNN2, SLC13A1, KCNF1, KCNH8, SLC5A6, SLC13A4, KCTD16, KCNH3	778	318	13528	1.85911	0.885133	0.0897956	1.29735
GOTERM_BP_FAT	GO:0001558~regulation of cell growth	24	2.23881	0.000761606	NRP1, ENPP1, FGFRL1, BARHL2, PML, OSGIN1, CISH, TP73, TGFB2, NTRK3, NOV, AGTR1, PRKCQ, DAB2, CTH, CDKN1A, FAM107A, EP300, HNF4A, TRO, TNK1, SEMA3A, IGFBP2, NET1	778	194	13528	2.15111	0.896892	0.090323	1.36165
GOTERM_BP_FAT	GO:0010628~positive regulation of gene expression	53	4.94403	0.000964844	E2F1, GRIP1, MITF, FOXO1, ZIC3, GATA6, MDFIC, MKL2, ALX4, MKL1, ALX1, ATF7IP, SIX4, PPARGC1A, PROX1, CDK2, ASCL1, EP300, HNF4A, HIPK2, NCOA6, ZFPM2, GLIS3, EHF, AFAP1L2, SOX9, PRDM16, TCF7L2, SOX8, NFAT5, DNMT3B, NKX2-2, PLAGL2, KLF5, BMP3, IL2RB, IL6, KLF12, EPAS1, MAML2, CREBBP, ESRRG, TEAD1, TEAD2, CREB5, TEAD3, KLF15, ISL1, TP73, ETS2, JAK3, BMP7, NFIB	778	581	13528	1.58618	0.943784	0.108761	1.72204
GOTERM_BP_FAT	GO:0009612~response to mechanical stimulus	11	1.02612	0.00118154	ATP2B2, SLC12A2, GRIN2B, PKD2, ITGA2, TRPV4, DNAH1, STRBP, IGFBP2, TIMP3, CHRNA10	778	56	13528	3.41553	0.970561	0.126802	2.10493
GOTERM_BP_FAT	GO:0030030~cell projection organization	37	3.45149	0.00124598	DCC, FGD1, DNAH9, NRP1, ERBB2, MYO7A, WASF2, ATP2B2, TNR, DMD, TEKT2, SEMA3A, LAMB1, THBS4, DSCAM, KLF5, EGFR, DNM3, IL6, C2CD3, STX2, BAIAP2L1, FOXJ1, DPYSL5, CELSR2, ISL1, DNAI2, ATP7A, EPHA4, SLITRK4, SPAG6, ITGA8, CLIC5, CC2D2A, TSGA10, EFNA5, BMP7	778	368	13528	1.74827	0.975713	0.128637	2.21851
GOTERM_BP_FAT	GO:0000278~mitotic cell cycle	37	3.45149	0.00135987	BCAT1, E2F1, KIFC1, KNTC1, PKMYT1, ANLN, KIF2C, NCAPH, CDCA8, NCAPG2, MTBP, FBXO5, CCNA1, CDCA5, ASPM, CDCA3, NFATC1, EGFR, KIF11, DLGAP5, POLE, KIF15, CCNF, KIF18A, CENPF, CDK6, CDC20, NDC80, PBK, UBE2C, CDK2, NCAPD2, CCNB1, CDKN1A, CCNB2, RCC2, BUB1B	778	370	13528	1.73882	0.982715	0.134912	2.41897
GOTERM_BP_FAT	GO:0007507~heart development	25	2.33209	0.00138186	NRP1, C2CD3, TNNC1, ERBB2, FBN1, TEAD1, MYH7, ISL1, SOX9, PROX1, ZIC3, GJC1, TGFB2, MSX2, EP300, MSX1, PKP2, GATA6, NCOA6, PKD2, ZFPM2, MKL2, INSR, CHRNA3, NFATC1	778	215	13528	2.02188	0.983813	0.132545	2.45762
GOTERM_BP_FAT	GO:0006820~anion transport	19	1.77239	0.00139448	FXYD1, SLC5A5, SLC13A5, ENPP1, SLC12A2, SLC12A4, SLC22A8, SLC4A10, SLC16A5, SLCO1A2, CLIC5, SLC17A1, CLIC6, SLC13A1, SLC4A2, SLC13A4, OCA2, MPST, SLC4A5	778	143	13528	2.31032	0.984412	0.129518	2.4798
GOTERM_BP_FAT	GO:0045941~positive regulation of transcription	51	4.75746	0.00145112	E2F1, GRIP1, MITF, FOXO1, ZIC3, GATA6, MDFIC, MKL2, ALX4, MKL1, ALX1, ATF7IP, SIX4, PPARGC1A, PROX1, CDK2, ASCL1, EP300, HNF4A, HIPK2, NCOA6, ZFPM2, GLIS3, EHF, AFAP1L2, SOX9, PRDM16, TCF7L2, SOX8, NFAT5, NKX2-2, PLAGL2, KLF5, BMP3, IL6, KLF12, EPAS1, MAML2, CREBBP, ESRRG, TEAD1, TEAD2, CREB5, TEAD3, KLF15, ISL1, TP73, ETS2, JAK3, BMP7, NFIB	778	564	13528	1.57233	0.986838	0.130372	2.57929
GOTERM_BP_FAT	GO:0050982~detection of mechanical stimulus	6	0.559701	0.00158405	ATP2B2, SLC12A2, GRIN2B, PKD2, ITGA2, CHRNA10	778	16	13528	6.52057	0.99115	0.137336	2.8124
GOTERM_BP_FAT	GO:0051180~vitamin transport	7	0.652985	0.00194161	CPT2, CUBN, FOLR2, SLC23A2, FOLR1, SLC5A6, SLC19A1	778	24	13528	5.07155	0.996959	0.161064	3.43681
GOTERM_BP_FAT	GO:0010604~positive regulation of macromolecule metabolic process	70	6.52985	0.00256481	E2F1, GRIP1, MITF, FOXO1, PAWR, ZIC3, TGFB2, AGTR1, GATA6, MDFIC, PIWIL2, MKL2, ALX4, MKL1, INSR, ALX1, ATF7IP, IRS2, BARHL2, PRKCG, SIX4, UBE2C, PROX1, IRS1, PPARGC1A, CDK2, ASCL1, PRKCQ, EP300, HNF4A, HIPK2, NCOA6, ZFPM2, GLIS3, PML, AFAP1L2, EHF, PRDM16, SOX9, TCF7L2, SOX8, NFAT5, FBXO5, DNMT3B, NKX2-2, PLAGL2, KLF5, BMP3, IL2RB, IL6, EPAS1, KLF12, MAML2, CREBBP, ESRRG, ITGA2, TEAD1, CDC20, CR…	778	857	13528	1.42027	0.999528	0.201674	4.51607
GOTERM_BP_FAT	GO:0045944~positive regulation of transcription from RNA polymerase II promoter	36	3.35821	0.00268117	E2F1, GLIS3, MITF, FOXO1, SOX9, TCF7L2, SOX8, ZIC3, GATA6, NFAT5, MKL2, ALX4, NKX2-2, ALX1, PLAGL2, BMP3, IL6, KLF12, EPAS1, CREBBP, MAML2, TEAD1, TEAD2, TEAD3, SIX4, ISL1, PPARGC1A, ASCL1, EP300, HNF4A, HIPK2, NCOA6, ZFPM2, JAK3, BMP7, NFIB	778	371	13528	1.68726	0.999667	0.204466	4.71631
GOTERM_BP_FAT	GO:0045935~positive regulation of nucleobase, nucleoside, nucleotide and nucleic acid metabolic process	54	5.03731	0.0027143	E2F1, GRIP1, MITF, FOXO1, ZIC3, GATA6, MDFIC, MKL2, ALX4, MKL1, INSR, ALX1, ATF7IP, PRKCG, SIX4, PPARGC1A, PROX1, CDK2, ASCL1, EP300, HNF4A, HIPK2, NCOA6, NPPC, ZFPM2, GLIS3, AFAP1L2, EHF, SOX9, PRDM16, TCF7L2, SOX8, NFAT5, NKX2-2, PLAGL2, KLF5, BMP3, IL6, KLF12, EPAS1, MAML2, CREBBP, ESRRG, TEAD1, TEAD2, CREB5, TEAD3, KLF15, ISL1, TP73, ETS2, JAK3, BMP7, NFIB	778	624	13528	1.50475	0.999698	0.201596	4.77326
GOTERM_BP_FAT	GO:0048066~pigmentation during development	7	0.652985	0.00301077	DCT, TYRP1, TYR, MITF, OCA2, ZIC2, RAB27A	778	26	13528	4.68143	0.999876	0.215743	5.28138
GOTERM_BP_FAT	GO:0051173~positive regulation of nitrogen compound metabolic process	55	5.1306	0.00323938	E2F1, GRIP1, MITF, FOXO1, ZIC3, GATA6, MDFIC, MKL2, ALX4, MKL1, INSR, ALX1, EGFR, ATF7IP, PRKCG, SIX4, PPARGC1A, PROX1, CDK2, ASCL1, EP300, HNF4A, HIPK2, NCOA6, NPPC, ZFPM2, GLIS3, AFAP1L2, EHF, SOX9, PRDM16, TCF7L2, SOX8, NFAT5, NKX2-2, PLAGL2, KLF5, BMP3, IL6, EPAS1, KLF12, MAML2, CREBBP, ESRRG, TEAD1, CREB5, TEAD2, KLF15, TEAD3, ISL1, TP73, ETS2, JAK3, BMP7, NFIB	778	644	13528	1.48501	0.999937	0.224788	5.67144
GOTERM_BP_FAT	GO:0007156~homophilic cell adhesion	17	1.58582	0.00341075	CLSTN2, PTPRF, PCDHB6, PCDHB15, PCDH15, CELSR2, PCDH8, CDH3, PCDH19, CDH16, DSG2, FAT4, FREM2, TRO, FAT1, FAT2, DSC3	778	131	13528	2.25648	0.999962	0.229901	5.96284
GOTERM_BP_FAT	GO:0008361~regulation of cell size	23	2.14552	0.00371008	FGFR2, NRP1, ENOX2, ENPP1, PML, OSGIN1, TP73, TGFB2, NTRK3, ATP2B2, NOTCH2, DAB2, CDKN1A, CTH, EP300, NUPR1, HNF4A, TRO, TMEM123, TNK1, SEMA3A, ODF3B, EMP1	778	206	13528	1.9414	0.999985	0.242022	6.46981
GOTERM_BP_FAT	GO:0040008~regulation of growth	33	3.07836	0.00430819	ENOX2, NRP1, ENPP1, NELL2, FGFRL1, PML, OSGIN1, TGFB2, ACVR1C, NOV, AGTR1, DAB2, FAM107A, TRO, SEMA3A, INSR, NET1, BARHL2, NPY1R, PROX1, CISH, GAS6, TP73, NTRK3, PRKCQ, CTH, CDKN1A, EP300, HNF4A, DIO3, NPPC, TNK1, IGFBP2	778	341	13528	1.68273	0.999997	0.269495	7.47506
GOTERM_BP_FAT	GO:0042472~inner ear morphogenesis	10	0.932836	0.0043233	ATP2B2, KCNQ4, CLIC5, ITGA8, OTX1, MYO7A, SIX4, PROX1, CHRNA10, PTPRQ	778	56	13528	3.10503	0.999998	0.264805	7.50032
GOTERM_BP_FAT	GO:0050974~detection of mechanical stimulus involved in sensory perception	5	0.466418	0.00508667	ATP2B2, SLC12A2, GRIN2B, ITGA2, CHRNA10	778	13	13528	6.68776	1	0.297883	8.76818
GOTERM_BP_FAT	GO:0007017~microtubule-based process	26	2.42537	0.00575967	DNAH11, KIFC1, DNAH9, KIF24, KIF27, DNAH3, DNAH1, DNAH2, DNAH5, KIF2C, TEKT1, TEKT2, FBXO5, KIF14, KIF11, CEP135, KIF15, KIF18A, BRCA2, NDC80, UBE2C, TACC2, BUB1B, KIF19, DYNLRB2, KIF20A	778	253	13528	1.78693	1	0.323942	9.87233
GOTERM_BP_FAT	GO:0043255~regulation of carbohydrate biosynthetic process	6	0.559701	0.00581082	IRS2, HNF4A, ENPP1, INSR, PPARGC1A, IRS1	778	21	13528	4.96805	1	0.320357	9.95574
GOTERM_BP_FAT	GO:0030308~negative regulation of cell growth	13	1.21269	0.00624776	NRP1, ENPP1, PML, OSGIN1, TP73, TGFB2, CTH, CDKN1A, DAB2, HNF4A, TRO, TNK1, SEMA3A	778	92	13528	2.45702	1	0.333882	10.6652
GOTERM_BP_FAT	GO:0070482~response to oxygen levels	17	1.58582	0.00698837	ATP1B1, NOS1, EPAS1, CREBBP, PML, ITGA2, KCNA5, MMP2, TGFB2, SLC11A2, PRKCQ, CDKN1A, EP300, HIF3A, NPPC, HSD11B2, DPP4	778	141	13528	2.09645	1	0.359141	11.8557
GOTERM_BP_FAT	GO:0007049~cell cycle	62	5.78358	0.00754876	GAS2L3, E2F1, KIFC1, E2F7, KNTC1, PKMYT1, TGFB2, KIF2C, CDCA8, MTBP, PIWIL2, CCNA1, CDCA5, CABLES1, ASPM, CDCA3, EGFR, KIF11, POLE, CCNF, KIF15, CDK6, PBK, UBE2C, CDK2, TACC2, NCAPD2, UHRF1, EP300, KRT18, RCC2, MAPK4, BUB1B, BCAT1, PML, ANLN, TCF7L2, LLGL2, NCAPH, NCAPG2, PKD2, TFDP2, FBXO5, NFATC1, EXO1, CKAP2, MKI67, CEP135, DLGAP5, KIF18A, CENPF, BRCA2, CDC20, NDC80, RAD54L, TP73, CCNB1, NOTCH…	778	776	13528	1.38926	1	0.375464	12.7465
GOTERM_BP_FAT	GO:0055085~transmembrane transport	48	4.47761	0.00762867	SLC2A12, KCNC1, SLC2A13, SLC5A5, CPT2, KCNC3, SLC13A5, AQP9, SLC39A12, SLC16A12, KCNA5, SLC19A1, AQP1, SLC11A2, TRAM2, KCNQ4, FOLR2, SLC24A4, FOLR1, SLC23A2, SLC30A1, SCN9A, TRPV4, SCN5A, SLC22A2, OCA2, SLC39A2, CUBN, SLC12A2, SLC12A4, SLC22A8, TRPC7, SLC24A5, ATP7A, SLC16A5, SLC16A6, SLC17A1, SLC16A9, SLC37A2, ATP2A1, SLC13A1, ABCC4, KCNF1, SLC5A6, KCNH8, SLC13A4, SLC30A10, KCNH3	778	569	13528	1.46684	1	0.372517	12.8729
GOTERM_BP_FAT	GO:0042438~melanin biosynthetic process	4	0.373134	0.00850129	DCT, TYRP1, TYR, OCA2	778	8	13528	8.69409	1	0.399014	14.2412
GOTERM_BP_FAT	GO:0003007~heart morphogenesis	11	1.02612	0.00859062	MSX2, MSX1, C2CD3, TNNC1, MYH7, MKL2, ISL1, PROX1, INSR, ZIC3, TGFB2	778	73	13528	2.62014	1	0.396174	14.3802
GOTERM_BP_FAT	GO:0042771~DNA damage response, signal transduction by p53 class mediator resulting in induction of apoptosis	5	0.466418	0.00885945	NUPR1, HIPK2, PML, BRCA2, RPS27L	778	15	13528	5.79606	1	0.399696	14.797
GOTERM_BP_FAT	GO:0051726~regulation of cell cycle	31	2.89179	0.00904442	E2F1, KNTC1, PML, PKMYT1, RPS27L, AFAP1L2, ANLN, TRRAP, TGFB2, MTBP, FBXO5, EGF, INSR, CABLES1, EGFR, PTPRK, DLGAP5, HERC5, CENPF, BRCA2, CDK6, PDE3A, UBE2C, PROX1, CDK2, CCNB1, PRKCQ, CDKN1A, HNF4A, BUB1B, BMP7	778	331	13528	1.6285	1	0.40022	15.0827
GOTERM_BP_FAT	GO:0016337~cell-cell adhesion	27	2.51866	0.0090514	EMCN, CLSTN2, PCDHB15, CDH3, SOX9, FAT4, FAT1, TRO, FAT2, ACAN, COL8A2, ALX1, EGFR, PTPRF, PCDHB6, PCDH15, CELSR2, PCDH8, PCDH19, CDH16, DSG2, PKP2, FREM2, ITGA8, CLDN1, DSC3, CLDN2	778	276	13528	1.70102	1	0.39475	15.0934
GOTERM_BP_FAT	GO:0007169~transmembrane receptor protein tyrosine kinase signaling pathway	23	2.14552	0.00980879	EGFR, FGFR2, IRS2, NRP1, PTPRG, FLT4, ARID5B, ERBB2, CBL, FOXO1, ALK, EPHA1, IRS1, EPHA2, NTRK3, EPHA4, PRLR, SOS1, GAB1, EGF, GRB7, INSR, CHRNA3	778	224	13528	1.78539	1	0.414003	16.2536
GOTERM_BP_FAT	GO:0001666~response to hypoxia	16	1.49254	0.00996973	ATP1B1, NOS1, EPAS1, CREBBP, PML, ITGA2, KCNA5, MMP2, TGFB2, SLC11A2, PRKCQ, EP300, HIF3A, NPPC, HSD11B2, DPP4	778	134	13528	2.0762	1	0.413482	16.4982
GOTERM_BP_FAT	GO:0006813~potassium ion transport	18	1.6791	0.0104944	KCNC1, KCNMB4, ATP1B1, KCNC3, SLC12A2, SLC12A4, SLC24A5, KCNA5, CDK2, KCNJ13, KCNQ4, KCNT2, SLC24A4, KCNN2, KCNF1, KCNH8, KCTD16, KCNH3	778	160	13528	1.95617	1	0.424158	17.2909
GOTERM_BP_FAT	GO:0006164~purine nucleotide biosynthetic process	17	1.58582	0.0109465	ATP1B1, ATP10B, ADCY6, ATP11A, AK5, AMPD3, ATP13A5, ATP13A4, ATP7A, ATP2B2, ATP2B3, ADCY9, ATP2A1, NPPC, ATP8B2, NT5E, ATP8B4	778	148	13528	1.99729	1	0.432153	17.9683
GOTERM_BP_FAT	GO:0045792~negative regulation of cell size	13	1.21269	0.0110673	NRP1, ENPP1, PML, OSGIN1, TP73, TGFB2, CTH, CDKN1A, DAB2, HNF4A, TRO, TNK1, SEMA3A	778	99	13528	2.2833	1	0.430209	18.1484
GOTERM_BP_FAT	GO:0016054~organic acid catabolic process	14	1.30597	0.0110681	BCAT1, ACOX2, ACOX1, NOS1, CPT2, AASS, PAH, AFMID, ACADVL, MCCC2, CEL, ASPA, CYP39A1, GAD1	778	111	13528	2.1931	1	0.424864	18.1496
GOTERM_BP_FAT	GO:0046395~carboxylic acid catabolic process	14	1.30597	0.0110681	BCAT1, ACOX2, ACOX1, NOS1, CPT2, AASS, PAH, AFMID, ACADVL, MCCC2, CEL, ASPA, CYP39A1, GAD1	778	111	13528	2.1931	1	0.424864	18.1496
GOTERM_BP_FAT	GO:0007389~pattern specification process	26	2.42537	0.0111207	DNAH11, CER1, NRP1, ZBTB16, ZIC3, DISP1, SOSTDC1, RAB23, PKD2, ALX4, ALX1, C2CD3, FOXJ1, OTX1, DLL3, CELSR2, PCDH8, NOTCH2, ASCL1, EP300, SFRP1, HIPK2, LRP6, RFX3, BMP7, LRP5	778	267	13528	1.69323	1	0.421134	18.2279
GOTERM_BP_FAT	GO:0006582~melanin metabolic process	4	0.373134	0.0122128	DCT, TYRP1, TYR, OCA2	778	9	13528	7.72808	1	0.446234	19.8378
GOTERM_BP_FAT	GO:0042471~ear morphogenesis	10	0.932836	0.0127111	ATP2B2, KCNQ4, CLIC5, ITGA8, OTX1, MYO7A, SIX4, PROX1, CHRNA10, PTPRQ	778	66	13528	2.63457	1	0.454207	20.5624
GOTERM_BP_FAT	GO:0032535~regulation of cellular component size	26	2.42537	0.0132245	FGFR2, NRP1, ENOX2, ENPP1, ELN, PML, OSGIN1, TGFB2, ATP2B2, DAB2, TRO, TMEM123, SEMA3A, TP73, NTRK3, NOTCH2, CDKN1A, CTH, EP300, HNF4A, NUPR1, SPTBN2, SPTBN1, TNK1, ODF3B, EMP1	778	271	13528	1.66824	1	0.462212	21.3025
GOTERM_BP_FAT	GO:0000902~cell morphogenesis	32	2.98507	0.013624	DCC, NRP1, ERBB2, MYO7A, SOX9, TGFB2, ATP2B2, DAB2, CRB1, TNR, DMD, SEMA3A, LAMB1, NFATC1, DSCAM, EGFR, C2CD3, FOXJ1, DPYSL5, NDC80, CELSR2, DNAI2, ISL1, PROX1, ATP7A, SFRP5, EPHA4, SLITRK4, CLIC5, EFNA5, ANTXR1, BMP7	778	356	13528	1.56298	1	0.467047	21.8737
GOTERM_BP_FAT	GO:0010564~regulation of cell cycle process	14	1.30597	0.0136614	DLGAP5, PML, KNTC1, CENPF, PKMYT1, BRCA2, ANLN, PDE3A, UBE2C, PROX1, PRKCQ, FBXO5, EGF, INSR	778	114	13528	2.13539	1	0.462863	21.9271
GOTERM_BP_FAT	GO:0010906~regulation of glucose metabolic process	7	0.652985	0.013693	IRS2, HNF4A, ENPP1, PFKFB1, INSR, PPARGC1A, IRS1	778	35	13528	3.47763	1	0.45863	21.9721
GOTERM_BP_FAT	GO:0050767~regulation of neurogenesis	18	1.6791	0.0147655	MAG, ZNF488, NRP1, PTPRF, PLXNB2, BARHL2, DLL3, ISL1, TIMP2, NTRK3, ASCL1, TGIF2, SEMA3A, BMP7, DNMT3B, NKX2-2, ASPM, CHRNA3	778	166	13528	1.88546	1	0.479173	23.4848
GOTERM_BP_FAT	GO:0000070~mitotic sister chromatid segregation	7	0.652985	0.0156557	KIFC1, NCAPH, DLGAP5, KIF18A, NDC80, CDCA5, NCAPD2	778	36	13528	3.38103	1	0.49437	24.7194
GOTERM_BP_FAT	GO:0055114~oxidation reduction	51	4.75746	0.0159309	ACOX2, ACOX1, PXDN, CYB5R1, ENOX2, LDHD, PDIA5, TYR, CYP39A1, P4HA2, P4HA3, PIWIL2, TPO, LOXL2, LOXL1, ND1, MDH1B, AIFM3, ND4, ND5, ND2, COX4I2, F8, PPARGC1A, DHRS7C, POR, ACADVL, CYP27A1, RRM2, HSD11B2, STEAP1, XDH, TYRP1, ADHFE1, CYTB, AASS, PAH, ALDH3A2, FMO4, FMO1, BDH1, CHDH, NOS1, NOX5, TBXAS1, CYP4B1, MSRB3, VAT1L, ND4L, RDH10, DIO3, BLVRB	778	639	13528	1.38779	1	0.495467	25.0973
GOTERM_BP_FAT	GO:0051640~organelle localization	12	1.1194	0.016107	DLGAP5, MYO7A, ATP2A1, KIF18A, SYNJ2, CENPF, NDC80, CDCA5, WIPI1, ASPM, RAB27A, TACC2	778	92	13528	2.26802	1	0.494395	25.338
GOTERM_BP_FAT	GO:0008285~negative regulation of cell proliferation	32	2.98507	0.0165458	CER1, ERBB2, E2F7, FGFRL1, PML, ZBTB16, IL15, PAWR, TIMP2, TGFB2, TRIB1, MSX2, KRT5, MTBP, DLG3, PTPRK, HYAL1, IL6, PTPRF, FOXJ1, BRCA2, CDK6, PROX1, NOTCH2, CDKN1A, CTH, MSX1, NUPR1, HNF4A, NPPC, BMP7, NFIB	778	361	13528	1.54133	1	0.498927	25.9349
GOTERM_BP_FAT	GO:0046034~ATP metabolic process	13	1.21269	0.0171328	ATP7A, ATP2B2, ATP2B3, ATP1B1, ATP10B, ATP2A1, ATP8B2, ATP11A, MYH7, AK5, ATP13A5, ATP8B4, ATP13A4	778	105	13528	2.15282	1	0.506349	26.7264
GOTERM_BP_FAT	GO:0015698~inorganic anion transport	12	1.1194	0.0173542	FXYD1, SLC4A10, SLC5A5, SLC12A2, ENPP1, SLC17A1, CLIC5, SLC12A4, CLIC6, SLC13A1, SLC13A4, MPST	778	93	13528	2.24364	1	0.506121	27.0228
GOTERM_BP_FAT	GO:0000819~sister chromatid segregation	7	0.652985	0.0178047	KIFC1, NCAPH, DLGAP5, KIF18A, NDC80, CDCA5, NCAPD2	778	37	13528	3.28965	1	0.510461	27.6225
GOTERM_BP_FAT	GO:0043473~pigmentation	9	0.839552	0.0188905	DCT, ATP7A, TYRP1, TYR, MYO7A, MITF, OCA2, ZIC2, RAB27A	778	59	13528	2.65243	1	0.526826	29.0489
GOTERM_BP_FAT	GO:0007517~muscle organ development	21	1.95896	0.0190516	EVC, TNNC1, ARID5B, ERBB2, ELN, CENPF, MYH7, SIX4, PROX1, TGFB2, GJC1, CXCL10, EP300, MSX1, GATA6, DMD, ZFPM2, MKX, MKL2, ALX4, JPH1	778	211	13528	1.73058	1	0.525235	29.2583
GOTERM_BP_FAT	GO:0000041~transition metal ion transport	10	0.932836	0.0198716	SLC11A2, ATP7A, SLC30A1, SLC39A12, TRPC7, HFE, SLC30A10, SLC31A1, STEAP1, SLC39A2	778	71	13528	2.44904	1	0.535761	30.3148
GOTERM_BP_FAT	GO:0048477~oogenesis	7	0.652985	0.0201474	CCNB1, DIAPH2, PIWIL2, BRCA2, FBXO5, PDE3A, PAQR5	778	38	13528	3.20308	1	0.536184	30.6669
GOTERM_BP_FAT	GO:0010675~regulation of cellular carbohydrate metabolic process	7	0.652985	0.0201474	IRS2, HNF4A, ENPP1, PFKFB1, INSR, PPARGC1A, IRS1	778	38	13528	3.20308	1	0.536184	30.6669
GOTERM_BP_FAT	GO:0046320~regulation of fatty acid oxidation	6	0.559701	0.0201518	IRS2, CPT2, CAB39L, PRKAA2, PPARGC1A, IRS1	778	28	13528	3.72604	1	0.531786	30.6725
GOTERM_BP_FAT	GO:0030031~cell projection assembly	11	1.02612	0.0201928	KLF5, DNM3, FGD1, C2CD3, STX2, BAIAP2L1, FOXJ1, WASF2, TSGA10, DNAI2, THBS4	778	83	13528	2.30446	1	0.528107	30.7247
GOTERM_BP_FAT	GO:0048568~embryonic organ development	18	1.6791	0.020285	EPAS1, MYO7A, OTX1, SIX4, PROX1, TCF7L2, PTPRQ, ATP2B2, KCNQ4, CLIC5, ITGA8, PKD2, ZFPM2, MKL2, BMP7, ALX4, CHRNA10, ALX1	778	172	13528	1.81969	1	0.525393	30.8419
GOTERM_BP_FAT	GO:0045664~regulation of neuron differentiation	15	1.39925	0.0205277	MAG, NRP1, PTPRF, PLXNB2, BARHL2, ISL1, TIMP2, NTRK3, ASCL1, TGIF2, SEMA3A, DNMT3B, NKX2-2, CHRNA3, ASPM	778	133	13528	1.96107	1	0.525355	31.1495
GOTERM_BP_FAT	GO:0009165~nucleotide biosynthetic process	19	1.77239	0.0209482	ATP1B1, ATP10B, ADCY6, ATP11A, AK5, AMPD3, ATP13A5, ATP13A4, CMPK2, ATP7A, ATP2B2, ATP2B3, ADCY9, RRM2, ATP2A1, NPPC, ATP8B2, NT5E, ATP8B4	778	186	13528	1.77621	1	0.52837	31.6795
GOTERM_BP_FAT	GO:0006163~purine nucleotide metabolic process	19	1.77239	0.0209482	ATP1B1, ATP10B, ENPP1, ADCY6, ATP11A, AK5, MYH7, AMPD3, ATP13A5, ATP13A4, ATP7A, ATP2B2, ATP2B3, ADCY9, ATP2A1, NPPC, ATP8B2, NT5E, ATP8B4	778	186	13528	1.77621	1	0.52837	31.6795
GOTERM_BP_FAT	GO:0009072~aromatic amino acid family metabolic process	5	0.466418	0.0209648	DCT, ATP7A, TYR, PAH, AFMID	778	19	13528	4.57584	1	0.524464	31.7003
GOTERM_BP_FAT	GO:0010907~positive regulation of glucose metabolic process	5	0.466418	0.0209648	IRS2, HNF4A, INSR, PPARGC1A, IRS1	778	19	13528	4.57584	1	0.524464	31.7003
GOTERM_BP_FAT	GO:0006109~regulation of carbohydrate metabolic process	7	0.652985	0.022691	IRS2, HNF4A, ENPP1, PFKFB1, INSR, PPARGC1A, IRS1	778	39	13528	3.12095	1	0.548807	33.8351
GOTERM_BP_FAT	GO:0007423~sensory organ development	22	2.05224	0.0230654	EGFR, MYO7A, OTX1, ERBB2, MITF, SIX4, PROX1, PTPRQ, TGFB2, ASCL1, ATP2B2, KCNQ4, CRB1, GRIN2B, CLIC5, ITGA8, TGIF2, BMP7, COL8A1, COL8A2, CHRNA10, DSCAM	778	229	13528	1.67048	1	0.550602	34.2897
GOTERM_BP_FAT	GO:0045926~negative regulation of growth	13	1.21269	0.0238624	NRP1, ENPP1, PML, OSGIN1, TP73, TGFB2, CTH, CDKN1A, DAB2, HNF4A, TRO, TNK1, SEMA3A	778	110	13528	2.05497	1	0.55887	35.2478
GOTERM_BP_FAT	GO:0000904~cell morphogenesis involved in differentiation	23	2.14552	0.0241701	DCC, NRP1, MYO7A, ERBB2, DPYSL5, CELSR2, ISL1, SOX9, PROX1, TGFB2, ATP2B2, EPHA4, DAB2, SLITRK4, CLIC5, TNR, EFNA5, ANTXR1, SEMA3A, LAMB1, BMP7, DSCAM, NFATC1	778	244	13528	1.63905	1	0.559472	35.6141
GOTERM_BP_FAT	GO:0010676~positive regulation of cellular carbohydrate metabolic process	5	0.466418	0.0250451	IRS2, HNF4A, INSR, PPARGC1A, IRS1	778	20	13528	4.34704	1	0.568461	36.6451
GOTERM_BP_FAT	GO:0045913~positive regulation of carbohydrate metabolic process	5	0.466418	0.0250451	IRS2, HNF4A, INSR, PPARGC1A, IRS1	778	20	13528	4.34704	1	0.568461	36.6451
GOTERM_BP_FAT	GO:0051181~cofactor transport	5	0.466418	0.0250451	CPT2, FOLR2, FOLR1, SLC5A6, SLC19A1	778	20	13528	4.34704	1	0.568461	36.6451
GOTERM_BP_FAT	GO:0043467~regulation of generation of precursor metabolites and energy	6	0.559701	0.0266018	ATP7A, IRS2, ENPP1, PRDM16, INSR, IRS1	778	30	13528	3.47763	1	0.586677	38.4409
GOTERM_BP_FAT	GO:0060284~regulation of cell development	20	1.86567	0.0269169	MAG, ZNF488, NRP1, PTPRF, PLXNB2, BARHL2, DLL3, ISL1, TIMP2, PROX1, TGFB2, NTRK3, ASCL1, TGIF2, SEMA3A, BMP7, DNMT3B, NKX2-2, ASPM, CHRNA3	778	205	13528	1.69641	1	0.587044	38.7985
GOTERM_BP_FAT	GO:0035113~embryonic appendage morphogenesis	11	1.02612	0.0271134	MSX2, NOTCH2, MSX1, C2CD3, RAB23, LRP6, ZBTB16, FBN2, ALX4, LRP5, ALX1	778	87	13528	2.1985	1	0.58579	39.0206
GOTERM_BP_FAT	GO:0030326~embryonic limb morphogenesis	11	1.02612	0.0271134	MSX2, NOTCH2, MSX1, C2CD3, RAB23, LRP6, ZBTB16, FBN2, ALX4, LRP5, ALX1	778	87	13528	2.1985	1	0.58579	39.0206
GOTERM_BP_FAT	GO:0009150~purine ribonucleotide metabolic process	15	1.39925	0.0272462	ATP1B1, ATP10B, ATP11A, AK5, MYH7, AMPD3, ATP13A5, ATP13A4, ATP7A, ATP2B2, ATP2B3, ATP2A1, ATP8B2, NT5E, ATP8B4	778	138	13528	1.89002	1	0.583695	39.1702
GOTERM_BP_FAT	GO:0051960~regulation of nervous system development	19	1.77239	0.0277762	MAG, ZNF488, NRP1, PTPRF, PLXNB2, BARHL2, DLL3, ISL1, TIMP2, NTRK3, ASCL1, TGIF2, SEMA3A, EGF, BMP7, DNMT3B, NKX2-2, ASPM, CHRNA3	778	192	13528	1.7207	1	0.586962	39.7637
GOTERM_BP_FAT	GO:0034654~nucleobase, nucleoside, nucleotide and nucleic acid biosynthetic process	19	1.77239	0.02906	ATP1B1, ATP10B, ADCY6, ATP11A, AK5, AMPD3, ATP13A5, ATP13A4, CMPK2, ATP7A, ATP2B2, ATP2B3, ADCY9, RRM2, ATP2A1, NPPC, ATP8B2, NT5E, ATP8B4	778	193	13528	1.71179	1	0.599904	41.1791
GOTERM_BP_FAT	GO:0034404~nucleobase, nucleoside and nucleotide biosynthetic process	19	1.77239	0.02906	ATP1B1, ATP10B, ADCY6, ATP11A, AK5, AMPD3, ATP13A5, ATP13A4, CMPK2, ATP7A, ATP2B2, ATP2B3, ADCY9, RRM2, ATP2A1, NPPC, ATP8B2, NT5E, ATP8B4	778	193	13528	1.71179	1	0.599904	41.1791
GOTERM_BP_FAT	GO:0042428~serotonin metabolic process	3	0.279851	0.0293332	ATP7A, ATP2B2, GRIN2A	778	5	13528	10.4329	1	0.599587	41.4762
GOTERM_BP_FAT	GO:0010560~positive regulation of glycoprotein biosynthetic process	3	0.279851	0.0293332	PAWR, INSR, TCF7L2	778	5	13528	10.4329	1	0.599587	41.4762
GOTERM_BP_FAT	GO:0048598~embryonic morphogenesis	27	2.51866	0.0307955	CER1, MYO7A, ZBTB16, TCF7L2, ZIC2, MSX2, ATP2B2, KCNQ4, RAB23, FBN2, ALX4, ALX1, C2CD3, OTX1, PCDH8, SIX4, PROX1, PTPRQ, NOTCH2, MSX1, CLIC5, ITGA8, ZIC5, LRP6, BMP7, CHRNA10, LRP5	778	307	13528	1.52925	1	0.613952	43.0426
GOTERM_BP_FAT	GO:0006754~ATP biosynthetic process	11	1.02612	0.0311443	ATP7A, ATP2B2, ATP1B1, ATP2B3, ATP10B, ATP2A1, ATP8B2, ATP11A, ATP13A5, ATP8B4, ATP13A4	778	89	13528	2.1491	1	0.614426	43.4103
GOTERM_BP_FAT	GO:0031344~regulation of cell projection organization	11	1.02612	0.0311443	NTRK3, MAG, PRKCQ, NRP1, PTPRF, PLXNB2, ERMN, BARHL2, ITGA2, SEMA3A, CHRNA3	778	89	13528	2.1491	1	0.614426	43.4103
GOTERM_BP_FAT	GO:0006468~protein amino acid phosphorylation	51	4.75746	0.0323486	STK38, STK36, PKMYT1, LPAR2, TGFB2, ACVR1C, PSKH1, MAP3K4, MDFIC, GAB1, EEF2K, STK39, MASTL, INSR, EGFR, SGK1, SGK2, CDK6, PRKCG, PBK, ALK, CDK2, DAPK1, PRKCQ, MAP3K15, MAPK4, HIPK2, NRK, NEK5, FGFR2, ERBB2, PML, TRIB1, ADRA2A, PRKAA2, EGF, PTPRE, ALPK2, FLT4, PDK4, EPHA1, EPHA2, NTRK3, EPHA4, TEX14, PRLR, SPTBN1, TNK1, JAK3, BMP7, ABL2	778	667	13528	1.32953	1	0.624907	44.6628
GOTERM_BP_FAT	GO:0007178~transmembrane receptor protein serine/threonine kinase signaling pathway	12	1.1194	0.0340606	CER1, MSX2, PTPRK, WFIKKN2, MSX1, LTBP2, HIPK2, PML, SPTBN1, GDF15, BMP7, TGFB2	778	103	13528	2.02581	1	0.640542	46.3984
GOTERM_BP_FAT	GO:0051329~interphase of mitotic cell cycle	12	1.1194	0.0340606	E2F1, EGFR, CCNB1, BCAT1, CDKN1A, POLE, MTBP, CENPF, CDK6, CDCA5, CDK2, NFATC1	778	103	13528	2.02581	1	0.640542	46.3984
GOTERM_BP_FAT	GO:0034599~cellular response to oxidative stress	7	0.652985	0.034995	SLC11A2, ATP7A, PTPRK, PXDN, EPAS1, PML, TPO	778	43	13528	2.83063	1	0.647047	47.3238
GOTERM_BP_FAT	GO:0001556~oocyte maturation	4	0.373134	0.0350319	CCNB1, BRCA2, FBXO5, PDE3A	778	13	13528	5.35021	1	0.643855	47.36
GOTERM_BP_FAT	GO:0006928~cell motion	38	3.54478	0.0362519	CER1, DCC, DNAH11, DNAH9, NRP1, ENPP2, ERBB2, WASF2, DNAH3, DNAH1, DNAH2, DNAH5, TGFB2, DNALI1, RSPH4A, TNR, ADRA2A, TEKT2, STRBP, SEMA3A, THBS4, PTPRK, IL6, FOXJ1, ARID5B, BARHL2, DPYSL5, DCDC2, ITGA2, SIX4, ISL1, EPHA4, ASCL1, LYVE1, LRP6, EFNA5, BMP7, LRP5	778	475	13528	1.39105	1	0.653115	48.5448
GOTERM_BP_FAT	GO:0009205~purine ribonucleoside triphosphate metabolic process	13	1.21269	0.0362979	ATP7A, ATP2B2, ATP2B3, ATP1B1, ATP10B, ATP2A1, ATP8B2, ATP11A, MYH7, AK5, ATP13A5, ATP8B4, ATP13A4	778	117	13528	1.93202	1	0.650074	48.589
GOTERM_BP_FAT	GO:0009152~purine ribonucleotide biosynthetic process	13	1.21269	0.0362979	ATP7A, ATP2B2, ATP2B3, ATP1B1, ATP10B, ATP2A1, ATP8B2, ATP11A, AK5, AMPD3, ATP13A5, ATP8B4, ATP13A4	778	117	13528	1.93202	1	0.650074	48.589
GOTERM_BP_FAT	GO:0048839~inner ear development	10	0.932836	0.0367613	ATP2B2, KCNQ4, CLIC5, ITGA8, OTX1, MYO7A, SIX4, PROX1, CHRNA10, PTPRQ	778	79	13528	2.20103	1	0.651341	49.032
GOTERM_BP_FAT	GO:0016310~phosphorylation	59	5.50373	0.0373221	STK38, STK36, PIP5K1B, PKMYT1, LPAR2, TGFB2, ACVR1C, PSKH1, MAP3K4, MDFIC, GAB1, EEF2K, STK39, MASTL, INSR, EGFR, ND1, SGK1, SGK2, ND4, ND5, ND2, PI4KA, PRKCG, CDK6, PBK, ALK, CDK2, DAPK1, PRKCQ, MAP3K15, MAPK4, HIPK2, NRK, NEK5, FGFR2, ERBB2, PFKFB1, PML, CYTB, TRIB1, ADRA2A, PRKAA2, EGF, PTPRE, ALPK2, FLT4, PDK4, EPHA1, EPHA2, NTRK3, EPHA4, ND4L, TEX14, PRLR, SPTBN1, TNK1, JAK3, BMP7, ABL2	778	800	13528	1.28238	1	0.653559	49.5634
GOTERM_BP_FAT	GO:0022604~regulation of cell morphogenesis	14	1.30597	0.0379779	MAG, FGD1, NRP1, PTPRF, PLXNB2, BARHL2, ERMN, PALMD, TGFB2, NTRK3, MYH14, SEMA3A, CDC42EP3, CHRNA3	778	131	13528	1.85828	1	0.656663	50.1781
GOTERM_BP_FAT	GO:0009141~nucleoside triphosphate metabolic process	14	1.30597	0.0379779	ATP1B1, ATP10B, ENPP1, ATP11A, AK5, MYH7, ATP13A5, ATP13A4, ATP7A, ATP2B2, ATP2B3, ATP2A1, ATP8B2, ATP8B4	778	131	13528	1.85828	1	0.656663	50.1781
GOTERM_BP_FAT	GO:0009199~ribonucleoside triphosphate metabolic process	13	1.21269	0.0383902	ATP7A, ATP2B2, ATP2B3, ATP1B1, ATP10B, ATP2A1, ATP8B2, ATP11A, MYH7, AK5, ATP13A5, ATP8B4, ATP13A4	778	118	13528	1.91565	1	0.657322	50.5609
GOTERM_BP_FAT	GO:0008630~DNA damage response, signal transduction resulting in induction of apoptosis	6	0.559701	0.0385096	NUPR1, HIPK2, PML, BRCA2, RPS27L, TP73	778	33	13528	3.16149	1	0.655132	50.6713
GOTERM_BP_FAT	GO:0006793~phosphorus metabolic process	70	6.52985	0.0386887	STK38, STK36, PIP5K1B, PKMYT1, LPAR2, TGFB2, ACVR1C, PSKH1, MAP3K4, MDFIC, GAB1, EEF2K, SYNJ2, STK39, MASTL, INSR, EGFR, PTPRK, ND1, SGK1, SGK2, ND4, PTPRF, ND5, PTPRG, ND2, PI4KA, PRKCG, CDK6, PBK, ALK, CDK2, DAPK1, PTPRQ, PRKCQ, MAP3K15, PPEF1, MAPK4, HIPK2, NRK, NEK5, FGFR2, INPP1, ENPP1, ENPP2, ERBB2, PFKFB1, PML, CYTB, TRIB1, ADRA2A, PRKAA2, GK5, EGF, PTPRE, ALPK2, FLT4, PDK4, PTPN14, EPHA1,…	778	973	13528	1.25095	1	0.653546	50.8363
GOTERM_BP_FAT	GO:0006796~phosphate metabolic process	70	6.52985	0.0386887	STK38, STK36, PIP5K1B, PKMYT1, LPAR2, TGFB2, ACVR1C, PSKH1, MAP3K4, MDFIC, GAB1, EEF2K, SYNJ2, STK39, MASTL, INSR, EGFR, PTPRK, ND1, SGK1, SGK2, ND4, PTPRF, ND5, PTPRG, ND2, PI4KA, PRKCG, CDK6, PBK, ALK, CDK2, DAPK1, PTPRQ, PRKCQ, MAP3K15, PPEF1, MAPK4, HIPK2, NRK, NEK5, FGFR2, INPP1, ENPP1, ENPP2, ERBB2, PFKFB1, PML, CYTB, TRIB1, ADRA2A, PRKAA2, GK5, EGF, PTPRE, ALPK2, FLT4, PDK4, PTPN14, EPHA1,…	778	973	13528	1.25095	1	0.653546	50.8363
GOTERM_BP_FAT	GO:0014706~striated muscle tissue development	13	1.21269	0.040566	EP300, TNNC1, GATA6, ERBB2, DMD, ELN, ZFPM2, MYH7, SIX4, MKL2, PROX1, TGFB2, GJC1	778	119	13528	1.89955	1	0.667989	52.5356
GOTERM_BP_FAT	GO:0051325~interphase	12	1.1194	0.0407558	E2F1, EGFR, CCNB1, BCAT1, CDKN1A, POLE, MTBP, CENPF, CDK6, CDCA5, CDK2, NFATC1	778	106	13528	1.96847	1	0.66648	52.7043
GOTERM_BP_FAT	GO:0048562~embryonic organ morphogenesis	14	1.30597	0.0421239	MYO7A, OTX1, SIX4, PROX1, TCF7L2, PTPRQ, ATP2B2, KCNQ4, CLIC5, ITGA8, ALX4, BMP7, CHRNA10, ALX1	778	133	13528	1.83033	1	0.675592	53.9035
GOTERM_BP_FAT	GO:0016055~Wnt receptor signaling pathway	14	1.30597	0.0421239	FZD9, TCF7, CCDC88C, MITF, CELSR2, FZD4, TCF7L2, FZD7, SFRP5, RSPO1, SFRP1, SOSTDC1, LRP6, LRP5	778	133	13528	1.83033	1	0.675592	53.9035
GOTERM_BP_FAT	GO:0060088~auditory receptor cell stereocilium organization	3	0.279851	0.042344	ATP2B2, CLIC5, MYO7A	778	6	13528	8.69409	1	0.674347	54.0938
GOTERM_BP_FAT	GO:0046498~S-adenosylhomocysteine metabolic process	3	0.279851	0.042344	OCLN, GNMT, DNMT3B	778	6	13528	8.69409	1	0.674347	54.0938
GOTERM_BP_FAT	GO:0002093~auditory receptor cell morphogenesis	3	0.279851	0.042344	ATP2B2, CLIC5, MYO7A	778	6	13528	8.69409	1	0.674347	54.0938
GOTERM_BP_FAT	GO:0045596~negative regulation of cell differentiation	20	1.86567	0.0425358	MAG, HIST4H4, NRP1, ENPP1, FOXJ1, CREBBP, DLL3, CDK6, ITGB3, ZBTB16, ISL1, SOX9, PRDM16, TCF7L2, NOTCH2, PIWIL2, SEMA3A, BMP7, NKX2-2, ASPM	778	216	13528	1.61002	1	0.672871	54.2589
GOTERM_BP_FAT	GO:0030318~melanocyte differentiation	4	0.373134	0.0427311	TYRP1, MITF, OCA2, RAB27A	778	14	13528	4.96805	1	0.671444	54.4265
GOTERM_BP_FAT	GO:0006586~indolalkylamine metabolic process	4	0.373134	0.0427311	ATP7A, ATP2B2, GRIN2A, AFMID	778	14	13528	4.96805	1	0.671444	54.4265
GOTERM_BP_FAT	GO:0042434~indole derivative metabolic process	4	0.373134	0.0427311	ATP7A, ATP2B2, GRIN2A, AFMID	778	14	13528	4.96805	1	0.671444	54.4265
GOTERM_BP_FAT	GO:0005979~regulation of glycogen biosynthetic process	4	0.373134	0.0427311	IRS2, ENPP1, INSR, IRS1	778	14	13528	4.96805	1	0.671444	54.4265
GOTERM_BP_FAT	GO:0010962~regulation of glucan biosynthetic process	4	0.373134	0.0427311	IRS2, ENPP1, INSR, IRS1	778	14	13528	4.96805	1	0.671444	54.4265
GOTERM_BP_FAT	GO:0032885~regulation of polysaccharide biosynthetic process	4	0.373134	0.0427311	IRS2, ENPP1, INSR, IRS1	778	14	13528	4.96805	1	0.671444	54.4265
GOTERM_BP_FAT	GO:0042430~indole and derivative metabolic process	4	0.373134	0.0427311	ATP7A, ATP2B2, GRIN2A, AFMID	778	14	13528	4.96805	1	0.671444	54.4265
GOTERM_BP_FAT	GO:0009259~ribonucleotide metabolic process	15	1.39925	0.0432149	ATP1B1, ATP10B, ATP11A, AK5, MYH7, AMPD3, ATP13A5, ATP13A4, ATP7A, ATP2B2, ATP2B3, ATP2A1, ATP8B2, NT5E, ATP8B4	778	147	13528	1.7743	1	0.67254	54.8392
GOTERM_BP_FAT	GO:0008283~cell proliferation	35	3.26493	0.0433238	E2F1, BCAT1, ERBB2, ELN, CD70, EHF, IL15, TCF7L2, TGFB2, GPC4, KIF2C, DAB2, GAB1, COL8A1, COL8A2, ASPM, OCA2, FZD9, EGFR, IRS2, NOX5, MKI67, DLGAP5, CREBBP, KIF15, CENPF, BRCA2, ITGA2, GAS6, TACC2, ASCL1, UHRF1, BUB1B, TCF19, EMP1	778	436	13528	1.39584	1	0.670396	54.9316
GOTERM_BP_FAT	GO:0010565~regulation of cellular ketone metabolic process	8	0.746269	0.0437268	IRS2, CPT2, CAB39L, HNF4A, PRKAA2, PROX1, PPARGC1A, IRS1	778	57	13528	2.44045	1	0.670798	55.2721
GOTERM_BP_FAT	GO:0048738~cardiac muscle tissue development	8	0.746269	0.0437268	TNNC1, GATA6, ZFPM2, MYH7, MKL2, PROX1, TGFB2, GJC1	778	57	13528	2.44045	1	0.670798	55.2721
GOTERM_BP_FAT	GO:0048878~chemical homeostasis	40	3.73134	0.0437509	FXYD1, KCNMB4, C7, AQP9, ENPP1, GRIK1, ERBB2, TRHR, HFE, LPAR2, KCNA5, TCF7L2, BEST2, SLC11A2, ATP2B2, AGTR1, GRIN2B, SLC30A1, PKD2, TRPV4, INSR, JPH1, CHRNA3, LPL, IRS2, PLP1, AIFM3, EPAS1, RPH3AL, GRIN2A, NPY1R, LDLRAP1, IRS1, PPARGC1A, ATP7A, SLC4A10, HNF4A, CXCL13, ATP2A1, CLDN1	778	512	13528	1.35845	1	0.667968	55.2923
GOTERM_BP_FAT	GO:0015674~di-, tri-valent inorganic cation transport	17	1.58582	0.0462906	TRPC7, GRIN2A, SLC24A5, HFE, CACNB3, SLC11A2, ATP2B2, ATP2B3, SLC24A4, GRIN2B, ATP2A1, PKD2, TRPV4, JPH1, CHRNA10, STEAP1, NFATC1	778	176	13528	1.67954	1	0.68604	57.3814
GOTERM_BP_FAT	GO:0009144~purine nucleoside triphosphate metabolic process	13	1.21269	0.0476076	ATP7A, ATP2B2, ATP2B3, ATP1B1, ATP10B, ATP2A1, ATP8B2, ATP11A, MYH7, AK5, ATP13A5, ATP8B4, ATP13A4	778	122	13528	1.85284	1	0.69351	58.4281
GOTERM_BP_FAT	GO:0018958~phenol metabolic process	6	0.559701	0.0479965	ATP7A, EPAS1, SULT1B1, GRIN2A, PAH, TGFB2	778	35	13528	2.98083	1	0.693598	58.7325
GOTERM_BP_FAT	GO:0042060~wound healing	18	1.6791	0.048309	IL6, ERBB2, F8, ITGA2, ITGB3, F7, CDH3, TIMP3, TGFB2, CCNB1, NOTCH2, PRKCQ, HMCN1, HNF4A, DSP, PROS1, SYT17, RAB27A	778	191	13528	1.63868	1	0.693098	58.9756
GOTERM_BP_FAT	GO:0043408~regulation of MAPKKK cascade	12	1.1194	0.0483117	IL6, GRIN2B, MDFIC, ERBB2, LEPR, HIPK2, GAB1, LPAR2, TIMP2, INSR, TP73, TGFB2	778	109	13528	1.91429	1	0.690229	58.9777
GOTERM_BP_FAT	GO:0032989~cellular component morphogenesis	32	2.98507	0.051091	DCC, NRP1, ERBB2, MYO7A, SOX9, TGFB2, ATP2B2, DAB2, CRB1, TNR, DMD, SEMA3A, LAMB1, NFATC1, DSCAM, EGFR, C2CD3, FOXJ1, DPYSL5, NDC80, CELSR2, DNAI2, ISL1, PROX1, ATP7A, SFRP5, EPHA4, SLITRK4, CLIC5, EFNA5, ANTXR1, BMP7	778	397	13528	1.40157	1	0.708106	61.0808
GOTERM_BP_FAT	GO:0014003~oligodendrocyte development	4	0.373134	0.051199	ASCL1, ZNF488, PLP1, NKX2-2	778	15	13528	4.63685	1	0.706065	61.1605
GOTERM_BP_FAT	GO:0032881~regulation of polysaccharide metabolic process	4	0.373134	0.051199	IRS2, ENPP1, INSR, IRS1	778	15	13528	4.63685	1	0.706065	61.1605
GOTERM_BP_FAT	GO:0050000~chromosome localization	4	0.373134	0.051199	DLGAP5, KIF18A, CENPF, CDCA5	778	15	13528	4.63685	1	0.706065	61.1605
GOTERM_BP_FAT	GO:0050931~pigment cell differentiation	4	0.373134	0.051199	TYRP1, MITF, OCA2, RAB27A	778	15	13528	4.63685	1	0.706065	61.1605
GOTERM_BP_FAT	GO:0051303~establishment of chromosome localization	4	0.373134	0.051199	DLGAP5, KIF18A, CENPF, CDCA5	778	15	13528	4.63685	1	0.706065	61.1605
GOTERM_BP_FAT	GO:0030261~chromosome condensation	5	0.466418	0.0522215	NCAPH, NCAPG2, CDCA5, TOP2A, NCAPD2	778	25	13528	3.47763	1	0.710566	61.9068
GOTERM_BP_FAT	GO:0051270~regulation of cell motion	18	1.6791	0.0523555	EGFR, PTPRK, IRS2, IL6, NRP1, ENPP2, ITGA2, ABHD2, ITGB3, F7, IRS1, TRIB1, TGFB2, CXCL10, GAB1, SEMA3A, LAMB1, INSR	778	193	13528	1.6217	1	0.708739	62.0036
GOTERM_BP_FAT	GO:0009260~ribonucleotide biosynthetic process	13	1.21269	0.0527426	ATP7A, ATP2B2, ATP2B3, ATP1B1, ATP10B, ATP2A1, ATP8B2, ATP11A, AK5, AMPD3, ATP13A5, ATP8B4, ATP13A4	778	124	13528	1.82295	1	0.708705	62.2819
GOTERM_BP_FAT	GO:0050906~detection of stimulus involved in sensory perception	6	0.559701	0.0532127	ATP2B2, SLC12A2, GRIN2B, PPEF1, ITGA2, CHRNA10	778	36	13528	2.89803	1	0.70925	62.6174
GOTERM_BP_FAT	GO:0009206~purine ribonucleoside triphosphate biosynthetic process	11	1.02612	0.0545143	ATP7A, ATP2B2, ATP1B1, ATP2B3, ATP10B, ATP2A1, ATP8B2, ATP11A, ATP13A5, ATP8B4, ATP13A4	778	98	13528	1.95173	1	0.71545	63.5314
GOTERM_BP_FAT	GO:0031589~cell-substrate adhesion	11	1.02612	0.0545143	PTPRK, LYVE1, FREM1, ITGA8, PKD2, ITGA2, NID2, ANTXR1, ITGB3, LAMB1, ECM2	778	98	13528	1.95173	1	0.71545	63.5314
GOTERM_BP_FAT	GO:0044271~nitrogen compound biosynthetic process	27	2.51866	0.0552065	BCAT1, ATP1B1, ASS1, ATP10B, NAGS, ADCY6, PAH, CMPK2, TGFB2, ATP2B2, ATP2B3, ATP8B2, NT5E, ATP8B4, FECH, NOS1, ATP11A, AK5, AMPD3, ATP13A5, ATP13A4, ATP7A, CTH, ADCY9, RRM2, ATP2A1, NPPC	778	325	13528	1.44456	1	0.717412	64.0088
GOTERM_BP_FAT	GO:0060537~muscle tissue development	13	1.21269	0.0554457	EP300, TNNC1, GATA6, ERBB2, DMD, ELN, ZFPM2, MYH7, SIX4, MKL2, PROX1, TGFB2, GJC1	778	125	13528	1.80837	1	0.716345	64.1724
GOTERM_BP_FAT	GO:0043410~positive regulation of MAPKKK cascade	7	0.652985	0.055508	IL6, ERBB2, LEPR, HIPK2, LPAR2, INSR, TGFB2	778	48	13528	2.53578	1	0.714119	64.215
GOTERM_BP_FAT	GO:0015884~folic acid transport	3	0.279851	0.0570622	FOLR2, FOLR1, SLC19A1	778	7	13528	7.45207	1	0.721653	65.2599
GOTERM_BP_FAT	GO:0007435~salivary gland morphogenesis	3	0.279851	0.0570622	EGFR, BMP7, TGFB2	778	7	13528	7.45207	1	0.721653	65.2599
GOTERM_BP_FAT	GO:0042074~cell migration involved in gastrulation	3	0.279851	0.0570622	CER1, LRP6, LRP5	778	7	13528	7.45207	1	0.721653	65.2599
GOTERM_BP_FAT	GO:0031058~positive regulation of histone modification	3	0.279851	0.0570622	PML, PPARGC1A, DNMT3B	778	7	13528	7.45207	1	0.721653	65.2599
GOTERM_BP_FAT	GO:0060117~auditory receptor cell development	3	0.279851	0.0570622	ATP2B2, CLIC5, MYO7A	778	7	13528	7.45207	1	0.721653	65.2599
GOTERM_BP_FAT	GO:0009145~purine nucleoside triphosphate biosynthetic process	11	1.02612	0.0576737	ATP7A, ATP2B2, ATP1B1, ATP2B3, ATP10B, ATP2A1, ATP8B2, ATP11A, ATP13A5, ATP8B4, ATP13A4	778	99	13528	1.93202	1	0.722972	65.6631
GOTERM_BP_FAT	GO:0035108~limb morphogenesis	11	1.02612	0.0576737	MSX2, NOTCH2, MSX1, C2CD3, RAB23, LRP6, ZBTB16, FBN2, ALX4, LRP5, ALX1	778	99	13528	1.93202	1	0.722972	65.6631
GOTERM_BP_FAT	GO:0009201~ribonucleoside triphosphate biosynthetic process	11	1.02612	0.0576737	ATP7A, ATP2B2, ATP1B1, ATP2B3, ATP10B, ATP2A1, ATP8B2, ATP11A, ATP13A5, ATP8B4, ATP13A4	778	99	13528	1.93202	1	0.722972	65.6631
GOTERM_BP_FAT	GO:0035107~appendage morphogenesis	11	1.02612	0.0576737	MSX2, NOTCH2, MSX1, C2CD3, RAB23, LRP6, ZBTB16, FBN2, ALX4, LRP5, ALX1	778	99	13528	1.93202	1	0.722972	65.6631
GOTERM_BP_FAT	GO:0001667~ameboidal cell migration	6	0.559701	0.0587453	CER1, ARID5B, WASF2, LRP6, ISL1, LRP5	778	37	13528	2.8197	1	0.727144	66.359
GOTERM_BP_FAT	GO:0030330~DNA damage response, signal transduction by p53 class mediator	5	0.466418	0.0590217	NUPR1, HIPK2, PML, BRCA2, RPS27L	778	26	13528	3.34388	1	0.726318	66.5363
GOTERM_BP_FAT	GO:0021782~glial cell development	5	0.466418	0.0590217	EGFR, ASCL1, ZNF488, PLP1, NKX2-2	778	26	13528	3.34388	1	0.726318	66.5363
GOTERM_BP_FAT	GO:0019217~regulation of fatty acid metabolic process	7	0.652985	0.0603238	IRS2, CPT2, CAB39L, HNF4A, PRKAA2, PPARGC1A, IRS1	778	49	13528	2.48402	1	0.731763	67.3598
GOTERM_BP_FAT	GO:0022612~gland morphogenesis	4	0.373134	0.06041	EGFR, ERBB2, BMP7, TGFB2	778	16	13528	4.34704	1	0.729787	67.4137
GOTERM_BP_FAT	GO:0030334~regulation of cell migration	16	1.49254	0.0620785	EGFR, PTPRK, IRS2, IL6, ENPP2, ITGA2, ABHD2, ITGB3, F7, IRS1, TRIB1, TGFB2, CXCL10, GAB1, LAMB1, INSR	778	169	13528	1.64622	1	0.737225	68.4394
GOTERM_BP_FAT	GO:0006816~calcium ion transport	14	1.30597	0.0647107	TRPC7, GRIN2A, SLC24A5, CACNB3, ATP2B2, ATP2B3, SLC24A4, GRIN2B, ATP2A1, PKD2, TRPV4, JPH1, CHRNA10, NFATC1	778	142	13528	1.71433	1	0.74977	69.9958
GOTERM_BP_FAT	GO:0048015~phosphoinositide-mediated signaling	10	0.932836	0.0652153	AGTR1, HIST4H4, CA8, ERBB2, PI4KA, BUB1B, NDC80, UBE2C, HTR2C, TOP2A	778	88	13528	1.97593	1	0.750156	70.2857
GOTERM_BP_FAT	GO:0009142~nucleoside triphosphate biosynthetic process	11	1.02612	0.0678603	ATP7A, ATP2B2, ATP1B1, ATP2B3, ATP10B, ATP2A1, ATP8B2, ATP11A, ATP13A5, ATP8B4, ATP13A4	778	102	13528	1.8752	1	0.761954	71.7628
GOTERM_BP_FAT	GO:0030879~mammary gland development	8	0.746269	0.0684566	XDH, ATP2B2, IRS2, PRLR, ERBB2, BRCA2, ITGA2, IRS1	778	63	13528	2.20802	1	0.762719	72.0861
GOTERM_BP_FAT	GO:0030335~positive regulation of cell migration	10	0.932836	0.0690483	EGFR, IRS2, IL6, ITGA2, F7, LAMB1, INSR, IRS1, TGFB2, CXCL10	778	89	13528	1.95373	1	0.763449	72.4035
GOTERM_BP_FAT	GO:0042592~homeostatic process	54	5.03731	0.0699113	AQP9, GRIK1, PDIA5, LPAR2, AGTR1, ATP2B2, GRIN2B, TRPV4, JPH1, INSR, CHRNA3, IRS2, AIFM3, GRIN2A, RPH3AL, LDLRAP1, IRS1, PPARGC1A, EP300, HNF4A, CLDN1, XDH, FXYD1, KCNMB4, C7, ENPP1, ERBB2, TRHR, HFE, KCNA5, TCF7L2, TIMP1, SLC11A2, BEST2, SLC30A1, DMD, PKD2, LPL, PLP1, IL6, CUBN, EPAS1, SLC12A2, SLC12A4, CREBBP, NXNL1, ITGA2, BPGM, NPY1R, ATP7A, SLC4A10, CCNB2, CXCL13, ATP2A1	778	751	13528	1.25028	1	0.765542	72.8602
GOTERM_BP_FAT	GO:0042177~negative regulation of protein catabolic process	4	0.373134	0.0703339	GRIN2A, PRKCG, TIMP3, TIMP1	778	17	13528	4.09134	1	0.765393	73.0812
GOTERM_BP_FAT	GO:0018205~peptidyl-lysine modification	4	0.373134	0.0703339	ATP7A, CTH, EP300, CREBBP	778	17	13528	4.09134	1	0.765393	73.0812
GOTERM_BP_FAT	GO:0060173~limb development	11	1.02612	0.0714947	MSX2, NOTCH2, MSX1, C2CD3, RAB23, LRP6, ZBTB16, FBN2, ALX4, LRP5, ALX1	778	103	13528	1.85699	1	0.768902	73.6797
GOTERM_BP_FAT	GO:0048736~appendage development	11	1.02612	0.0714947	MSX2, NOTCH2, MSX1, C2CD3, RAB23, LRP6, ZBTB16, FBN2, ALX4, LRP5, ALX1	778	103	13528	1.85699	1	0.768902	73.6797
GOTERM_BP_FAT	GO:0051248~negative regulation of protein metabolic process	17	1.58582	0.0719593	ENPP1, GRIN2A, PML, PRKCG, IGF2BP2, CDC20, ITGB3, IGF2BP3, UBE2C, TIMP3, TIMP1, HNF4A, RAB23, BUB1B, FBXO5, INSR, DNMT3B	778	187	13528	1.58074	1	0.768944	73.9157
GOTERM_BP_FAT	GO:0042127~regulation of cell proliferation	56	5.22388	0.0721387	NRP1, E2F7, FGFRL1, MITF, FOXO1, PAWR, IL15, CXCL10, TGFB2, AGTR1, MTBP, DLG3, IL13RA1, INSR, EGFR, PTPRK, HYAL1, IRS2, PTPRF, FOXJ1, CDK6, PROX1, IRS1, CDK2, PRKCQ, CTH, MSX1, HNF4A, HIPK2, NPPC, CER1, FGFR2, ERBB2, PML, ZBTB16, SOX9, TIMP2, TIMP1, TRIB1, MSX2, KRT5, ADRA2A, LAMB1, EGF, KLF5, IL6, FLT4, ITGA2, BRCA2, NOTCH2, CDKN1A, NUPR1, BMP7, CHRNA10, NFIB, LRP5	778	787	13528	1.23728	1	0.767599	74.0063
GOTERM_BP_FAT	GO:0050953~sensory perception of light stimulus	19	1.77239	0.0721817	EPAS1, MYO7A, EFEMP1, CYTB, PCDH15, CDH3, CDS1, ABCA4, TIMP3, MFRP, GJC1, TULP2, SFRP5, TYR, RDH10, HMCN1, CRB1, GRM8, CA4	778	216	13528	1.52952	1	0.765596	74.0279
GOTERM_BP_FAT	GO:0007601~visual perception	19	1.77239	0.0721817	EPAS1, MYO7A, EFEMP1, CYTB, PCDH15, CDH3, CDS1, ABCA4, TIMP3, MFRP, GJC1, TULP2, SFRP5, TYR, RDH10, HMCN1, CRB1, GRM8, CA4	778	216	13528	1.52952	1	0.765596	74.0279
GOTERM_BP_FAT	GO:0042136~neurotransmitter biosynthetic process	3	0.279851	0.0732492	NOS1, PAH, GAD1	778	8	13528	6.52057	1	0.768575	74.5604
GOTERM_BP_FAT	GO:0048266~behavioral response to pain	3	0.279851	0.0732492	GRIN2B, GRIK1, SCN9A	778	8	13528	6.52057	1	0.768575	74.5604
GOTERM_BP_FAT	GO:0060122~inner ear receptor stereocilium organization	3	0.279851	0.0732492	ATP2B2, CLIC5, MYO7A	778	8	13528	6.52057	1	0.768575	74.5604
GOTERM_BP_FAT	GO:0007184~SMAD protein nuclear translocation	3	0.279851	0.0732492	PML, SPTBN1, TGFB2	778	8	13528	6.52057	1	0.768575	74.5604
GOTERM_BP_FAT	GO:0046321~positive regulation of fatty acid oxidation	3	0.279851	0.0732492	IRS2, PPARGC1A, IRS1	778	8	13528	6.52057	1	0.768575	74.5604
GOTERM_BP_FAT	GO:0018065~protein-cofactor linkage	3	0.279851	0.0732492	CTH, NNAT, GAD1	778	8	13528	6.52057	1	0.768575	74.5604
GOTERM_BP_FAT	GO:0051046~regulation of secretion	18	1.6791	0.0734997	KCNMB4, IL6, RAB8B, GRIK1, NNAT, RPH3AL, STXBP2, NPY1R, TCF7L2, ACVR1C, TGFB2, AGTR1, PRKCQ, GRIN2B, GRM8, EGF, HTR2C, CHRNA3	778	202	13528	1.54944	1	0.767598	74.6839
GOTERM_BP_FAT	GO:0010769~regulation of cell morphogenesis involved in differentiation	9	0.839552	0.0737638	NTRK3, MAG, NRP1, PTPRF, PLXNB2, BARHL2, SEMA3A, CHRNA3, TGFB2	778	77	13528	2.03238	1	0.766694	74.8134
GOTERM_BP_FAT	GO:0007173~epidermal growth factor receptor signaling pathway	5	0.466418	0.0739549	EGFR, CBL, GAB1, EGF, GRB7	778	28	13528	3.10503	1	0.765451	74.9068
GOTERM_BP_FAT	GO:0009582~detection of abiotic stimulus	8	0.746269	0.0782401	ATP2B2, FECH, SLC12A2, GRIN2B, PKD2, ITGA2, ABCA4, CHRNA10	778	65	13528	2.14008	1	0.783021	76.9161
GOTERM_BP_FAT	GO:0042063~gliogenesis	8	0.746269	0.0782401	EGFR, ASCL1, ZNF488, PLP1, ERBB2, CDK6, NKX2-2, TGFB2	778	65	13528	2.14008	1	0.783021	76.9161
GOTERM_BP_FAT	GO:0007292~female gamete generation	8	0.746269	0.0782401	CCNB1, DIAPH2, LEPR, PIWIL2, BRCA2, FBXO5, PDE3A, PAQR5	778	65	13528	2.14008	1	0.783021	76.9161
GOTERM_BP_FAT	GO:0030278~regulation of ossification	9	0.839552	0.0782804	IL6, SFRP1, ENPP1, NPPC, RSAD2, CDK6, SOX9, BMP7, TGFB2	778	78	13528	2.00633	1	0.781118	76.9342
GOTERM_BP_FAT	GO:0009310~amine catabolic process	9	0.839552	0.0782804	BCAT1, MCCC2, ASPA, NOS1, DIO3, AASS, PAH, GAD1, AFMID	778	78	13528	2.00633	1	0.781118	76.9342
GOTERM_BP_FAT	GO:0006357~regulation of transcription from RNA polymerase II promoter	52	4.85075	0.0795405	E2F1, MITF, FOXO1, PAWR, ZIC3, GATA6, MKL2, ALX4, ALX1, ATF7IP, FOXJ1, OTX1, BARHL2, SOX12, HNF4G, SIX4, PPARGC1A, PROX1, ASCL1, UHRF1, EP300, MSX1, HNF4A, HIPK2, NCOA6, ZFPM2, GLIS3, SOX9, PRDM16, TCF7L2, SOX8, MED12L, NFAT5, NKX2-2, PLAGL2, BMP3, IL6, TCF7, EPAS1, KLF12, MAML2, CREBBP, TEAD1, TEAD2, TEAD3, ISL1, SP2, HIVEP1, TCF19, JAK3, BMP7, NFIB	778	727	13528	1.24372	1	0.784571	77.4951
GOTERM_BP_FAT	GO:0046942~carboxylic acid transport	14	1.30597	0.0801969	SLC13A5, CPT2, AQP9, SLC38A11, SLC3A1, SLC7A4, SLC19A1, SLC16A5, FOLR2, SLC16A6, FOLR1, SLC23A2, SLC5A6, OCA2	778	147	13528	1.65602	1	0.785357	77.7822
GOTERM_BP_FAT	GO:0000080~G1 phase of mitotic cell cycle	4	0.373134	0.0809367	E2F1, MTBP, CDK6, CDK2	778	18	13528	3.86404	1	0.786487	78.1015
GOTERM_BP_FAT	GO:0001837~epithelial to mesenchymal transition	4	0.373134	0.0809367	SOX9, BMP7, NFATC1, TGFB2	778	18	13528	3.86404	1	0.786487	78.1015
GOTERM_BP_FAT	GO:0010035~response to inorganic substance	18	1.6791	0.0816562	EGFR, XDH, PTPRK, KCNMB4, PXDN, AQP9, TNNC1, MYH7, HVCN1, SLC11A2, ATP7A, CDKN1A, EP300, TPO, CA2, IGFBP2, INSR, CHRNA3	778	205	13528	1.52677	1	0.787515	78.408
GOTERM_BP_FAT	GO:0042278~purine nucleoside metabolic process	5	0.466418	0.0820705	OCLN, PANK1, GNMT, NT5E, DNMT3B	778	29	13528	2.99796	1	0.787253	78.5826
GOTERM_BP_FAT	GO:0046128~purine ribonucleoside metabolic process	5	0.466418	0.0820705	OCLN, PANK1, GNMT, NT5E, DNMT3B	778	29	13528	2.99796	1	0.787253	78.5826
GOTERM_BP_FAT	GO:0010324~membrane invagination	19	1.77239	0.0826485	MRC1, STON2, DNM3, CUBN, GULP1, MYO7A, SORL1, WASF2, HFE, LDLRAP1, ELMO3, DAB2, AP1S2, DOCK1, FOLR1, LRP6, RIN1, LRP5, HIP1	778	220	13528	1.50171	1	0.787676	78.824
GOTERM_BP_FAT	GO:0006897~endocytosis	19	1.77239	0.0826485	MRC1, STON2, DNM3, CUBN, GULP1, MYO7A, SORL1, WASF2, HFE, LDLRAP1, ELMO3, DAB2, AP1S2, DOCK1, FOLR1, LRP6, RIN1, LRP5, HIP1	778	220	13528	1.50171	1	0.787676	78.824
GOTERM_BP_FAT	GO:0015849~organic acid transport	14	1.30597	0.0835548	SLC13A5, CPT2, AQP9, SLC38A11, SLC3A1, SLC7A4, SLC19A1, SLC16A5, FOLR2, SLC16A6, FOLR1, SLC23A2, SLC5A6, OCA2	778	148	13528	1.64483	1	0.789447	79.1973
GOTERM_BP_FAT	GO:0040012~regulation of locomotion	17	1.58582	0.0862625	EGFR, PTPRK, IRS2, IL6, ENPP2, ITGA2, ABHD2, ITGB3, F7, IRS1, TRIB1, TGFB2, CXCL10, GAB1, LAMB1, HTR2C, INSR	778	192	13528	1.53958	1	0.798358	80.276
GOTERM_BP_FAT	GO:0048545~response to steroid hormone stimulus	17	1.58582	0.0862625	IL6, LEPR, ERBB2, PFKFB1, BRCA2, NPY1R, AQP1, TIMP3, TGFB2, CDKN1A, EP300, CA4, HSD11B2, CA2, IGFBP2, BMP7, INSR	778	192	13528	1.53958	1	0.798358	80.276
GOTERM_BP_FAT	GO:0016051~carbohydrate biosynthetic process	11	1.02612	0.08724	ISYNA1, B3GALT1, XYLT1, GNE, GALNT5, CHST9, PFKFB1, ST8SIA2, PPARGC1A, GLCE, PC	778	107	13528	1.78757	1	0.800247	80.6523
GOTERM_BP_FAT	GO:0048732~gland development	13	1.21269	0.0876364	EGFR, XDH, ATP2B2, IRS2, PRLR, SFRP1, ERBB2, BRCA2, ITGA2, BMP7, ISL1, IRS1, TGFB2	778	135	13528	1.67442	1	0.799876	80.8029
GOTERM_BP_FAT	GO:0008629~induction of apoptosis by intracellular signals	7	0.652985	0.088	CDKN1A, NUPR1, HIPK2, PML, BRCA2, RPS27L, TP73	778	54	13528	2.25402	1	0.799384	80.9401
GOTERM_BP_FAT	GO:0006979~response to oxidative stress	15	1.39925	0.0893391	EGFR, PTPRK, PXDN, SGK2, EPAS1, PML, MYH7, SLC11A2, ATP7A, EP300, SLC23A2, GAB1, IPCEF1, TPO, CA3	778	164	13528	1.59038	1	0.802595	81.4375
GOTERM_BP_FAT	GO:0060119~inner ear receptor cell development	3	0.279851	0.0906881	ATP2B2, CLIC5, MYO7A	778	9	13528	5.79606	1	0.805762	81.9261
GOTERM_BP_FAT	GO:0048260~positive regulation of receptor-mediated endocytosis	3	0.279851	0.0906881	CBL, LDLRAP1, HIP1	778	9	13528	5.79606	1	0.805762	81.9261
GOTERM_BP_FAT	GO:0050691~regulation of defense response to virus by host	3	0.279851	0.0906881	DDX58, PML, IL15	778	9	13528	5.79606	1	0.805762	81.9261
GOTERM_BP_FAT	GO:0050910~detection of mechanical stimulus involved in sensory perception of sound	3	0.279851	0.0906881	ATP2B2, SLC12A2, CHRNA10	778	9	13528	5.79606	1	0.805762	81.9261
GOTERM_BP_FAT	GO:0006570~tyrosine metabolic process	3	0.279851	0.0906881	DCT, TYR, PAH	778	9	13528	5.79606	1	0.805762	81.9261
GOTERM_BP_FAT	GO:0017145~stem cell division	3	0.279851	0.0906881	ZBTB16, ASPM, TGFB2	778	9	13528	5.79606	1	0.805762	81.9261
GOTERM_BP_FAT	GO:0007368~determination of left/right symmetry	6	0.559701	0.0910939	DNAH11, NOTCH2, DISP1, PKD2, RFX3, ZIC3	778	42	13528	2.48402	1	0.805418	82.0707
GOTERM_BP_FAT	GO:0060079~regulation of excitatory postsynaptic membrane potential	4	0.373134	0.0921814	GRIN2B, GRIK1, GRIN2A, CHRNA3	778	19	13528	3.66067	1	0.807556	82.4528
GOTERM_BP_FAT	GO:0007059~chromosome segregation	9	0.839552	0.0927984	KIFC1, NCAPH, DLGAP5, KIF18A, CENPF, NDC80, CDCA5, TOP2A, NCAPD2	778	81	13528	1.93202	1	0.807971	82.6662
GOTERM_BP_FAT	GO:0009063~cellular amino acid catabolic process	8	0.746269	0.0943597	BCAT1, MCCC2, ASPA, NOS1, AASS, PAH, GAD1, AFMID	778	68	13528	2.04567	1	0.811716	83.1952
GOTERM_BP_FAT	GO:0032269~negative regulation of cellular protein metabolic process	16	1.49254	0.0944356	ENPP1, PML, PRKCG, IGF2BP2, CDC20, ITGB3, IGF2BP3, UBE2C, TIMP3, TIMP1, HNF4A, RAB23, BUB1B, FBXO5, INSR, DNMT3B	778	180	13528	1.54562	1	0.810208	83.2205
GOTERM_BP_FAT	GO:0043583~ear development	10	0.932836	0.0949504	ATP2B2, KCNQ4, CLIC5, ITGA8, OTX1, MYO7A, SIX4, PROX1, CHRNA10, PTPRQ	778	95	13528	1.83033	1	0.810244	83.3914
GOTERM_BP_FAT	GO:0030155~regulation of cell adhesion	13	1.21269	0.0952261	EMCN, ERBB2, ITGA2, CELSR2, CDK6, EDIL3, ECM2, TGFB2, PRLR, TNR, COL8A1, DPP4, ADAMDEC1	778	137	13528	1.64997	1	0.809448	83.4822
GOTERM_BP_FAT	GO:0046903~secretion	24	2.23881	0.0974219	CPLX2, IL6, NOX5, AQP9, STX2, LTBP2, RPH3AL, STXBP2, AQP1, TP73, LLGL2, CXCL10, TRAF3IP2, CEL, DAB2, TRIM36, NFAT5, TRPV4, CA2, UNC13C, SCNN1A, SLC22A2, CHRNA3, RAB27A	778	300	13528	1.39105	1	0.815241	84.1888
GOTERM_BP_FAT	GO:0051130~positive regulation of cellular component organization	16	1.49254	0.0978185	PTPRF, DLGAP5, PLXNB2, CBL, PML, ITGA2, PPARGC1A, LDLRAP1, PROX1, TGFB2, NTRK3, PRKCQ, EGF, INSR, DNMT3B, HIP1	778	181	13528	1.53708	1	0.814857	84.3134
GOTERM_BP_FAT	GO:0051899~membrane depolarization	6	0.559701	0.0984753	BEST2, AIFM3, GRIN2B, GRIK1, GRIN2A, CHRNA3	778	43	13528	2.42626	1	0.815347	84.5176
GOTERM_BP_FAT	GO:0007093~mitotic cell cycle checkpoint	6	0.559701	0.0984753	KNTC1, PML, BUB1B, CENPF, RPS27L, TRRAP	778	43	13528	2.42626	1	0.815347	84.5176
GOTERM_BP_FAT	GO:0009855~determination of bilateral symmetry	6	0.559701	0.0984753	DNAH11, NOTCH2, DISP1, PKD2, RFX3, ZIC3	778	43	13528	2.42626	1	0.815347	84.5176
GOTERM_BP_FAT	GO:0009799~determination of symmetry	6	0.559701	0.0984753	DNAH11, NOTCH2, DISP1, PKD2, RFX3, ZIC3	778	43	13528	2.42626	1	0.815347	84.5176
GOTERM_BP_FAT	GO:0043009~chordate embryonic development	26	2.42537	0.0988319	SOX8, TCF7L2, ZIC2, DAB2, GRIN2B, SLC30A1, GATA6, PKD2, MKL2, ALX4, ALX1, CUBN, C2CD3, EPAS1, DLL3, BRCA2, PCDH8, SIX4, PROX1, CCNB2, EP300, MSX1, SFRP1, NCOA6, ZIC5, ZFPM2	778	331	13528	1.36584	1	0.814835	84.6275
GOTERM_BP_FAT	GO:0042446~hormone biosynthetic process	5	0.466418	0.099543	DIO3, CHST9, HSD11B2, HFE, TPO	778	31	13528	2.80454	1	0.815502	84.8443
GOTERM_BP_FAT	GO:0001822~kidney development	10	0.932836	0.0997512	AGTR1, SPRY1, ITGA8, ARID5B, FBN1, PKD2, ZBTB16, CA2, BMP7, PROX1	778	96	13528	1.81127	1	0.814506	84.9072

## Sheet: Y300-Y180_up
Category	Term	Count	%	PValue	Genes	List Total	Pop Hits	Pop Total	Fold Enrichment	Bonferroni	Benjamini	FDR
GOTERM_BP_FAT	GO:0007005~mitochondrion organization	11	3.7931	4.90259e-05	SPG7, TSPO, MRPL12, CCK, NDUFS4, TOMM7, TOMM40, TIMM13, SDHAF1, TIMM8B, IFI6	207	138	13528	5.20927	0.0675705	0.0675705	0.0809359
GOTERM_BP_FAT	GO:0070585~protein localization in mitochondrion	5	1.72414	0.00169325	TSPO, TOMM7, TOMM40, TIMM13, TIMM8B	207	34	13528	9.61068	0.910928	0.701551	2.75998
GOTERM_BP_FAT	GO:0006626~protein targeting to mitochondrion	5	1.72414	0.00169325	TSPO, TOMM7, TOMM40, TIMM13, TIMM8B	207	34	13528	9.61068	0.910928	0.701551	2.75998
GOTERM_BP_FAT	GO:0042254~ribosome biogenesis	8	2.75862	0.00262434	EXOSC6, RPS16, SURF6, TSR2, EXOSC4, EXOSC5, EXOSC3, MRTO4	207	122	13528	4.28542	0.976479	0.713482	4.247
GOTERM_BP_FAT	GO:0010948~negative regulation of cell cycle process	4	1.37931	0.00625211	CHMP1A, MAD2L1, CENPE, GAS1	207	25	13528	10.4564	0.99987	0.893269	9.83945
GOTERM_BP_FAT	GO:0022613~ribonucleoprotein complex biogenesis	9	3.10345	0.00641248	TARBP2, EXOSC6, RPS16, SURF6, TSR2, EXOSC4, EXOSC5, EXOSC3, MRTO4	207	180	13528	3.26763	0.999897	0.840548	10.0794
GOTERM_BP_FAT	GO:0006364~rRNA processing	6	2.06897	0.013174	EXOSC6, RPS16, TSR2, EXOSC4, EXOSC5, EXOSC3	207	92	13528	4.26213	1	0.95732	19.669
GOTERM_BP_FAT	GO:0016072~rRNA metabolic process	6	2.06897	0.0156018	EXOSC6, RPS16, TSR2, EXOSC4, EXOSC5, EXOSC3	207	96	13528	4.08454	1	0.959465	22.8714
GOTERM_BP_FAT	GO:0009264~deoxyribonucleotide catabolic process	3	1.03448	0.0186174	NUDT1, NTHL1, NT5C	207	14	13528	14.0041	1	0.964992	26.6821
GOTERM_BP_FAT	GO:0044270~nitrogen compound catabolic process	5	1.72414	0.0189868	TST, NUDT1, NTHL1, ENTPD2, NT5C	207	67	13528	4.87706	1	0.952137	27.1366
GOTERM_BP_FAT	GO:0006839~mitochondrial transport	5	1.72414	0.0209219	TSPO, TOMM7, TOMM40, TIMM13, TIMM8B	207	69	13528	4.7357	1	0.951064	29.4743
GOTERM_BP_FAT	GO:0006091~generation of precursor metabolites and energy	11	3.7931	0.0217383	NDUFS6, CYBA, NDUFS4, COX7A1, SURF1, ATP5G3, ETFB, ATP6V0B, NDUFA11, ACAA1, NDUFB2	207	313	13528	2.29674	1	0.942223	30.4393
GOTERM_BP_FAT	GO:0007346~regulation of mitotic cell cycle	7	2.41379	0.0288357	CHMP1A, MAD2L1, CENPE, E4F1, GAS1, LTB, NFKBIL1	207	152	13528	3.00966	1	0.969176	38.3209
GOTERM_BP_FAT	GO:0022900~electron transport chain	6	2.06897	0.0301763	NDUFS6, CYBA, NDUFS4, ETFB, NDUFA11, NDUFB2	207	114	13528	3.43961	1	0.965384	39.7121
GOTERM_BP_FAT	GO:0010564~regulation of cell cycle process	6	2.06897	0.0301763	CHMP1A, MAD2L1, CENPE, GAS1, LTB, NFKBIL1	207	114	13528	3.43961	1	0.965384	39.7121
GOTERM_BP_FAT	GO:0045786~negative regulation of cell cycle	5	1.72414	0.0350326	CHMP1A, MAD2L1, HEXIM2, CENPE, GAS1	207	81	13528	4.03411	1	0.973613	44.5087
GOTERM_BP_FAT	GO:0055114~oxidation reduction	17	5.86207	0.0350755	GPD1, QDPR, PRDX5, DHRS7B, COQ7, NDUFB2, NDUFA11, NDUFS6, CYBA, NDUFS4, DOHH, FOXRED1, CCS, SURF1, ETFB, DCXR, RDH13	207	639	13528	1.73865	1	0.966519	44.5494
GOTERM_BP_FAT	GO:0009394~2'-deoxyribonucleotide metabolic process	3	1.03448	0.0400817	NUDT1, NTHL1, NT5C	207	21	13528	9.33609	1	0.973967	49.1141
GOTERM_BP_FAT	GO:0009166~nucleotide catabolic process	4	1.37931	0.0424937	NUDT1, NTHL1, ENTPD2, NT5C	207	51	13528	5.1257	1	0.973878	51.1851
GOTERM_BP_FAT	GO:0033043~regulation of organelle organization	8	2.75862	0.0484513	ARPC1B, MAD2L1, STMN3, ARPC5L, CAPG, CENPE, LTB, NFKBIL1	207	217	13528	2.40931	1	0.980499	55.9661
GOTERM_BP_FAT	GO:0017038~protein import	6	2.06897	0.0499385	TSPO, TOMM7, PEX16, TOMM40, TIMM13, TIMM8B	207	131	13528	2.99325	1	0.978668	57.0891
GOTERM_BP_FAT	GO:0009968~negative regulation of signal transduction	8	2.75862	0.0524812	MDFI, STMN3, DLL3, CIDEA, SOX17, GAS1, PHLDA3, RGS9BP	207	221	13528	2.36571	1	0.978643	58.9469
GOTERM_BP_FAT	GO:0051783~regulation of nuclear division	4	1.37931	0.0535648	MAD2L1, CENPE, LTB, NFKBIL1	207	56	13528	4.66805	1	0.976269	59.7154
GOTERM_BP_FAT	GO:0007088~regulation of mitosis	4	1.37931	0.0535648	MAD2L1, CENPE, LTB, NFKBIL1	207	56	13528	4.66805	1	0.976269	59.7154
GOTERM_BP_FAT	GO:0034622~cellular macromolecular complex assembly	10	3.44828	0.054678	CYBA, HIST2H2AB, TARBP2, NDUFS4, PFDN6, CENPE, H2AFJ, HIST2H4A, SURF1, SDHAF1	207	318	13528	2.05512	1	0.973938	60.4908
GOTERM_BP_FAT	GO:0006801~superoxide metabolic process	3	1.03448	0.0550481	CYBA, CCS, MT3	207	25	13528	7.84232	1	0.970192	60.7455
GOTERM_BP_FAT	GO:0045840~positive regulation of mitosis	3	1.03448	0.0550481	CENPE, LTB, NFKBIL1	207	25	13528	7.84232	1	0.970192	60.7455
GOTERM_BP_FAT	GO:0051785~positive regulation of nuclear division	3	1.03448	0.0550481	CENPE, LTB, NFKBIL1	207	25	13528	7.84232	1	0.970192	60.7455
GOTERM_BP_FAT	GO:0034656~nucleobase, nucleoside and nucleotide catabolic process	4	1.37931	0.0583436	NUDT1, NTHL1, ENTPD2, NT5C	207	58	13528	4.50708	1	0.971966	62.9463
GOTERM_BP_FAT	GO:0034655~nucleobase, nucleoside, nucleotide and nucleic acid catabolic process	4	1.37931	0.0583436	NUDT1, NTHL1, ENTPD2, NT5C	207	58	13528	4.50708	1	0.971966	62.9463
GOTERM_BP_FAT	GO:0031648~protein destabilization	2	0.689655	0.0595399	SOX17, ISOC2	207	4	13528	32.6763	1	0.969921	63.7161
GOTERM_BP_FAT	GO:0002037~negative regulation of L-glutamate transport	2	0.689655	0.0595399	LTB, NFKBIL1	207	4	13528	32.6763	1	0.969921	63.7161
GOTERM_BP_FAT	GO:0018130~heterocycle biosynthetic process	4	1.37931	0.060806	TSPO, PCBD2, QDPR, APRT	207	59	13528	4.43069	1	0.968034	64.5144
GOTERM_BP_FAT	GO:0006119~oxidative phosphorylation	5	1.72414	0.0625548	NDUFS6, NDUFS4, ATP5G3, ATP6V0B, NDUFB2	207	98	13528	3.33432	1	0.967093	65.5901
GOTERM_BP_FAT	GO:0009262~deoxyribonucleotide metabolic process	3	1.03448	0.0631551	NUDT1, NTHL1, NT5C	207	27	13528	7.26141	1	0.96402	65.9522
GOTERM_BP_FAT	GO:0034470~ncRNA processing	7	2.41379	0.0675301	TARBP2, EXOSC6, RPS16, TSR2, EXOSC4, EXOSC5, EXOSC3	207	187	13528	2.44636	1	0.96795	68.4851
GOTERM_BP_FAT	GO:0002036~regulation of L-glutamate transport	2	0.689655	0.0738652	LTB, NFKBIL1	207	5	13528	26.1411	1	0.97401	71.8407
GOTERM_BP_FAT	GO:0034614~cellular response to reactive oxygen species	3	1.03448	0.0760071	ROMO1, PRDX5, MT3	207	30	13528	6.53527	1	0.973719	72.8972
GOTERM_BP_FAT	GO:0045638~negative regulation of myeloid cell differentiation	3	1.03448	0.0760071	NME2, LMO2, NME1, HIST2H4A	207	30	13528	6.53527	1	0.973719	72.8972
GOTERM_BP_FAT	GO:0045859~regulation of protein kinase activity	10	3.44828	0.0816828	MDFI, TRAF2, TARBP2, CCK, HEXIM2, CXCR4, ADRA2C, CENPE, PKIB, SERTAD1	207	345	13528	1.89428	1	0.977628	75.5194
GOTERM_BP_FAT	GO:0006800~oxygen and reactive oxygen species metabolic process	4	1.37931	0.0821837	CYBA, NDUFS4, CCS, MT3	207	67	13528	3.90165	1	0.975483	75.739
GOTERM_BP_FAT	GO:0065003~macromolecular complex assembly	16	5.51724	0.083269	TRAF2, HRAS, POLR2E, PCBD2, CENPE, H2AFJ, HIST2H4A, SDHAF1, TARBP2, HIST2H2AB, CYBA, NDUFS4, PFDN6, CAPG, SURF1, NAT14	207	665	13528	1.57239	1	0.973982	76.2085
GOTERM_BP_FAT	GO:0010648~negative regulation of cell communication	8	2.75862	0.0854096	MDFI, STMN3, DLL3, CIDEA, SOX17, GAS1, PHLDA3, RGS9BP	207	248	13528	2.10815	1	0.973748	77.1095
GOTERM_BP_FAT	GO:0006729~tetrahydrobiopterin biosynthetic process	2	0.689655	0.0879733	PCBD2, QDPR	207	6	13528	21.7842	1	0.974014	78.1465
GOTERM_BP_FAT	GO:0045039~protein import into mitochondrial inner membrane	2	0.689655	0.0879733	TIMM13, TIMM8B	207	6	13528	21.7842	1	0.974014	78.1465
GOTERM_BP_FAT	GO:0033540~fatty acid beta-oxidation using acyl-CoA oxidase	2	0.689655	0.0879733	ACOT8, ACAA1	207	6	13528	21.7842	1	0.974014	78.1465
GOTERM_BP_FAT	GO:0051956~negative regulation of amino acid transport	2	0.689655	0.0879733	LTB, NFKBIL1	207	6	13528	21.7842	1	0.974014	78.1465
GOTERM_BP_FAT	GO:0044070~regulation of anion transport	2	0.689655	0.0879733	LTB, NFKBIL1	207	6	13528	21.7842	1	0.974014	78.1465
GOTERM_BP_FAT	GO:0006612~protein targeting to membrane	3	1.03448	0.0896011	PEX16, TIMM13, TIMM8B	207	33	13528	5.94115	1	0.973229	78.7818
GOTERM_BP_FAT	GO:0046324~regulation of glucose import	3	1.03448	0.0896011	CAPN10, LTB, NFKBIL1	207	33	13528	5.94115	1	0.973229	78.7818
GOTERM_BP_FAT	GO:0045637~regulation of myeloid cell differentiation	4	1.37931	0.0909287	NME2, ESRRA, LMO2, NME1, HIST2H4A	207	70	13528	3.73444	1	0.972123	79.2871
GOTERM_BP_FAT	GO:0010827~regulation of glucose transport	3	1.03448	0.0942812	CAPN10, LTB, NFKBIL1	207	34	13528	5.76641	1	0.973307	80.5131
GOTERM_BP_FAT	GO:0034621~cellular macromolecular complex subunit organization	10	3.44828	0.0963874	CYBA, HIST2H2AB, TARBP2, NDUFS4, PFDN6, CENPE, H2AFJ, HIST2H4A, SURF1, SDHAF1	207	357	13528	1.83061	1	0.973105	81.2482
GOTERM_BP_FAT	GO:0043549~regulation of kinase activity	10	3.44828	0.0963874	MDFI, TRAF2, TARBP2, CCK, HEXIM2, CXCR4, ADRA2C, CENPE, PKIB, SERTAD1	207	357	13528	1.83061	1	0.973105	81.2482

## Sheet: Y300-Y180_down
Category	Term	Count	%	PValue	Genes	List Total	Pop Hits	Pop Total	Fold Enrichment	Bonferroni	Benjamini	FDR
GOTERM_BP_FAT	GO:0045449~regulation of transcription	138	26.2357	2.3565e-12	STK36, ZNF827, CNOT3, PDLIM1, FOXO3, CNOT6, GATA6, SMARCD1, CREB3L2, SATB1, L3MBTL4, RCOR1, ZHX2, MED14, ARID1A, ARID1B, PPARGC1A, PROX1, TRERF1, ZNF37A, EP300, PIAS2, CRTC3, TSHZ3, SETD1B, CRTC1, ONECUT2, ELK3, TRRAP, SOX9, ZNF618, MED12L, PLAGL1, TRIM66, TCERG1, ATN1, TEAD4, CASZ1, BHLHE40, RUNX1, PLAGL2, KLF5, IKZF5, PLAG1, ASXL3, IKZF4, TCF7, IKZF3, TAF3, EPAS1, RFX7, ASXL1, CREBBP, MAML2, BR…	409	2601	13528	1.75489	5.0805e-09	5.0805e-09	4.08702e-09
GOTERM_BP_FAT	GO:0045893~positive regulation of transcription, DNA-dependent	47	8.93536	2.44378e-12	ELF4, CRTC1, ONECUT2, FOXO3, SOX9, GLI2, TCF7L2, SKAP1, PLAGL1, NPAS2, REL, GATA6, SMARCD1, TEAD4, NFAT5, MKL2, NR2F2, NFATC2, RUNX1, SERTAD2, PLAGL2, ATF7IP, EPAS1, FOXJ2, CREBBP, MAML2, TEAD1, ARID1A, CREB5, MED14, TEAD3, ARID1B, AFF1, PROX1, TRERF1, PPARGC1A, EP300, NCOA2, BPTF, ZMIZ1, ATXN7, HIPK2, NCOA6, ZFPM2, PIAS2, ZNF462, NFIB	409	477	13528	3.25904	5.26888e-09	2.63444e-09	4.23857e-09
GOTERM_BP_FAT	GO:0051254~positive regulation of RNA metabolic process	47	8.93536	3.34094e-12	ELF4, CRTC1, ONECUT2, FOXO3, SOX9, GLI2, TCF7L2, SKAP1, PLAGL1, NPAS2, REL, GATA6, SMARCD1, TEAD4, NFAT5, MKL2, NR2F2, NFATC2, RUNX1, SERTAD2, PLAGL2, ATF7IP, EPAS1, FOXJ2, CREBBP, MAML2, TEAD1, ARID1A, CREB5, MED14, TEAD3, ARID1B, AFF1, PROX1, TRERF1, PPARGC1A, EP300, NCOA2, BPTF, ZMIZ1, ATXN7, HIPK2, NCOA6, ZFPM2, PIAS2, ZNF462, NFIB	409	481	13528	3.23194	7.20318e-09	2.40106e-09	5.79461e-09
GOTERM_BP_FAT	GO:0006350~transcription	118	22.4335	5.60719e-12	ZNF827, CNOT3, FOXO3, CNOT6, GATA6, CREB3L2, RCOR1, ZHX2, MED14, ARID1A, ARID1B, PROX1, TRERF1, PPARGC1A, ZNF37A, EP300, PIAS2, CRTC3, TSHZ3, CRTC1, SETD1B, ONECUT2, ELK3, TRRAP, SOX9, ZNF618, MED12L, PLAGL1, TCERG1, TEAD4, CASZ1, BHLHE40, RUNX1, PLAGL2, IKZF5, PLAG1, KLF5, ASXL3, IKZF4, TCF7, IKZF3, TAF3, EPAS1, ASXL1, MAML2, CREBBP, ARID3B, TEAD1, TEAD3, ZFHX4, SAP130, SALL1, HIVEP3, HIVEP2, ZN…	409	2101	13528	1.85766	1.20891e-08	3.02227e-09	9.72508e-09
GOTERM_BP_FAT	GO:0010628~positive regulation of gene expression	51	9.69582	1.77052e-11	ELF4, FOXO3, GLI2, GLI3, SKAP1, GATA6, SMARCD1, MKL2, NR2F2, SERTAD2, ATF7IP, FOXJ2, ARID1A, MED14, ARID1B, TRERF1, PPARGC1A, PROX1, NCOA2, EP300, BPTF, ZMIZ1, HIPK2, NCOA6, PIAS2, ZFPM2, CRTC1, ONECUT2, SOX9, TCF7L2, PLAGL1, NPAS2, REL, TEAD4, NFAT5, RUNX1, NFATC2, PLAGL2, KLF5, IL2RB, EPAS1, MAML2, CREBBP, TEAD1, CREB5, TEAD3, AFF1, ATXN7, HIVEP3, ZNF462, NFIB	409	581	13528	2.90338	3.81723e-08	7.63447e-09	3.07078e-08
GOTERM_BP_FAT	GO:0045941~positive regulation of transcription	50	9.5057	2.05865e-11	ELF4, FOXO3, GLI2, GLI3, SKAP1, GATA6, SMARCD1, MKL2, NR2F2, SERTAD2, ATF7IP, FOXJ2, ARID1A, MED14, ARID1B, TRERF1, PPARGC1A, PROX1, NCOA2, EP300, BPTF, ZMIZ1, HIPK2, NCOA6, PIAS2, ZFPM2, CRTC1, ONECUT2, SOX9, TCF7L2, PLAGL1, NPAS2, REL, TEAD4, NFAT5, RUNX1, NFATC2, PLAGL2, KLF5, EPAS1, MAML2, CREBBP, TEAD1, CREB5, TEAD3, AFF1, ATXN7, HIVEP3, ZNF462, NFIB	409	564	13528	2.93225	4.43846e-08	7.39743e-09	3.57052e-08
GOTERM_BP_FAT	GO:0045935~positive regulation of nucleobase, nucleoside, nucleotide and nucleic acid metabolic process	52	9.88593	7.22177e-11	ELF4, FOXO3, GLI2, GLI3, SKAP1, GATA6, SMARCD1, MKL2, NR2F2, SERTAD2, ATF7IP, FOXJ2, ARID1A, MED14, PRKCG, ARID1B, TRERF1, PPARGC1A, PROX1, NCOA2, EP300, BPTF, ZMIZ1, HIPK2, NCOA6, ZFPM2, PIAS2, CRTC1, ONECUT2, SOX9, TCF7L2, PLAGL1, IGF1R, NPAS2, REL, TEAD4, NFAT5, RUNX1, NFATC2, PLAGL2, KLF5, EPAS1, MAML2, CREBBP, TEAD1, CREB5, TEAD3, AFF1, ATXN7, HIVEP3, ZNF462, NFIB	409	624	13528	2.75632	1.55701e-07	2.2243e-08	1.25254e-07
GOTERM_BP_FAT	GO:0051173~positive regulation of nitrogen compound metabolic process	53	10.076	7.25834e-11	ELF4, FOXO3, GLI2, GLI3, SKAP1, GATA6, SMARCD1, MKL2, NR2F2, DDAH1, SERTAD2, ATF7IP, FOXJ2, PRKCG, ARID1A, MED14, ARID1B, TRERF1, PPARGC1A, PROX1, NCOA2, EP300, BPTF, ZMIZ1, HIPK2, NCOA6, ZFPM2, PIAS2, CRTC1, ONECUT2, SOX9, TCF7L2, PLAGL1, IGF1R, NPAS2, REL, TEAD4, NFAT5, RUNX1, NFATC2, PLAGL2, KLF5, EPAS1, MAML2, CREBBP, TEAD1, CREB5, TEAD3, AFF1, ATXN7, HIVEP3, ZNF462, NFIB	409	644	13528	2.72208	1.5649e-07	1.95612e-08	1.25888e-07
GOTERM_BP_FAT	GO:0010557~positive regulation of macromolecule biosynthetic process	52	9.88593	3.87438e-10	ELF4, FOXO3, GLI2, GLI3, SKAP1, GATA6, SMARCD1, MKL2, NR2F2, SERTAD2, ATF7IP, FOXJ2, ARID1A, MED14, ARID1B, TRERF1, PPARGC1A, PROX1, NCOA2, EP300, BPTF, ZMIZ1, HIPK2, NCOA6, ZFPM2, PIAS2, CRTC1, ONECUT2, SOX9, TCF7L2, PLAGL1, IGF1R, NPAS2, REL, TEAD4, NFAT5, RUNX1, NFATC2, PLAGL2, KLF5, EPAS1, MAML2, CREBBP, TEAD1, ITGA2, CREB5, TEAD3, AFF1, ATXN7, HIVEP3, ZNF462, NFIB	409	654	13528	2.62988	8.35317e-07	9.2813e-08	6.71972e-07
GOTERM_BP_FAT	GO:0031328~positive regulation of cellular biosynthetic process	53	10.076	6.6538e-10	ELF4, FOXO3, GLI2, GLI3, SKAP1, GATA6, SMARCD1, MKL2, NR2F2, DDAH1, SERTAD2, ATF7IP, FOXJ2, ARID1A, MED14, ARID1B, TRERF1, PPARGC1A, PROX1, NCOA2, EP300, BPTF, ZMIZ1, HIPK2, NCOA6, ZFPM2, PIAS2, CRTC1, ONECUT2, SOX9, TCF7L2, PLAGL1, IGF1R, NPAS2, REL, TEAD4, NFAT5, RUNX1, NFATC2, PLAGL2, KLF5, EPAS1, MAML2, CREBBP, TEAD1, ITGA2, CREB5, TEAD3, AFF1, ATXN7, HIVEP3, ZNF462, NFIB	409	685	13528	2.55915	1.43456e-06	1.43456e-07	1.15403e-06
GOTERM_BP_FAT	GO:0009891~positive regulation of biosynthetic process	53	10.076	1.10952e-09	ELF4, FOXO3, GLI2, GLI3, SKAP1, GATA6, SMARCD1, MKL2, NR2F2, DDAH1, SERTAD2, ATF7IP, FOXJ2, ARID1A, MED14, ARID1B, TRERF1, PPARGC1A, PROX1, NCOA2, EP300, BPTF, ZMIZ1, HIPK2, NCOA6, ZFPM2, PIAS2, CRTC1, ONECUT2, SOX9, TCF7L2, PLAGL1, IGF1R, NPAS2, REL, TEAD4, NFAT5, RUNX1, NFATC2, PLAGL2, KLF5, EPAS1, MAML2, CREBBP, TEAD1, ITGA2, CREB5, TEAD3, AFF1, ATXN7, HIVEP3, ZNF462, NFIB	409	695	13528	2.52233	2.39213e-06	2.17467e-07	1.92436e-06
GOTERM_BP_FAT	GO:0006357~regulation of transcription from RNA polymerase II promoter	54	10.2662	1.8739e-09	ELF4, PAX5, FOXO3, GLI2, SKAP1, GFI1B, GATA6, SMARCD1, MKL2, NR2F2, ATF7IP, SATB1, SLA2, ZHX2, MED14, SPEN, PPARGC1A, PROX1, NCOA2, EP300, BPTF, ZMIZ1, HIPK2, NCOA6, ZFPM2, KDM6B, SUPT3H, CRTC1, ONECUT2, SOX9, TCF7L2, MED12L, PLAGL1, NPAS2, ATN1, TEAD4, NFAT5, RUNX1, NFATC2, PLAGL2, IKZF3, TCF7, EPAS1, MAML2, CREBBP, TEAD1, TEAD3, SP2, ATXN7, HIVEP1, ZNF462, ZFHX3, NCOR2, NFIB	409	727	13528	2.4568	4.04012e-06	3.36677e-07	3.25009e-06
GOTERM_BP_FAT	GO:0006355~regulation of transcription, DNA-dependent	93	17.6806	7.49439e-08	ELF4, PRRX1, PAX5, FOXO3, GLI2, SKAP1, GFI1B, GATA6, SMARCD1, CREB3L2, MKL2, NR2F2, SERTAD2, ATF7IP, SATB1, L3MBTL4, FOXJ2, SLA2, ZHX2, ADNP, MED14, ARID1A, SPEN, ARID1B, PROX1, PPARGC1A, TRERF1, ZNF37A, EP300, NCOA2, BPTF, ZMIZ1, HIPK2, NCOA6, KCNH7, ZFPM2, KCNH8, ZNF713, PIAS2, KDM6B, SUPT3H, TSHZ3, CRTC1, ONECUT2, NFIX, ELK3, SOX9, TCF7L2, SUFU, MED12L, PLAGL1, NPAS2, STAT4, TRIM66, NPAS3, REL…	409	1773	13528	1.73494	0.000161566	1.24291e-05	0.000129983
GOTERM_BP_FAT	GO:0010604~positive regulation of macromolecule metabolic process	56	10.6464	7.82043e-08	ELF4, FOXO3, GLI2, GLI3, SKAP1, GATA6, SMARCD1, MKL2, NR2F2, SERTAD2, ATF7IP, FOXJ2, PRKCG, ARID1A, MED14, ARID1B, TRERF1, PPARGC1A, PROX1, NCOA2, EP300, BPTF, ZMIZ1, HIPK2, NCOA6, ZFPM2, PIAS2, CRTC1, ONECUT2, PML, SOX9, TCF7L2, PLAGL1, IGF1R, NPAS2, REL, TEAD4, NFAT5, RUNX1, NFATC2, PLAGL2, KLF5, IL2RB, EPAS1, MAML2, CREBBP, TEAD1, ITGA2, CREB5, TEAD3, AFF1, CBLB, ATXN7, HIVEP3, ZNF462, NFIB	409	857	13528	2.16131	0.000168594	1.20434e-05	0.000135637
GOTERM_BP_FAT	GO:0045944~positive regulation of transcription from RNA polymerase II promoter	33	6.27376	9.01122e-08	ELF4, CRTC1, ONECUT2, FOXO3, GLI2, SOX9, SKAP1, TCF7L2, PLAGL1, NPAS2, GATA6, TEAD4, NFAT5, MKL2, NFATC2, RUNX1, PLAGL2, EPAS1, CREBBP, MAML2, TEAD1, MED14, TEAD3, PPARGC1A, NCOA2, EP300, ZMIZ1, ATXN7, HIPK2, NCOA6, ZFPM2, ZNF462, NFIB	409	371	13528	2.94205	0.000194263	1.2952e-05	0.00015629
GOTERM_BP_FAT	GO:0051252~regulation of RNA metabolic process	94	17.8707	1.06507e-07	ELF4, PRRX1, PAX5, FOXO3, GLI2, SKAP1, GFI1B, GATA6, SMARCD1, CREB3L2, MKL2, NR2F2, SERTAD2, ATF7IP, SATB1, L3MBTL4, FOXJ2, SLA2, ZHX2, ADNP, MED14, ARID1A, SPEN, ARID1B, PROX1, PPARGC1A, TRERF1, ZNF37A, EP300, NCOA2, BPTF, ZMIZ1, HIPK2, NCOA6, KCNH7, ZFPM2, KCNH8, ZNF713, PIAS2, KDM6B, SUPT3H, TSHZ3, CRTC1, ONECUT2, NFIX, ELK3, SOX9, TCF7L2, SUFU, MED12L, ZFP36L1, PLAGL1, NPAS2, STAT4, TRIM66, N…	409	1813	13528	1.71491	0.000229604	1.43518e-05	0.000184726
GOTERM_BP_FAT	GO:0006796~phosphate metabolic process	55	10.4563	9.05106e-06	CDK18, STK36, SYNJ1, CTTNBP2, PSKH1, MAP3K4, PAK2, AAK1, GAB1, BRD4, ATP8, FRS2, SIK3, ATP6, ND1, ND4, MADD, ND5, PTPRG, ND2, ND3, WNK1, PRKCG, CDK6, PTPRT, WNK2, PTPRN, ALK, MARK4, MAST1, KSR2, HIPK2, RELN, EIF2AK4, SSH1, SSH2, PFKFB1, PML, CYTB, TRIB1, IGF1R, STAT4, MTMR1, ADRA2B, ITK, PTPRD, FLT1, ALPK2, PTPN14, PTPN12, NTRK3, ND4L, COX3, PRLR, PLK2, ULK1, COX2, ABL2	409	973	13528	1.86965	0.019325	0.00114723	0.015697
GOTERM_BP_FAT	GO:0006793~phosphorus metabolic process	55	10.4563	9.05106e-06	CDK18, STK36, SYNJ1, CTTNBP2, PSKH1, MAP3K4, PAK2, AAK1, GAB1, BRD4, ATP8, FRS2, SIK3, ATP6, ND1, ND4, MADD, ND5, PTPRG, ND2, ND3, WNK1, PRKCG, CDK6, PTPRT, WNK2, PTPRN, ALK, MARK4, MAST1, KSR2, HIPK2, RELN, EIF2AK4, SSH1, SSH2, PFKFB1, PML, CYTB, TRIB1, IGF1R, STAT4, MTMR1, ADRA2B, ITK, PTPRD, FLT1, ALPK2, PTPN14, PTPN12, NTRK3, ND4L, COX3, PRLR, PLK2, ULK1, COX2, ABL2	409	973	13528	1.86965	0.019325	0.00114723	0.015697
GOTERM_BP_FAT	GO:0000904~cell morphogenesis involved in differentiation	21	3.9924	5.07687e-05	DRD2, MAP1B, NFASC, STXBP1, CELSR2, L1CAM, GLI2, SOX9, PROX1, SLITRK2, SEMA6A, IGF1R, DAB2, ULK1, CNTN2, RELN, APBB2, CACNA1A, DSCAM, NFATC1, FN1	409	244	13528	2.84669	0.103682	0.00606266	0.0880166
GOTERM_BP_FAT	GO:0016310~phosphorylation	45	8.55513	7.9963e-05	CDK18, STK36, PFKFB1, PML, CYTB, TRIB1, CTTNBP2, IGF1R, STAT4, PSKH1, MAP3K4, PAK2, AAK1, GAB1, ADRA2B, BRD4, ATP8, FRS2, SIK3, ATP6, ITK, ND1, FLT1, ND4, ALPK2, MADD, ND5, ND2, ND3, WNK1, CDK6, PRKCG, WNK2, ALK, MARK4, NTRK3, ND4L, MAST1, KSR2, PRLR, COX3, PLK2, ULK1, COX2, HIPK2, RELN, ABL2, EIF2AK4	409	800	13528	1.86051	0.158363	0.00903301	0.138597
GOTERM_BP_FAT	GO:0032989~cellular component morphogenesis	27	5.13308	0.000178463	SHROOM3, SSH1, DRD2, ONECUT2, L1CAM, GLI2, SOX9, IGF1R, DAB2, ANK1, DSCAM, NFATC1, FN1, ACTA1, MAP1B, STXBP1, NFASC, CELSR2, PROX1, SLITRK2, SEMA6A, ULK1, CNTN2, RELN, APBB2, CACNA1A, TMOD1	409	397	13528	2.24949	0.319414	0.0190561	0.309075
GOTERM_BP_FAT	GO:0000902~cell morphogenesis	25	4.75285	0.000204176	SHROOM3, SSH1, DRD2, MAP1B, ONECUT2, NFASC, STXBP1, CELSR2, L1CAM, SOX9, GLI2, PROX1, SLITRK2, IGF1R, SEMA6A, DAB2, ANK1, ULK1, CNTN2, RELN, APBB2, CACNA1A, FN1, NFATC1, DSCAM	409	356	13528	2.32274	0.356123	0.020746	0.353532
GOTERM_BP_FAT	GO:0022610~biological adhesion	39	7.41445	0.000330889	CLSTN2, MYBPC1, ASTN1, ITGA11, FERMT1, PCDHGC5, L1CAM, SOX9, SDC3, CD47, CD96, FAT3, FAT4, ZYX, DSCAM, FN1, PCDHB7, PCDHB6, LPP, NFASC, STXBP1, F8, ITGA2, PTPRT, NLGN3, CELSR2, ACTN2, PCDH17, PCDH19, PCDHGB5, NCAM1, JUP, CD84, LAMA3, CNTN2, RELN, ABL2, CD226, ITGA2B	409	701	13528	1.84017	0.51008	0.0319122	0.572343
GOTERM_BP_FAT	GO:0007155~cell adhesion	39	7.41445	0.000332303	CLSTN2, MYBPC1, ASTN1, ITGA11, FERMT1, PCDHGC5, L1CAM, SOX9, SDC3, CD47, CD96, FAT3, FAT4, ZYX, DSCAM, FN1, PCDHB7, PCDHB6, LPP, NFASC, STXBP1, F8, ITGA2, PTPRT, NLGN3, CELSR2, ACTN2, PCDH17, PCDH19, PCDHGB5, NCAM1, JUP, CD84, LAMA3, CNTN2, RELN, ABL2, CD226, ITGA2B	409	700	13528	1.84279	0.511573	0.0306747	0.574784
GOTERM_BP_FAT	GO:0045892~negative regulation of transcription, DNA-dependent	24	4.56274	0.000502838	ATF7IP, SATB1, SLA2, ZHX2, PAX5, SPEN, PHF12, GLI2, SOX9, PROX1, TRIM66, NCOA2, GFI1B, ATN1, BPTF, HIPK2, ZFPM2, HIVEP1, BHLHE40, NR2F2, ZFHX3, BAZ2A, KDM6B, NCOR2	409	356	13528	2.22983	0.661893	0.0441774	0.868547
GOTERM_BP_FAT	GO:0007156~homophilic cell adhesion	13	2.47148	0.000601622	CD84, PCDHB7, CLSTN2, FAT3, FAT4, PCDHB6, PCDHGC5, PTPRT, L1CAM, CELSR2, PCDH17, PCDHGB5, PCDH19	409	131	13528	3.28233	0.726783	0.0505757	1.03834
GOTERM_BP_FAT	GO:0051253~negative regulation of RNA metabolic process	24	4.56274	0.00063414	ATF7IP, SATB1, SLA2, ZHX2, PAX5, SPEN, PHF12, GLI2, SOX9, PROX1, TRIM66, NCOA2, GFI1B, ATN1, BPTF, HIPK2, ZFPM2, HIVEP1, BHLHE40, NR2F2, ZFHX3, BAZ2A, KDM6B, NCOR2	409	362	13528	2.19287	0.745292	0.051242	1.09417
GOTERM_BP_FAT	GO:0022904~respiratory electron transport chain	9	1.71103	0.000645119	ND1, ND4L, ND4, COX3, ND5, COX2, ND2, ND3, CYTB, ATP8, PPARGC1A, ATP6	409	64	13528	4.65128	0.751254	0.0502254	1.11301
GOTERM_BP_FAT	GO:0010629~negative regulation of gene expression	30	5.70342	0.000667243	PML, PAX5, ELK3, GLI2, SOX9, GLI3, TRIM66, GFI1B, TNRC6C, ATN1, BHLHE40, TNRC6B, NR2F2, BAZ2A, ATF7IP, SATB1, ZCCHC11, SLA2, ZHX2, SPEN, PHF12, PROX1, NCOA2, BPTF, HIPK2, ZFPM2, HIVEP1, ZFHX3, KDM6B, NCOR2	409	504	13528	1.9688	0.762848	0.0500965	1.15098
GOTERM_BP_FAT	GO:0030030~cell projection organization	24	4.56274	0.000790732	KLF5, DNM3, FGD1, GNAO1, DRD2, MAP1B, WASF2, ONECUT2, NFASC, STXBP1, CELSR2, ACTN2, L1CAM, GLI2, SLITRK2, SEMA6A, IGF1R, ULK1, RASGRF1, CNTN2, RELN, APBB2, CACNA1A, DSCAM	409	368	13528	2.15712	0.818317	0.0571142	1.36262
GOTERM_BP_FAT	GO:0031327~negative regulation of cellular biosynthetic process	32	6.08365	0.000857785	PML, PAX5, ELK3, GLI2, SOX9, GLI3, TRIM66, GFI1B, EIF4EBP2, ATN1, BHLHE40, NR2F2, BAZ2A, ATF7IP, SATB1, SLA2, ZHX2, BRCA2, PHF12, SPEN, PROX1, NCOA2, BPTF, GRM7, HIPK2, ZFPM2, HIVEP1, ZFHX3, KDM6B, NCOR2, EIF2AK4, CACNA1A	409	561	13528	1.88668	0.842791	0.0598094	1.47736
GOTERM_BP_FAT	GO:0006468~protein amino acid phosphorylation	36	6.84411	0.00101284	CDK18, STK36, PML, TRIB1, CTTNBP2, IGF1R, STAT4, PSKH1, MAP3K4, PAK2, AAK1, GAB1, ADRA2B, BRD4, FRS2, SIK3, ITK, FLT1, MADD, ALPK2, WNK1, CDK6, PRKCG, WNK2, ALK, MARK4, NTRK3, MAST1, KSR2, PRLR, PLK2, ULK1, HIPK2, RELN, ABL2, EIF2AK4	409	667	13528	1.7852	0.8875	0.0680512	1.74221
GOTERM_BP_FAT	GO:0043009~chordate embryonic development	22	4.18251	0.00109727	SHROOM3, SYVN1, EPAS1, PRRX1, BRCA2, GLI2, PROX1, TCF7L2, GLI3, ZIC2, DAB2, EP300, GATA6, SFRP2, ZMIZ1, TEAD4, NCOA6, CHST11, ZFPM2, KIAA1217, PTCH1, MKL2	409	331	13528	2.19839	0.906239	0.0712996	1.88613
GOTERM_BP_FAT	GO:0009890~negative regulation of biosynthetic process	32	6.08365	0.00122036	PML, PAX5, ELK3, GLI2, SOX9, GLI3, TRIM66, GFI1B, EIF4EBP2, ATN1, BHLHE40, NR2F2, BAZ2A, ATF7IP, SATB1, SLA2, ZHX2, BRCA2, PHF12, SPEN, PROX1, NCOA2, BPTF, GRM7, HIPK2, ZFPM2, HIVEP1, ZFHX3, KDM6B, NCOR2, EIF2AK4, CACNA1A	409	573	13528	1.84716	0.928115	0.0766792	2.0956
GOTERM_BP_FAT	GO:0006816~calcium ion transport	13	2.47148	0.00122707	ATP2B4, DRD2, CACNG7, RYR3, ATP2A1, CACNA1G, GRIN2A, CACNA1E, ITPR3, CACNA1C, CACNA1D, CACNA1A, NFATC1	409	142	13528	3.02807	0.92915	0.0749048	2.10702
GOTERM_BP_FAT	GO:0009792~embryonic development ending in birth or egg hatching	22	4.18251	0.00122812	SHROOM3, SYVN1, EPAS1, PRRX1, BRCA2, GLI2, PROX1, TCF7L2, GLI3, ZIC2, DAB2, EP300, GATA6, SFRP2, ZMIZ1, TEAD4, NCOA6, CHST11, ZFPM2, KIAA1217, PTCH1, MKL2	409	334	13528	2.17865	0.929311	0.0729046	2.10881
GOTERM_BP_FAT	GO:0042775~mitochondrial ATP synthesis coupled electron transport	8	1.52091	0.00139741	ND1, ND4L, ND4, COX3, ND5, COX2, ND2, ND3, CYTB, ATP8, ATP6	409	56	13528	4.72511	0.95095	0.0803366	2.39618
GOTERM_BP_FAT	GO:0042773~ATP synthesis coupled electron transport	8	1.52091	0.00139741	ND1, ND4L, ND4, COX3, ND5, COX2, ND2, ND3, CYTB, ATP8, ATP6	409	56	13528	4.72511	0.95095	0.0803366	2.39618
GOTERM_BP_FAT	GO:0016481~negative regulation of transcription	27	5.13308	0.00157589	PML, PAX5, ELK3, GLI2, SOX9, GLI3, TRIM66, GFI1B, ATN1, BHLHE40, NR2F2, BAZ2A, ATF7IP, SATB1, SLA2, ZHX2, SPEN, PHF12, PROX1, NCOA2, BPTF, HIPK2, ZFPM2, HIVEP1, ZFHX3, KDM6B, NCOR2	409	459	13528	1.94563	0.966637	0.0878037	2.69831
GOTERM_BP_FAT	GO:0048667~cell morphogenesis involved in neuron differentiation	16	3.04183	0.00168437	DRD2, MAP1B, NFASC, STXBP1, CELSR2, L1CAM, GLI2, SLITRK2, SEMA6A, IGF1R, ULK1, CNTN2, RELN, APBB2, CACNA1A, DSCAM	409	209	13528	2.53212	0.973605	0.0912148	2.8815
GOTERM_BP_FAT	GO:0045934~negative regulation of nucleobase, nucleoside, nucleotide and nucleic acid metabolic process	29	5.51331	0.00177622	PML, PAX5, ELK3, GLI2, SOX9, GLI3, TRIM66, GFI1B, ATN1, BHLHE40, NR2F2, BAZ2A, ATF7IP, SATB1, SLA2, ZHX2, BRCA2, SPEN, PHF12, PROX1, NCOA2, BPTF, GRM7, HIPK2, ZFPM2, HIVEP1, ZFHX3, KDM6B, NCOR2	409	512	13528	1.87343	0.978354	0.0936053	3.03636
GOTERM_BP_FAT	GO:0030522~intracellular receptor-mediated signaling pathway	9	1.71103	0.00184494	FLT1, NCOA2, SLA2, NCOA6, PML, PIAS2, ARID1A, MED14, PPARGC1A	409	75	13528	3.9691	0.98134	0.0947408	3.15206
GOTERM_BP_FAT	GO:0031175~neuron projection development	18	3.42205	0.00195677	GNAO1, DRD2, MAP1B, NFASC, STXBP1, CELSR2, L1CAM, GLI2, SLITRK2, SEMA6A, IGF1R, ULK1, RASGRF1, CNTN2, RELN, APBB2, CACNA1A, DSCAM	409	256	13528	2.32564	0.985344	0.0978713	3.34008
GOTERM_BP_FAT	GO:0048812~neuron projection morphogenesis	16	3.04183	0.00202706	DRD2, MAP1B, NFASC, STXBP1, CELSR2, L1CAM, GLI2, SLITRK2, SEMA6A, IGF1R, ULK1, CNTN2, RELN, APBB2, CACNA1A, DSCAM	409	213	13528	2.48457	0.987409	0.0989201	3.45809
GOTERM_BP_FAT	GO:0051172~negative regulation of nitrogen compound metabolic process	29	5.51331	0.00218193	PML, PAX5, ELK3, GLI2, SOX9, GLI3, TRIM66, GFI1B, ATN1, BHLHE40, NR2F2, BAZ2A, ATF7IP, SATB1, SLA2, ZHX2, BRCA2, SPEN, PHF12, PROX1, NCOA2, BPTF, GRM7, HIPK2, ZFPM2, HIVEP1, ZFHX3, KDM6B, NCOR2	409	519	13528	1.84817	0.99099	0.103736	3.71761
GOTERM_BP_FAT	GO:0007224~smoothened signaling pathway	5	0.95057	0.00220497	HIPK2, PTCH1, HHIP, GLI2, GLI3	409	19	13528	8.70416	0.991427	0.102518	3.75615
GOTERM_BP_FAT	GO:0010558~negative regulation of macromolecule biosynthetic process	30	5.70342	0.00234703	PML, PAX5, ELK3, GLI2, SOX9, GLI3, TRIM66, GFI1B, EIF4EBP2, ATN1, BHLHE40, NR2F2, BAZ2A, ATF7IP, SATB1, SLA2, ZHX2, BRCA2, SPEN, PHF12, PROX1, NCOA2, BPTF, HIPK2, ZFPM2, HIVEP1, ZFHX3, KDM6B, NCOR2, EIF2AK4	409	547	13528	1.81403	0.993693	0.106475	3.99354
GOTERM_BP_FAT	GO:0030879~mammary gland development	8	1.52091	0.00278446	IGF1R, CTTNBP2, PRLR, BRCA2, ITGA2, PTCH1, GLI2, GLI3	409	63	13528	4.2001	0.99755	0.122509	4.72102
GOTERM_BP_FAT	GO:0000122~negative regulation of transcription from RNA polymerase II promoter	18	3.42205	0.00294448	ATF7IP, SATB1, SLA2, ZHX2, PAX5, GLI2, PROX1, GFI1B, NCOA2, ATN1, BPTF, HIPK2, ZFPM2, HIVEP1, NR2F2, ZFHX3, KDM6B, NCOR2	409	266	13528	2.23821	0.998267	0.126519	4.98584
GOTERM_BP_FAT	GO:0030324~lung development	10	1.90114	0.00298678	CTTNBP2, EP300, EPAS1, GATA6, ZFPM2, HHIP, GLI2, PROX1, GLI3, NFIB	409	99	13528	3.34099	0.998418	0.125722	5.05574
GOTERM_BP_FAT	GO:0048858~cell projection morphogenesis	17	3.23194	0.00311732	DRD2, ONECUT2, MAP1B, NFASC, STXBP1, CELSR2, L1CAM, GLI2, SLITRK2, SEMA6A, IGF1R, ULK1, CNTN2, RELN, APBB2, CACNA1A, DSCAM	409	245	13528	2.29506	0.998807	0.128358	5.27111
GOTERM_BP_FAT	GO:0030323~respiratory tube development	10	1.90114	0.00365271	CTTNBP2, EP300, EPAS1, GATA6, ZFPM2, HHIP, GLI2, PROX1, GLI3, NFIB	409	102	13528	3.24272	0.999625	0.145974	6.14963
GOTERM_BP_FAT	GO:0016337~cell-cell adhesion	18	3.42205	0.00426828	PCDHB7, CLSTN2, PCDHB6, ASTN1, STXBP1, PCDHGC5, CELSR2, L1CAM, PTPRT, PCDH17, SOX9, PCDHGB5, PCDH19, CD84, JUP, NCAM1, FAT3, FAT4	409	276	13528	2.15712	0.999901	0.165419	7.15023
GOTERM_BP_FAT	GO:0032990~cell part morphogenesis	17	3.23194	0.00473283	DRD2, ONECUT2, MAP1B, NFASC, STXBP1, CELSR2, L1CAM, GLI2, SLITRK2, SEMA6A, IGF1R, ULK1, CNTN2, RELN, APBB2, CACNA1A, DSCAM	409	256	13528	2.19644	0.999964	0.17856	7.89869
GOTERM_BP_FAT	GO:0010605~negative regulation of macromolecule metabolic process	36	6.84411	0.00484668	PML, PAX5, ELK3, SOX9, GLI2, GLI3, TIMP1, TRIM66, GFI1B, EIF4EBP2, TNRC6C, ATN1, BHLHE40, TNRC6B, NR2F2, BAZ2A, ATF7IP, SATB1, ZCCHC11, SLA2, ZHX2, GRIN2A, BRCA2, PRKCG, PHF12, SPEN, PROX1, NCOA2, BPTF, HIPK2, ZFPM2, HIVEP1, ZFHX3, KDM6B, NCOR2, EIF2AK4	409	734	13528	1.62225	0.999972	0.179334	8.08125
GOTERM_BP_FAT	GO:0051926~negative regulation of calcium ion transport	4	0.760456	0.00489048	NOS1, GNAO1, PTGS2, DRD2	409	12	13528	11.0253	0.999974	0.177771	8.15139
GOTERM_BP_FAT	GO:0006366~transcription from RNA polymerase II promoter	16	3.04183	0.00491751	KLF5, SUPT3H, CCNK, EPAS1, PAX5, HCFC1, CREB5, NFIX, MED14, PPARGC1A, TCERG1, POU2F2, NCOA6, NFAT5, ZFHX3, NFATC1	409	234	13528	2.26159	0.999976	0.175717	8.19465
GOTERM_BP_FAT	GO:0048096~chromatin-mediated maintenance of transcription	3	0.570342	0.0052292	SMARCD1, ARID1A, ARID1B	409	4	13528	24.8068	0.999988	0.182785	8.69212
GOTERM_BP_FAT	GO:0060541~respiratory system development	10	1.90114	0.00533027	CTTNBP2, EP300, EPAS1, GATA6, ZFPM2, HHIP, GLI2, PROX1, GLI3, NFIB	409	108	13528	3.06257	0.99999	0.183031	8.85289
GOTERM_BP_FAT	GO:0035295~tube development	15	2.85171	0.00686377	SHROOM3, FLT1, EPAS1, GLI2, PROX1, GLI3, ZIC2, CTTNBP2, EP300, GATA6, SALL1, ZFPM2, PTCH1, HHIP, NFIB	409	220	13528	2.25517	1	0.225875	11.2596
GOTERM_BP_FAT	GO:0015674~di-, tri-valent inorganic cation transport	13	2.47148	0.00712805	ATP2B4, DRD2, CACNG7, RYR3, ATP2A1, CACNA1G, GRIN2A, CACNA1E, ITPR3, CACNA1C, CACNA1D, CACNA1A, NFATC1	409	176	13528	2.4431	1	0.230034	11.6683
GOTERM_BP_FAT	GO:0008542~visual learning	5	0.95057	0.00825743	DRD2, ATP1A3, GRIN2A, NLGN3, CACNA1C	409	27	13528	6.12515	1	0.257661	13.3949
GOTERM_BP_FAT	GO:0007442~hindgut morphogenesis	3	0.570342	0.00854181	GLI2, GLI3, TCF7L2	409	5	13528	19.8455	1	0.261549	13.8246
GOTERM_BP_FAT	GO:0051642~centrosome localization	3	0.570342	0.00854181	SEMA6A, PLXNA2, ASPM	409	5	13528	19.8455	1	0.261549	13.8246
GOTERM_BP_FAT	GO:0045333~cellular respiration	9	1.71103	0.00893156	ND1, ND4L, ND4, COX3, ND5, COX2, ND2, ND3, CYTB, ATP8, PPARGC1A, ATP6	409	97	13528	3.06889	1	0.268006	14.4103
GOTERM_BP_FAT	GO:0016568~chromatin modification	17	3.23194	0.00897186	SUPT3H, SETD1B, RCOR1, CREBBP, ARID1A, TRRAP, ARID1B, DOT1L, EP300, GFI1B, SAP130, BPTF, ATXN7, SMARCD1, BAZ2A, KDM6B, EP400	409	274	13528	2.05215	1	0.265395	14.4706
GOTERM_BP_FAT	GO:0007268~synaptic transmission	18	3.42205	0.00898029	GABRA2, NOS1, PCDHB6, DRD2, GRIN2A, GRIK5, BSN, NLGN3, STX1B, CTTNBP2, KCNQ5, SYN1, GRM7, SYN2, CACNA1E, CACNA1C, NOVA1, CACNA1A	409	298	13528	1.99787	1	0.262058	14.4832
GOTERM_BP_FAT	GO:0050808~synapse organization	7	1.3308	0.00995216	DNM3, DRD2, PCDHB6, MAP1B, NFASC, NLGN3, CACNA1A	409	61	13528	3.79558	1	0.28234	15.9262
GOTERM_BP_FAT	GO:0048514~blood vessel morphogenesis	14	2.6616	0.0116284	ZFP36L1, KLF5, BGN, FLT1, EPAS1, ZMIZ1, WASF2, PRRX1, ZFPM2, ELK3, MKL2, ADRA2B, NR2F2, PROX1	409	211	13528	2.1946	1	0.317564	18.3611
GOTERM_BP_FAT	GO:0044057~regulation of system process	18	3.42205	0.0125294	GNAO1, NOS1, FLT1, PTGS2, EPAS1, DRD2, MAP1B, GRIN2A, STXBP1, ITGA2, NLGN3, RASGRF1, CHRM2, ATP2A1, CACNA1G, BHLHE40, CACNA1C, CACNA1A	409	309	13528	1.92675	1	0.33351	19.6422
GOTERM_BP_FAT	GO:0007010~cytoskeleton organization	23	4.37262	0.0129485	FGD1, SHROOM3, SSH1, ACTA1, WASF1, WASF2, MAP1B, SSH2, BRCA2, MID1, PROX1, MARK4, ESPN, TACC2, CTTNBP2, SEMA6A, MAST1, ANK1, PAK2, XIRP2, WIPF1, ABL2, TMOD1	409	436	13528	1.74482	1	0.338486	20.2318
GOTERM_BP_FAT	GO:0007632~visual behavior	5	0.95057	0.0134724	DRD2, ATP1A3, GRIN2A, NLGN3, CACNA1C	409	31	13528	5.33481	1	0.345462	20.9629
GOTERM_BP_FAT	GO:0007409~axonogenesis	13	2.47148	0.0141881	SLITRK2, IGF1R, SEMA6A, ULK1, DRD2, MAP1B, STXBP1, NFASC, CNTN2, L1CAM, RELN, APBB2, GLI2	409	193	13528	2.2279	1	0.356043	21.9516
GOTERM_BP_FAT	GO:0030001~metal ion transport	24	4.56274	0.0142527	SLC9A8, KCNC3, SCN3B, ATP1B2, DRD2, CACNG7, GRIN2A, ATP1A3, ITPR3, KCNQ5, ATP2B4, KCNT2, SLC17A1, RYR3, ATP2A1, CACNA1G, KCNH7, KCNH8, CACNA1E, CACNA1C, CACNA1D, CACNA1A, SLC9A1, NFATC1	409	465	13528	1.70714	1	0.353327	22.0402
GOTERM_BP_FAT	GO:0016573~histone acetylation	6	1.14068	0.0143853	SUPT3H, EP300, SAP130, CREBBP, TRRAP, EP400	409	48	13528	4.13447	1	0.352014	22.2218
GOTERM_BP_FAT	GO:0048666~neuron development	19	3.61217	0.0144955	GNAO1, DRD2, ONECUT2, MAP1B, NFASC, STXBP1, CELSR2, L1CAM, GLI2, SLITRK2, SEMA6A, IGF1R, ULK1, RASGRF1, CNTN2, RELN, APBB2, CACNA1A, DSCAM	409	339	13528	1.85381	1	0.350301	22.3725
GOTERM_BP_FAT	GO:0007416~synaptogenesis	5	0.95057	0.0150393	DNM3, DRD2, PCDHB6, MAP1B, CACNA1A	409	32	13528	5.16809	1	0.35693	23.1122
GOTERM_BP_FAT	GO:0042593~glucose homeostasis	6	1.14068	0.015635	CACNA1E, PTCH1, FOXO3, CACNA1C, PPARGC1A, TCF7L2	409	49	13528	4.0501	1	0.364284	23.9147
GOTERM_BP_FAT	GO:0033500~carbohydrate homeostasis	6	1.14068	0.015635	CACNA1E, PTCH1, FOXO3, CACNA1C, PPARGC1A, TCF7L2	409	49	13528	4.0501	1	0.364284	23.9147
GOTERM_BP_FAT	GO:0048589~developmental growth	8	1.52091	0.0159427	PTGS2, ULK1, ZMIZ1, CHST11, BRCA2, FOXO3, GLI2, GLI3	409	87	13528	3.04145	1	0.366132	24.3262
GOTERM_BP_FAT	GO:0021915~neural tube development	7	1.3308	0.016474	SHROOM3, PTCH1, GLI2, PROX1, GLI3, TCF7L2, ZIC2	409	68	13528	3.40486	1	0.371937	25.0317
GOTERM_BP_FAT	GO:0001568~blood vessel development	15	2.85171	0.0165442	KLF5, FLT1, EPAS1, WASF2, PRRX1, ELK3, PROX1, TCF7L2, ZFP36L1, BGN, ZMIZ1, ZFPM2, ADRA2B, MKL2, NR2F2	409	245	13528	2.02505	1	0.369426	25.1245
GOTERM_BP_FAT	GO:0006812~cation transport	27	5.13308	0.0169006	SLC9A8, KCNC3, SLC22A13, ATP1B2, SCN3B, DRD2, KCNQ5, ATP2B4, ATP8, ATP6, NFATC1, CACNG7, ATP1A3, GRIN2A, ITPR3, COX3, KCNT2, UCP2, RYR3, SLC17A1, ATP2A1, CACNA1G, KCNH7, CACNA1E, KCNH8, CACNA1C, CACNA1D, CACNA1A, SLC9A1	409	553	13528	1.61491	1	0.371977	25.5936
GOTERM_BP_FAT	GO:0045815~positive regulation of gene expression, epigenetic	3	0.570342	0.0172333	SMARCD1, ARID1A, ARID1B	409	7	13528	14.1753	1	0.37405	26.0291
GOTERM_BP_FAT	GO:0034109~homotypic cell-cell adhesion	3	0.570342	0.0172333	NCAM1, STXBP1, L1CAM	409	7	13528	14.1753	1	0.37405	26.0291
GOTERM_BP_FAT	GO:0006936~muscle contraction	11	2.09125	0.0175891	GNAO1, ACTA1, MYBPC1, DRD2, RYR3, CACNA1G, DAG1, ADRA1A, ACTN2, CACNA1C, MYH8	409	153	13528	2.378	1	0.376458	26.4922
GOTERM_BP_FAT	GO:0001708~cell fate specification	6	1.14068	0.0183471	SALL1, TEAD4, SOX9, GLI2, FRS2, GLI3	409	51	13528	3.89127	1	0.385455	27.4697
GOTERM_BP_FAT	GO:0007611~learning or memory	9	1.71103	0.0190339	PTGS2, DRD2, RASGRF1, GRM7, ATP1A3, GRIN2A, PRKCG, NLGN3, CACNA1C	409	111	13528	2.68182	1	0.392977	28.3449
GOTERM_BP_FAT	GO:0030036~actin cytoskeleton organization	14	2.6616	0.0195125	FGD1, SHROOM3, SSH1, ACTA1, WASF1, WASF2, SSH2, PROX1, ESPN, PAK2, XIRP2, WIPF1, ABL2, TMOD1	409	226	13528	2.04894	1	0.396959	28.9488
GOTERM_BP_FAT	GO:0006473~protein amino acid acetylation	6	1.14068	0.0198124	SUPT3H, EP300, SAP130, CREBBP, TRRAP, EP400	409	52	13528	3.81644	1	0.398049	29.3247
GOTERM_BP_FAT	GO:0001944~vasculature development	15	2.85171	0.0199971	KLF5, FLT1, EPAS1, WASF2, PRRX1, ELK3, PROX1, TCF7L2, ZFP36L1, BGN, ZMIZ1, ZFPM2, ADRA2B, MKL2, NR2F2	409	251	13528	1.97664	1	0.39734	29.5554
GOTERM_BP_FAT	GO:0006937~regulation of muscle contraction	7	1.3308	0.0212904	FLT1, NOS1, PTGS2, CHRM2, ATP2A1, CACNA1G, ITGA2	409	72	13528	3.2157	1	0.413338	31.1505
GOTERM_BP_FAT	GO:0007015~actin filament organization	7	1.3308	0.0212904	PAK2, ACTA1, WASF1, WIPF1, PROX1, ABL2, ESPN	409	72	13528	3.2157	1	0.413338	31.1505
GOTERM_BP_FAT	GO:0001889~liver development	6	1.14068	0.0213523	EP300, GATA6, ONECUT2, ITGA2, MKL2, PROX1	409	53	13528	3.74443	1	0.410686	31.226
GOTERM_BP_FAT	GO:0022900~electron transport chain	9	1.71103	0.0219695	ND1, ND4L, ND4, COX3, ND5, COX2, ND2, ND3, CYTB, ATP8, PPARGC1A, ATP6	409	114	13528	2.61125	1	0.416165	31.9744
GOTERM_BP_FAT	GO:0045165~cell fate commitment	10	1.90114	0.0249286	SALL1, TEAD4, ONECUT2, SOX9, GLI2, NR2F2, PROX1, FRS2, GLI3, TCF7L2	409	139	13528	2.37955	1	0.453788	35.4572
GOTERM_BP_FAT	GO:0007628~adult walking behavior	4	0.760456	0.0274068	DRD2, HIPK2, CACNA1C, CACNA1A	409	22	13528	6.01378	1	0.482318	38.2439
GOTERM_BP_FAT	GO:0006119~oxidative phosphorylation	8	1.52091	0.0285888	ND1, ND4L, ND4, COX3, ND5, COX2, ND2, ND3, CYTB, ATP8, ATP6	409	98	13528	2.70006	1	0.49325	39.5329
GOTERM_BP_FAT	GO:0007613~memory	5	0.95057	0.0292031	PTGS2, RASGRF1, GRM7, ATP1A3, GRIN2A	409	39	13528	4.24049	1	0.496963	40.1926
GOTERM_BP_FAT	GO:0021510~spinal cord development	5	0.95057	0.0292031	RELN, GLI2, PROX1, GLI3, CACNA1A	409	39	13528	4.24049	1	0.496963	40.1926
GOTERM_BP_FAT	GO:0007507~heart development	13	2.47148	0.0295857	EP300, GATA6, ZMIZ1, NCOA6, TEAD1, ZFPM2, PTCH1, MKL2, SOX9, GLI2, PROX1, GLI3, NFATC1	409	215	13528	1.99993	1	0.497833	40.6001
GOTERM_BP_FAT	GO:0051101~regulation of DNA binding	9	1.71103	0.0300346	EP300, STK36, HIPK2, ITGA2, ZNF462, BRD4, NR2F2, PROX1, TRIB1	409	121	13528	2.46018	1	0.499463	41.0748
GOTERM_BP_FAT	GO:0030518~steroid hormone receptor signaling pathway	6	1.14068	0.0302127	NCOA2, NCOA6, PIAS2, ARID1A, MED14, PPARGC1A	409	58	13528	3.42163	1	0.497916	41.2622
GOTERM_BP_FAT	GO:0042493~response to drug	13	2.47148	0.030591	CTTNBP2, GNAO1, EP300, PTGS2, DRD2, PDE4A, MAP1B, ATP1A3, GRIN2A, ITGA2, PTCH1, PARP4, SLC9A1	409	216	13528	1.99067	1	0.498704	41.6584
GOTERM_BP_FAT	GO:0006928~cell motion	23	4.37262	0.0306052	CER1, FLT1, PTGS2, PLXNA2, DRD2, PODXL, WASF1, WASF2, ASTN1, ITGA11, NFASC, ITGA2, L1CAM, DNAH2, GLI2, CTTNBP2, SEMA6A, ULK1, CNTN2, RELN, NR2F2, APBB2, FN1	409	475	13528	1.60156	1	0.495321	41.6732
GOTERM_BP_FAT	GO:0043271~negative regulation of ion transport	4	0.760456	0.0308308	NOS1, GNAO1, PTGS2, DRD2	409	23	13528	5.75231	1	0.494392	41.9081
GOTERM_BP_FAT	GO:0030029~actin filament-based process	14	2.6616	0.0309034	FGD1, SHROOM3, SSH1, ACTA1, WASF1, WASF2, SSH2, PROX1, ESPN, PAK2, XIRP2, WIPF1, ABL2, TMOD1	409	241	13528	1.92142	1	0.491754	41.9836
GOTERM_BP_FAT	GO:0003012~muscle system process	11	2.09125	0.0311411	GNAO1, ACTA1, MYBPC1, DRD2, RYR3, CACNA1G, DAG1, ADRA1A, ACTN2, CACNA1C, MYH8	409	168	13528	2.16568	1	0.491009	42.2299
GOTERM_BP_FAT	GO:0006351~transcription, DNA-dependent	16	3.04183	0.0312868	KLF5, SUPT3H, CCNK, EPAS1, PAX5, HCFC1, CREB5, NFIX, MED14, PPARGC1A, TCERG1, POU2F2, NCOA6, NFAT5, ZFHX3, NFATC1	409	292	13528	1.81237	1	0.489255	42.3804
GOTERM_BP_FAT	GO:0016570~histone modification	9	1.71103	0.031333	SUPT3H, EP300, SAP130, ATXN7, CREBBP, TRRAP, BAZ2A, KDM6B, EP400	409	122	13528	2.44002	1	0.486424	42.428
GOTERM_BP_FAT	GO:0007243~protein kinase cascade	19	3.61217	0.0314016	TLR10, FLT1, DRD2, MADD, PFKFB1, WNK1, WNK2, TRIB1, IGF1R, MAST1, STAT4, MAP3K4, PRLR, GAB1, SPRED2, ADRA1A, ADRA2B, FRS2, SLC9A1	409	370	13528	1.69849	1	0.483882	42.4987
GOTERM_BP_FAT	GO:0007389~pattern specification process	15	2.85171	0.0316566	CER1, SHROOM3, FLT1, CELSR2, MID1, GLI2, GLI3, EP300, SFRP2, HIPK2, PTCH1, RELN, HHIP, NR2F2, FRS2	409	267	13528	1.85819	1	0.483421	42.7607
GOTERM_BP_FAT	GO:0002009~morphogenesis of an epithelium	8	1.52091	0.03296	FRAS1, SHROOM3, DAG1, PTCH1, GLI2, PROX1, GLI3, ZIC2	409	101	13528	2.61986	1	0.494239	44.0823
GOTERM_BP_FAT	GO:0021700~developmental maturation	8	1.52091	0.03296	PTGS2, EPAS1, MAP1B, STXBP1, BRCA2, FOXO3, CACNA1A, TIMP1	409	101	13528	2.61986	1	0.494239	44.0823
GOTERM_BP_FAT	GO:0051969~regulation of transmission of nerve impulse	10	1.90114	0.0340534	PTGS2, DRD2, RASGRF1, MAP1B, STXBP1, GRIN2A, ITGA2, NLGN3, BHLHE40, CACNA1A	409	147	13528	2.25005	1	0.502477	45.1688
GOTERM_BP_FAT	GO:0043543~protein amino acid acylation	6	1.14068	0.034317	SUPT3H, EP300, SAP130, CREBBP, TRRAP, EP400	409	60	13528	3.30758	1	0.501972	45.4278
GOTERM_BP_FAT	GO:0030902~hindbrain development	6	1.14068	0.034317	NCOA2, ULK1, PLXNA2, GLI2, CACNA1A, NFIB	409	60	13528	3.30758	1	0.501972	45.4278
GOTERM_BP_FAT	GO:0007612~learning	6	1.14068	0.034317	DRD2, GRM7, ATP1A3, GRIN2A, NLGN3, CACNA1C	409	60	13528	3.30758	1	0.501972	45.4278
GOTERM_BP_FAT	GO:0032774~RNA biosynthetic process	16	3.04183	0.0346435	KLF5, SUPT3H, CCNK, EPAS1, PAX5, HCFC1, CREB5, NFIX, MED14, PPARGC1A, TCERG1, POU2F2, NCOA6, NFAT5, ZFHX3, NFATC1	409	296	13528	1.78788	1	0.502119	45.7469
GOTERM_BP_FAT	GO:0007439~ectodermal gut development	3	0.570342	0.0347878	GLI2, GLI3, TCF7L2	409	10	13528	9.92274	1	0.500418	45.8875
GOTERM_BP_FAT	GO:0048567~ectodermal gut morphogenesis	3	0.570342	0.0347878	GLI2, GLI3, TCF7L2	409	10	13528	9.92274	1	0.500418	45.8875
GOTERM_BP_FAT	GO:0019226~transmission of nerve impulse	18	3.42205	0.0359113	GABRA2, NOS1, PCDHB6, DRD2, GRIN2A, GRIK5, BSN, NLGN3, STX1B, CTTNBP2, KCNQ5, SYN1, GRM7, SYN2, CACNA1E, CACNA1C, NOVA1, CACNA1A	409	350	13528	1.70104	1	0.50853	46.9696
GOTERM_BP_FAT	GO:0003002~regionalization	12	2.28137	0.0362449	CER1, EP300, SFRP2, HIPK2, RELN, CELSR2, PTCH1, HHIP, GLI2, NR2F2, FRS2, GLI3	409	197	13528	2.01477	1	0.508686	47.2869
GOTERM_BP_FAT	GO:0016569~covalent chromatin modification	9	1.71103	0.03691	SUPT3H, EP300, SAP130, ATXN7, CREBBP, TRRAP, BAZ2A, KDM6B, EP400	409	126	13528	2.36256	1	0.512056	47.9142
GOTERM_BP_FAT	GO:0006120~mitochondrial electron transport, NADH to ubiquinone	5	0.95057	0.0370627	ND1, ND4L, ND4, ND5, ND2, ND3	409	42	13528	3.93759	1	0.510446	48.0573
GOTERM_BP_FAT	GO:0010648~negative regulation of cell communication	14	2.6616	0.0374712	CER1, RGS7BP, PTGS2, DRD2, SLA2, ONECUT2, STXBP1, TRIB1, PEG10, CBLB, ATXN7, HIPK2, CHST11, HHIP	409	248	13528	1.86718	1	0.511299	48.4382
GOTERM_BP_FAT	GO:0007169~transmembrane receptor protein tyrosine kinase signaling pathway	13	2.47148	0.0387533	NTRK3, IGF1R, FLT1, EIF4EBP2, PRLR, PTPRG, CBL, GAB1, PTPRT, ALK, FRS2, CACNA1A, LCP2	409	224	13528	1.91958	1	0.520305	49.6165
GOTERM_BP_FAT	GO:0016477~cell migration	15	2.85171	0.0399943	CER1, CTTNBP2, FLT1, ULK1, DRD2, PLXNA2, PODXL, WASF2, ASTN1, ITGA11, CNTN2, RELN, APBB2, NR2F2, FN1	409	276	13528	1.7976	1	0.528639	50.7328
GOTERM_BP_FAT	GO:0001701~in utero embryonic development	11	2.09125	0.0407966	DAB2, SYVN1, EPAS1, GATA6, ZMIZ1, TEAD4, NCOA6, BRCA2, ZFPM2, MKL2, GLI3	409	176	13528	2.06724	1	0.532817	51.4421
GOTERM_BP_FAT	GO:0030900~forebrain development	10	1.90114	0.0408018	GNAO1, DRD2, RELN, GLI2, NR2F2, FRS2, GLI3, ASPM, NFIB, TACC2	409	152	13528	2.17604	1	0.529866	51.4467
GOTERM_BP_FAT	GO:0030238~male sex determination	3	0.570342	0.0416849	IGF1R, SF1, SOX9	409	11	13528	9.02067	1	0.534664	52.2162
GOTERM_BP_FAT	GO:0048813~dendrite morphogenesis	3	0.570342	0.0416849	CELSR2, CACNA1A, DSCAM	409	11	13528	9.02067	1	0.534664	52.2162
GOTERM_BP_FAT	GO:0031644~regulation of neurological system process	10	1.90114	0.0422526	PTGS2, DRD2, RASGRF1, MAP1B, STXBP1, GRIN2A, ITGA2, NLGN3, BHLHE40, CACNA1A	409	153	13528	2.16182	1	0.536631	52.7048
GOTERM_BP_FAT	GO:0030182~neuron differentiation	21	3.9924	0.0434158	GNAO1, DRD2, MAP1B, ONECUT2, NFASC, STXBP1, CELSR2, L1CAM, GLI2, GLI3, SLITRK2, NTRK3, SEMA6A, IGF1R, ULK1, RASGRF1, CNTN2, RELN, APBB2, CACNA1A, DSCAM	409	438	13528	1.58583	1	0.543608	53.6912
GOTERM_BP_FAT	GO:0048167~regulation of synaptic plasticity	6	1.14068	0.0435187	PTGS2, DRD2, RASGRF1, MAP1B, GRIN2A, BHLHE40	409	64	13528	3.10086	1	0.541553	53.7775
GOTERM_BP_FAT	GO:0016311~dephosphorylation	10	1.90114	0.0437378	PTPRD, MTMR1, SSH1, PTPRG, SYNJ1, SSH2, PTPN14, PTPRT, PTPRN, PTPN12	409	154	13528	2.14778	1	0.540495	53.9608
GOTERM_BP_FAT	GO:0048870~cell motility	16	3.04183	0.0451924	CER1, FLT1, DRD2, PLXNA2, PODXL, WASF2, ASTN1, ITGA11, DNAH2, CTTNBP2, ULK1, CNTN2, RELN, NR2F2, APBB2, FN1	409	307	13528	1.72382	1	0.54961	55.1604
GOTERM_BP_FAT	GO:0051674~localization of cell	16	3.04183	0.0451924	CER1, FLT1, DRD2, PLXNA2, PODXL, WASF2, ASTN1, ITGA11, DNAH2, CTTNBP2, ULK1, CNTN2, RELN, NR2F2, APBB2, FN1	409	307	13528	1.72382	1	0.54961	55.1604
GOTERM_BP_FAT	GO:0060284~regulation of cell development	12	2.28137	0.0460615	NTRK3, ATN1, ULK1, DRD2, MAP1B, MBNL3, GLI2, TIMP2, PROX1, ZFHX3, ASPM, CACNA1A	409	205	13528	1.93614	1	0.553758	55.8631
GOTERM_BP_FAT	GO:0032350~regulation of hormone metabolic process	3	0.570342	0.0490438	TRERF1, TCF7L2, CACNA1A	409	12	13528	8.26895	1	0.574162	58.1961
GOTERM_BP_FAT	GO:0021511~spinal cord patterning	3	0.570342	0.0490438	RELN, GLI2, GLI3	409	12	13528	8.26895	1	0.574162	58.1961
GOTERM_BP_FAT	GO:0048660~regulation of smooth muscle cell proliferation	5	0.95057	0.049255	FLT1, PTGS2, SF1, ITGA2, TRIB1	409	46	13528	3.5952	1	0.572913	58.3568
GOTERM_BP_FAT	GO:0001816~cytokine production	5	0.95057	0.049255	REL, NFAT5, NFATC2, CD226, LCP2	409	46	13528	3.5952	1	0.572913	58.3568
GOTERM_BP_FAT	GO:0040007~growth	11	2.09125	0.0507813	PTGS2, ACTA1, ULK1, ZMIZ1, CHST11, BRCA2, FOXO3, GLI2, GLI3, CACNA1A, SLC9A1	409	183	13528	1.98816	1	0.581477	59.5012
GOTERM_BP_FAT	GO:0048732~gland development	9	1.71103	0.0518028	IGF1R, CTTNBP2, PRLR, DRD2, BRCA2, ITGA2, PTCH1, GLI2, GLI3	409	135	13528	2.20505	1	0.586121	60.2506
GOTERM_BP_FAT	GO:0050804~regulation of synaptic transmission	9	1.71103	0.0536652	PTGS2, DRD2, RASGRF1, MAP1B, STXBP1, GRIN2A, NLGN3, BHLHE40, CACNA1A	409	136	13528	2.18884	1	0.596591	61.5831
GOTERM_BP_FAT	GO:0007167~enzyme linked receptor protein signaling pathway	17	3.23194	0.0544421	CER1, PTPRD, FLT1, PTPRG, CBL, PML, PTPRT, ALK, NTRK3, IGF1R, EIF4EBP2, PRLR, HIPK2, GAB1, FRS2, CACNA1A, LCP2	409	342	13528	1.64412	1	0.59922	62.1265
GOTERM_BP_FAT	GO:0030155~regulation of cell adhesion	9	1.71103	0.05557	CD47, LAMA3, PRLR, PODXL, ONECUT2, ITGA2, CDK6, L1CAM, CELSR2	409	137	13528	2.17286	1	0.604188	62.9024
GOTERM_BP_FAT	GO:0031056~regulation of histone modification	3	0.570342	0.0568305	PML, PAX5, PPARGC1A	409	13	13528	7.63288	1	0.609914	63.7519
GOTERM_BP_FAT	GO:0016578~histone deubiquitination	3	0.570342	0.0568305	SUPT3H, ATXN7, TRRAP	409	13	13528	7.63288	1	0.609914	63.7519
GOTERM_BP_FAT	GO:0021522~spinal cord motor neuron differentiation	3	0.570342	0.0568305	GLI2, GLI3, CACNA1A	409	13	13528	7.63288	1	0.609914	63.7519
GOTERM_BP_FAT	GO:0009416~response to light stimulus	9	1.71103	0.0575173	DRD2, RRH, PML, ATP1A3, GRIN2A, BRCA2, RCVRN, NLGN3, CACNA1C	409	138	13528	2.15712	1	0.611728	64.207
GOTERM_BP_FAT	GO:0021775~smoothened signaling pathway involved in ventral spinal cord interneuron specification	2	0.380228	0.0594119	GLI2, GLI3	409	2	13528	33.0758	1	0.621293	65.4346
GOTERM_BP_FAT	GO:0021776~smoothened signaling pathway involved in spinal cord motor neuron cell fate specification	2	0.380228	0.0594119	GLI2, GLI3	409	2	13528	33.0758	1	0.621293	65.4346
GOTERM_BP_FAT	GO:0046619~optic placode formation involved in camera-type eye	2	0.380228	0.0594119	PROX1, FRS2	409	2	13528	33.0758	1	0.621293	65.4346
GOTERM_BP_FAT	GO:0031915~positive regulation of synaptic plasticity	2	0.380228	0.0594119	PTGS2, MAP1B	409	2	13528	33.0758	1	0.621293	65.4346
GOTERM_BP_FAT	GO:0001743~optic placode formation	2	0.380228	0.0594119	PROX1, FRS2	409	2	13528	33.0758	1	0.621293	65.4346
GOTERM_BP_FAT	GO:0006811~ion transport	32	6.08365	0.0598011	SLC9A8, KCNC3, SLC22A13, ATP1B2, SCN3B, DRD2, GRIK5, CTTNBP2, KCNQ5, ATP2B4, ATP8, ATP6, NFATC1, GABRA2, CACNG7, WNK1, ATP1A3, GRIN2A, ITPR3, COX3, KCNT2, UCP2, SLC17A1, RYR3, ATP2A1, CACNA1G, KCNH7, CACNA1E, KCNH8, CLCN6, CACNA1C, CACNA1D, CACNA1A, SLC9A1	409	768	13528	1.37816	1	0.621076	65.6819
GOTERM_BP_FAT	GO:0021549~cerebellum development	4	0.760456	0.0606386	NCOA2, ULK1, GLI2, CACNA1A	409	30	13528	4.41011	1	0.623677	66.2082
GOTERM_BP_FAT	GO:0051276~chromosome organization	22	4.18251	0.0622821	SUPT3H, SATB1, SETD1B, RCOR1, CREBBP, BRCA2, ARID1A, ARID1B, TRRAP, DCLRE1C, DOT1L, EP300, NIPBL, GFI1B, BPTF, SAP130, ATXN7, SMARCD1, STAG3, BAZ2A, KDM6B, EP400	409	485	13528	1.50035	1	0.631177	67.2191
GOTERM_BP_FAT	GO:0045596~negative regulation of cell differentiation	12	2.28137	0.0623128	ZCCHC11, ULK1, CREBBP, CDK6, MBNL3, SOX9, GLI2, RUNX1, ZFHX3, GLI3, TCF7L2, ASPM	409	216	13528	1.83754	1	0.628728	67.2377
GOTERM_BP_FAT	GO:0070482~response to oxygen levels	9	1.71103	0.0636167	FLT1, NOS1, EP300, COX3, EPAS1, CREBBP, PML, ITGA2, PDLIM1, ATP8, ATP6	409	141	13528	2.11122	1	0.633981	68.019
GOTERM_BP_FAT	GO:0007267~cell-cell signaling	26	4.94297	0.063904	DRD2, GRIK5, GLI2, CTTNBP2, KCNQ5, SYN1, SYN2, ZYX, ADRA2B, FRS2, NOVA1, GABRA2, NOS1, PCDHB6, DLGAP4, GRIN2A, BSN, NLGN3, STX1B, GRM7, SALL1, ADRA1A, CACNA1E, STC1, CACNA1C, CACNA1A	409	600	13528	1.43328	1	0.633094	68.1887
GOTERM_BP_FAT	GO:0009719~response to endogenous stimulus	19	3.61217	0.0645584	ALPL, GNAO1, ACTA1, PTGS2, DRD2, PFKFB1, MAP1B, GRIN2A, BRCA2, ITGA2, PTPRN, CTTNBP2, IGF1R, EP300, EIF4EBP2, NCOA6, GAB1, PTCH1, ABCC5	409	405	13528	1.5517	1	0.634388	68.5722
GOTERM_BP_FAT	GO:0048844~artery morphogenesis	3	0.570342	0.0650127	ZMIZ1, PRRX1, PROX1	409	14	13528	7.08767	1	0.634492	68.8359
GOTERM_BP_FAT	GO:0048488~synaptic vesicle endocytosis	3	0.570342	0.0650127	SYNJ1, STXBP1, DENND1A	409	14	13528	7.08767	1	0.634492	68.8359
GOTERM_BP_FAT	GO:0032330~regulation of chondrocyte differentiation	3	0.570342	0.0650127	SOX9, GLI2, GLI3	409	14	13528	7.08767	1	0.634492	68.8359
GOTERM_BP_FAT	GO:0006325~chromatin organization	18	3.42205	0.0653336	SUPT3H, SATB1, SETD1B, RCOR1, CREBBP, ARID1A, TRRAP, ARID1B, DOT1L, EP300, GFI1B, BPTF, SAP130, ATXN7, SMARCD1, BAZ2A, KDM6B, EP400	409	378	13528	1.57504	1	0.63382	69.0209
GOTERM_BP_FAT	GO:0009991~response to extracellular stimulus	12	2.28137	0.0687848	ALPL, PTGS2, ACTA1, SFRP2, PFKFB1, MAP1B, BRCA2, ITGA2, STC1, PTCH1, PPARGC1A, EIF2AK4	409	220	13528	1.80413	1	0.650893	70.9461
GOTERM_BP_FAT	GO:0015980~energy derivation by oxidation of organic compounds	9	1.71103	0.0701046	ND1, ND4L, ND4, COX3, ND5, COX2, ND2, ND3, CYTB, ATP8, PPARGC1A, ATP6	409	144	13528	2.06724	1	0.655624	71.6521
GOTERM_BP_FAT	GO:0009968~negative regulation of signal transduction	12	2.28137	0.0708124	CER1, PEG10, CBLB, RGS7BP, DRD2, ATXN7, SLA2, HIPK2, CHST11, ONECUT2, HHIP, TRIB1	409	221	13528	1.79597	1	0.65696	72.0239
GOTERM_BP_FAT	GO:0021517~ventral spinal cord development	3	0.570342	0.0735596	GLI2, GLI3, CACNA1A	409	15	13528	6.61516	1	0.668979	73.4244
GOTERM_BP_FAT	GO:0042771~DNA damage response, signal transduction by p53 class mediator resulting in induction of apoptosis	3	0.570342	0.0735596	HIPK2, PML, BRCA2	409	15	13528	6.61516	1	0.668979	73.4244
GOTERM_BP_FAT	GO:0006939~smooth muscle contraction	4	0.760456	0.0763536	DRD2, CACNA1G, ADRA1A, CACNA1C	409	33	13528	4.00919	1	0.680697	74.7807
GOTERM_BP_FAT	GO:0007569~cell aging	4	0.760456	0.0763536	ZMIZ1, PML, BRCA2, PRELP	409	33	13528	4.00919	1	0.680697	74.7807
GOTERM_BP_FAT	GO:0048568~embryonic organ development	10	1.90114	0.076594	EPAS1, CHST11, PRRX1, ZFPM2, MKL2, GLI2, PROX1, FRS2, GLI3, TCF7L2	409	172	13528	1.92301	1	0.679467	74.8943
GOTERM_BP_FAT	GO:0008344~adult locomotory behavior	5	0.95057	0.0794287	DRD2, HIPK2, ATP1A3, CACNA1C, CACNA1A	409	54	13528	3.06257	1	0.69084	76.198
GOTERM_BP_FAT	GO:0060429~epithelium development	12	2.28137	0.0819083	FRAS1, LAMA3, SHROOM3, GATA6, ONECUT2, DAG1, PTCH1, GLI2, NR2F2, PROX1, GLI3, ZIC2	409	227	13528	1.7485	1	0.700077	77.2858
GOTERM_BP_FAT	GO:0021696~cerebellar cortex morphogenesis	3	0.570342	0.0824419	ULK1, GLI2, CACNA1A	409	16	13528	6.20171	1	0.700173	77.5137
GOTERM_BP_FAT	GO:0048639~positive regulation of developmental growth	3	0.570342	0.0824419	NTRK3, MAP1B, PROX1	409	16	13528	6.20171	1	0.700173	77.5137
GOTERM_BP_FAT	GO:0007405~neuroblast proliferation	3	0.570342	0.0824419	HHIP, FRS2, ASPM	409	16	13528	6.20171	1	0.700173	77.5137
GOTERM_BP_FAT	GO:0030035~microspike assembly	3	0.570342	0.0824419	DNM3, FGD1, ACTN2	409	16	13528	6.20171	1	0.700173	77.5137
GOTERM_BP_FAT	GO:0007090~regulation of S phase of mitotic cell cycle	3	0.570342	0.0824419	BRCA2, APBB2, PROX1	409	16	13528	6.20171	1	0.700173	77.5137
GOTERM_BP_FAT	GO:0040029~regulation of gene expression, epigenetic	6	1.14068	0.0827388	ATF7IP, ZCCHC11, SMARCD1, ARID1A, ARID1B, BAZ2A	409	77	13528	2.57733	1	0.699191	77.6396
GOTERM_BP_FAT	GO:0008016~regulation of heart contraction	6	1.14068	0.0827388	NOS1, GNAO1, EPAS1, CHRM2, DRD2, CACNA1G	409	77	13528	2.57733	1	0.699191	77.6396
GOTERM_BP_FAT	GO:0016358~dendrite development	4	0.760456	0.0877212	MAP1B, CELSR2, CACNA1A, DSCAM	409	35	13528	3.78009	1	0.718847	79.6552
GOTERM_BP_FAT	GO:0022037~metencephalon development	4	0.760456	0.0877212	NCOA2, ULK1, GLI2, CACNA1A	409	35	13528	3.78009	1	0.718847	79.6552
GOTERM_BP_FAT	GO:0018076~N-terminal peptidyl-lysine acetylation	2	0.380228	0.0877839	EP300, CREBBP	409	3	13528	22.0505	1	0.716833	79.6794
GOTERM_BP_FAT	GO:0070365~hepatocyte differentiation	2	0.380228	0.0877839	ITGA2, PROX1	409	3	13528	22.0505	1	0.716833	79.6794
GOTERM_BP_FAT	GO:0051657~maintenance of organelle location	2	0.380228	0.0877839	ATP2A1, ASPM	409	3	13528	22.0505	1	0.716833	79.6794
GOTERM_BP_FAT	GO:0021910~smoothened signaling pathway involved in ventral spinal cord patterning	2	0.380228	0.0877839	GLI2, GLI3	409	3	13528	22.0505	1	0.716833	79.6794
GOTERM_BP_FAT	GO:0018394~peptidyl-lysine acetylation	2	0.380228	0.0877839	EP300, CREBBP	409	3	13528	22.0505	1	0.716833	79.6794
GOTERM_BP_FAT	GO:0006338~chromatin remodeling	5	0.95057	0.0881312	BPTF, SMARCD1, ARID1A, ARID1B, BAZ2A	409	56	13528	2.9532	1	0.716042	79.8132
GOTERM_BP_FAT	GO:0009628~response to abiotic stimulus	17	3.23194	0.0899503	NOS1, ACTA1, DRD2, RRH, MAP1B, GRIN2A, ATP1A3, PML, ITGA2, BRCA2, RCVRN, NLGN3, DCLRE1C, HSPB6, PTCH1, CACNA1C, SLC9A1	409	368	13528	1.52796	1	0.721431	80.5004
GOTERM_BP_FAT	GO:0048547~gut morphogenesis	3	0.570342	0.0916316	GLI2, GLI3, TCF7L2	409	17	13528	5.8369	1	0.726107	81.1158
GOTERM_BP_FAT	GO:0042177~negative regulation of protein catabolic process	3	0.570342	0.0916316	GRIN2A, PRKCG, TIMP1	409	17	13528	5.8369	1	0.726107	81.1158
GOTERM_BP_FAT	GO:0030512~negative regulation of transforming growth factor beta receptor signaling pathway	3	0.570342	0.0916316	PEG10, CHST11, ONECUT2	409	17	13528	5.8369	1	0.726107	81.1158
GOTERM_BP_FAT	GO:0008589~regulation of smoothened signaling pathway	3	0.570342	0.0916316	PRRX1, PTCH1, HHIP	409	17	13528	5.8369	1	0.726107	81.1158
GOTERM_BP_FAT	GO:0051098~regulation of binding	9	1.71103	0.091913	EP300, STK36, HIPK2, ITGA2, ZNF462, BRD4, NR2F2, PROX1, TRIB1	409	153	13528	1.94563	1	0.725039	81.2171
GOTERM_BP_FAT	GO:0030521~androgen receptor signaling pathway	4	0.760456	0.0936567	PIAS2, ARID1A, MED14, PPARGC1A	409	36	13528	3.67509	1	0.729838	81.8329
GOTERM_BP_FAT	GO:0048168~regulation of neuronal synaptic plasticity	4	0.760456	0.0936567	DRD2, RASGRF1, GRIN2A, BHLHE40	409	36	13528	3.67509	1	0.729838	81.8329
GOTERM_BP_FAT	GO:0008361~regulation of cell size	11	2.09125	0.0936894	NTRK3, DAB2, EP300, ACTA1, ULK1, MAP1B, PML, APBB2, CACNA1A, SLC9A1, SERTAD2	409	206	13528	1.76618	1	0.72779	81.8442
